# Supplementary material
Source: publisher figshare collection journal article supplement (https://future-science-group.figshare.com/articles/dataset/_/21939662)
Supplement: Supplementary file 1 [file 1]

## Sheet: Supplementary Table 6
Supplementary Table 6 All results of GSVA
Label		Median GSVA score			Statistical significance		Presentation
Cohort	NAME	PSMB8 HypoMet-HighExp	PSMB8 HyperMet-LowExp	Differences	p value	FDR	234 pathways showed in heatmap
TCGA	GOBP_MITOCHONDRIAL_GENOME_MAINTENANCE	-0.0341946	-0.0687215	0.0345269	0.953789	0.964431	0
TCGA	GOBP_SINGLE_STRAND_BREAK_REPAIR	-0.00213204	-0.0397608	0.0376288	0.225091	0.299276	0
TCGA	GOBP_REGULATION_OF_DNA_RECOMBINATION	0.0614072	-0.0899508	0.151358	9.47617e-09	6.54307e-08	0
TCGA	GOBP_RIBOSOMAL_LARGE_SUBUNIT_ASSEMBLY	-0.0242987	-0.0525387	0.0282401	0.697717	0.758226	0
TCGA	GOBP_RIBOSOMAL_SMALL_SUBUNIT_ASSEMBLY	-0.0555147	-0.0776885	0.0221738	0.149565	0.211551	0
TCGA	GOBP_ACIDIC_AMINO_ACID_TRANSPORT	-0.0245494	0.0379613	-0.0625107	0.00169343	0.00408079	1
TCGA	GOBP_TRANSITION_METAL_ION_TRANSPORT	0.005904	0.01042	-0.00451603	0.745765	0.798641	0
TCGA	GOBP_UREA_CYCLE	-0.0521223	0.03677	-0.0888923	0.00789412	0.0160894	0
TCGA	GOBP_MITOTIC_SISTER_CHROMATID_SEGREGATION	0.0987686	-0.13839	0.237158	0.000478059	0.00132867	0
TCGA	GOBP_CELL_CYCLE_CHECKPOINT	0.0450876	-0.0705756	0.115663	0.0034685	0.00773062	0
TCGA	GOBP_DNA_REPLICATION_CHECKPOINT	0.164929	-0.148985	0.313914	0.000153771	0.00048592	0
TCGA	GOBP_REGULATION_OF_TRANSCRIPTION_INVOLVED_IN_G1_S_TRANSITION_OF_MITOTIC_CELL_CYCLE	0.164145	-0.111919	0.276064	4.20095e-08	2.61272e-07	0
TCGA	GOBP_ACTIVATED_T_CELL_PROLIFERATION	0.2438	-0.10192	0.34572	6.26891e-21	2.60777e-19	1
TCGA	GOBP_ALPHA_AMINO_ACID_BIOSYNTHETIC_PROCESS	-0.0810159	-0.00279075	-0.0782251	0.00218657	0.00514457	1
TCGA	GOBP_SULFUR_AMINO_ACID_CATABOLIC_PROCESS	-0.052729	-0.00179469	-0.0509343	0.0219825	0.0397297	0
TCGA	GOBP_ESTABLISHMENT_OF_MITOTIC_SPINDLE_ORIENTATION	-0.0690386	-0.020449	-0.0485897	0.0428315	0.0715032	0
TCGA	GOBP_RRNA_MODIFICATION	-0.0626389	-0.0367051	-0.0259338	0.94235	0.956676	0
TCGA	GOBP_RDNA_HETEROCHROMATIN_ASSEMBLY	-0.0849694	-0.0236001	-0.0613693	0.183216	0.251168	0
TCGA	GOBP_NUCLEAR_TRANSCRIBED_MRNA_CATABOLIC_PROCESS_NONSENSE_MEDIATED_DECAY	-0.102616	-0.00946497	-0.0931506	0.953026	0.963852	0
TCGA	GOBP_ACTIVATION_OF_MAPKKK_ACTIVITY	-0.00966216	-0.0175514	0.00788927	0.793345	0.838099	0
TCGA	GOBP_ACTIVATION_OF_MAPKK_ACTIVITY	-0.0125472	-0.0031354	-0.00941184	0.370222	0.454603	0
TCGA	GOBP_ACTIVATION_OF_MAPK_ACTIVITY	0.0206743	0.000300337	0.020374	0.21465	0.287655	0
TCGA	GOBP_INACTIVATION_OF_MAPK_ACTIVITY	-0.00385243	-0.00698376	0.00313132	0.625537	0.695117	0
TCGA	GOBP_PROTEIN_POLYUBIQUITINATION	0.0187187	-0.0576786	0.0763973	6.75193e-06	2.85788e-05	0
TCGA	GOBP_MEIOTIC_SPINDLE_ORGANIZATION	0.00110219	-0.0563796	0.0574817	0.293594	0.37484	0
TCGA	GOBP_SPLICEOSOMAL_TRI_SNRNP_COMPLEX_ASSEMBLY	-0.0398705	-0.101114	0.0612432	0.529466	0.608892	0
TCGA	GOBP_SPLICEOSOMAL_COMPLEX_ASSEMBLY	-0.0424938	-0.0583608	0.015867	0.978986	0.983637	0
TCGA	GOBP_MITOCHONDRIAL_FISSION	-0.05451	-0.0138369	-0.0406731	0.0350549	0.0598196	0
TCGA	GOBP_POLYSACCHARIDE_BIOSYNTHETIC_PROCESS	-0.0617293	0.00485455	-0.0665839	1.64115e-05	6.4917e-05	0
TCGA	GOBP_POLYSACCHARIDE_CATABOLIC_PROCESS	-0.0457434	-0.0147389	-0.0310045	0.0542573	0.0880294	0
TCGA	GOBP_MITOTIC_CYTOKINESIS	-0.032685	-0.0537284	0.0210434	0.429122	0.513751	0
TCGA	GOBP_NUCLEAR_TRANSCRIBED_MRNA_CATABOLIC_PROCESS_DEADENYLATION_DEPENDENT_DECAY	-0.0684237	-0.0594423	-0.0089814	0.887648	0.912644	0
TCGA	GOBP_NUCLEAR_TRANSCRIBED_MRNA_POLY_A_TAIL_SHORTENING	-0.128492	-0.00750226	-0.120989	0.000379333	0.00107849	0
TCGA	GOBP_DEADENYLATION_DEPENDENT_DECAPPING_OF_NUCLEAR_TRANSCRIBED_MRNA	0.0599323	-0.102221	0.162153	0.000532161	0.00145748	0
TCGA	GOBP_NUCLEAR_TRANSCRIBED_MRNA_CATABOLIC_PROCESS_EXONUCLEOLYTIC	0.0577159	-0.090337	0.148053	0.00270448	0.00620491	0
TCGA	GOBP_RESPONSE_TO_REACTIVE_OXYGEN_SPECIES	-0.00394751	-0.0187404	0.0147929	0.149295	0.211286	0
TCGA	GOBP_RESPONSE_TO_OXYGEN_RADICAL	0.0461712	-0.00206871	0.0482399	0.21465	0.287655	0
TCGA	GOBP_PROTEIN_DENEDDYLATION	-0.00528476	-0.122952	0.117667	0.000526504	0.00144433	0
TCGA	GOBP_RNA_SPLICING_VIA_TRANSESTERIFICATION_REACTIONS	-0.0378452	-0.0903985	0.0525533	0.239313	0.314478	0
TCGA	GOBP_ALTERNATIVE_MRNA_SPLICING_VIA_SPLICEOSOME	-0.0994962	-0.00561781	-0.0938784	0.0619926	0.0986246	0
TCGA	GOBP_REGULATION_OF_ALTERNATIVE_MRNA_SPLICING_VIA_SPLICEOSOME	-0.110222	-0.0135609	-0.0966606	0.020477	0.0373951	0
TCGA	GOBP_SPLICEOSOMAL_SNRNP_ASSEMBLY	0.0264393	-0.0486446	0.075084	0.116997	0.171014	0
TCGA	GOBP_RNA_SPLICING_VIA_ENDONUCLEOLYTIC_CLEAVAGE_AND_LIGATION	0.0175426	-0.0706335	0.0881761	0.0874023	0.133003	0
TCGA	GOBP_PROTEIN_PEPTIDYL_PROLYL_ISOMERIZATION	0.0746283	-0.0464914	0.12112	0.000172538	0.00053918	0
TCGA	GOBP_AUTOPHAGY_OF_MITOCHONDRION	-0.0649231	-0.0438207	-0.0211024	0.657073	0.723507	0
TCGA	GOBP_MITOPHAGY	-0.0857192	-0.0420792	-0.0436399	0.461088	0.545078	0
TCGA	GOBP_MATURATION_OF_5_8S_RRNA	0.059162	-0.10187	0.161032	0.0692874	0.108596	0
TCGA	GOBP_MATURATION_OF_SSU_RRNA_FROM_TRICISTRONIC_RRNA_TRANSCRIPT_SSU_RRNA_5_8S_RRNA_LSU_RRNA	0.0226526	-0.0404445	0.0630971	0.275072	0.354582	0
TCGA	GOBP_MATURATION_OF_LSU_RRNA_FROM_TRICISTRONIC_RRNA_TRANSCRIPT_SSU_RRNA_5_8S_RRNA_LSU_RRNA	0.033459	-0.0980432	0.131502	0.313854	0.395828	0
TCGA	GOBP_MATURATION_OF_5_8S_RRNA_FROM_TRICISTRONIC_RRNA_TRANSCRIPT_SSU_RRNA_5_8S_RRNA_LSU_RRNA	0.0247495	-0.102634	0.127384	0.0664024	0.104656	0
TCGA	GOBP_CLEAVAGE_INVOLVED_IN_RRNA_PROCESSING	0.00657905	-0.0879726	0.0945516	0.0736529	0.114483	0
TCGA	GOBP_MATURATION_OF_LSU_RRNA	0.0202814	-0.0593979	0.0796793	0.348633	0.432171	0
TCGA	GOBP_ENDONUCLEOLYTIC_CLEAVAGE_INVOLVED_IN_RRNA_PROCESSING	-0.0684642	-0.0659066	-0.00255762	0.913429	0.933854	0
TCGA	GOBP_SMALL_NUCLEOLAR_RIBONUCLEOPROTEIN_COMPLEX_ASSEMBLY	-0.0761614	-0.110458	0.0342961	0.282297	0.362239	0
TCGA	GOBP_EMBRYONIC_AXIS_SPECIFICATION	-0.0647637	0.0654938	-0.130257	7.46665e-09	5.27761e-08	0
TCGA	GOBP_RESOLUTION_OF_MEIOTIC_RECOMBINATION_INTERMEDIATES	0.0316292	-0.0798534	0.111483	0.0208977	0.0380674	0
TCGA	GOBP_ALPHA_AMINO_ACID_CATABOLIC_PROCESS	-0.0451684	-0.00231902	-0.0428494	0.138527	0.198036	1
TCGA	GOBP_NUCLEOTIDE_EXCISION_REPAIR_DNA_DUPLEX_UNWINDING	-0.00270754	-0.069696	0.0669885	0.0281717	0.0493856	0
TCGA	GOBP_TELOMERE_MAINTENANCE_VIA_RECOMBINATION	0.0360751	-0.108111	0.144186	0.00655143	0.01366	0
TCGA	GOBP_RECOMBINATIONAL_REPAIR	0.088197	-0.140035	0.228232	0.000127192	0.000409581	0
TCGA	GOBP_NON_RECOMBINATIONAL_REPAIR	0.0220629	-0.0930499	0.115113	7.13682e-05	0.000240501	0
TCGA	GOBP_DOUBLE_STRAND_BREAK_REPAIR_VIA_BREAK_INDUCED_REPLICATION	0.32683	-0.126309	0.453139	2.28467e-05	8.67218e-05	0
TCGA	GOBP_ALPHA_AMINO_ACID_METABOLIC_PROCESS	-0.0585911	0.0132242	-0.0718154	0.0284478	0.0497664	1
TCGA	GOBP_ALPHA_BETA_T_CELL_ACTIVATION	0.292283	-0.105736	0.398019	5.50112e-19	1.51729e-17	1
TCGA	GOBP_DNA_CATABOLIC_PROCESS_ENDONUCLEOLYTIC	0.0289345	-0.0694	0.0983344	0.000295523	0.000865924	0
TCGA	GOBP_SISTER_CHROMATID_SEGREGATION	0.0797401	-0.130452	0.210193	0.00136225	0.00336091	0
TCGA	GOBP_CYTOKINESIS	-0.0302576	-0.0331924	0.00293481	0.535126	0.613871	0
TCGA	GOBP_NUCLEAR_TRANSCRIBED_MRNA_CATABOLIC_PROCESS	-0.0502498	-0.0271342	-0.0231156	0.716232	0.774366	0
TCGA	GOBP_MITOCHONDRIAL_RNA_METABOLIC_PROCESS	-0.0655399	-0.0704832	0.00494339	0.784497	0.830307	0
TCGA	GOBP_MITOCHONDRIAL_RNA_PROCESSING	0.00828504	-0.0707117	0.0789968	0.117445	0.17157	0
TCGA	GOBP_RNA_5_END_PROCESSING	0.0909879	-0.117768	0.208756	0.00756408	0.0155039	0
TCGA	GOBP_RESPONSE_TO_ACID_CHEMICAL	-0.0211617	0.00108216	-0.0222439	0.147949	0.209966	0
TCGA	GOBP_FORMATION_OF_EXTRACHROMOSOMAL_CIRCULAR_DNA	0.00985878	-0.120294	0.130153	0.156447	0.219632	0
TCGA	GOBP_SKELETAL_SYSTEM_DEVELOPMENT	-0.0233546	0.0140972	-0.0374518	0.0183876	0.03402	0
TCGA	GOBP_OSSIFICATION	-0.0457654	0.00196348	-0.0477289	0.0209508	0.0381368	0
TCGA	GOBP_NEUROTRANSMITTER_UPTAKE	0.010331	0.069191	-0.0588601	0.023407	0.0418277	0
TCGA	GOBP_REGULATION_OF_NEUROTRANSMITTER_LEVELS	-0.0272001	0.0441175	-0.0713176	1.97543e-05	7.64707e-05	0
TCGA	GOBP_ACTION_POTENTIAL	-0.0891846	0.0743748	-0.163559	3.58944e-14	5.01829e-13	0
TCGA	GOBP_RNA_METHYLATION	-0.0431412	-0.0567747	0.0136335	0.480531	0.56269	0
TCGA	GOBP_PSEUDOURIDINE_SYNTHESIS	-0.0518546	-0.082657	0.0308024	0.643969	0.711703	0
TCGA	GOBP_CILIUM_OR_FLAGELLUM_DEPENDENT_CELL_MOTILITY	-0.0476144	-0.0285196	-0.0190947	0.56258	0.638152	0
TCGA	GOBP_OVARIAN_FOLLICLE_DEVELOPMENT	0.0135404	0.0165645	-0.00302411	0.494343	0.575279	0
TCGA	GOBP_LUTEINIZATION	-0.127811	0.0398892	-0.1677	3.09829e-05	0.000113366	0
TCGA	GOBP_OOCYTE_MATURATION	0.0665084	-0.0320302	0.0985386	0.000621901	0.00166639	0
TCGA	GOBP_RESPONSE_TO_PROTOZOAN	0.360058	-0.14354	0.503598	8.37696e-23	5.52118e-21	0
TCGA	GOBP_BRANCHING_INVOLVED_IN_BLOOD_VESSEL_MORPHOGENESIS	-0.0481746	0.0272174	-0.075392	0.0197082	0.0361863	0
TCGA	GOBP_VASCULOGENESIS	-0.0701924	0.0354573	-0.10565	0.00765086	0.0156565	0
TCGA	GOBP_GANGLIOSIDE_METABOLIC_PROCESS	0.0278997	-0.0117949	0.0396945	0.0893707	0.135511	0
TCGA	GOBP_GANGLIOSIDE_BIOSYNTHETIC_PROCESS	-0.0178344	0.0139663	-0.0318006	0.363103	0.447813	0
TCGA	GOBP_MICROTUBULE_BUNDLE_FORMATION	-0.0637703	-0.0544017	-0.00936868	0.251773	0.32847	0
TCGA	GOBP_OSTEOBLAST_DIFFERENTIATION	-0.045557	0.0154525	-0.0610095	0.00412752	0.00903675	0
TCGA	GOBP_UROGENITAL_SYSTEM_DEVELOPMENT	-0.0858147	0.0441729	-0.129988	4.5346e-09	3.32559e-08	0
TCGA	GOBP_METANEPHROS_DEVELOPMENT	-0.0903704	0.0766003	-0.166971	1.28434e-09	1.02484e-08	0
TCGA	GOBP_TEMPERATURE_HOMEOSTASIS	-0.0172928	0.00175842	-0.0190512	0.228034	0.302317	0
TCGA	GOBP_FEVER_GENERATION	0.0505226	0.0612567	-0.0107341	0.295359	0.376903	0
TCGA	GOBP_AMEBOIDAL_TYPE_CELL_MIGRATION	-0.0186801	-0.00345631	-0.0152238	0.402239	0.488014	0
TCGA	GOBP_REGULATION_OF_CHROMATIN_ASSEMBLY_OR_DISASSEMBLY	0.0308545	0.00924353	0.021611	0.665404	0.73062	0
TCGA	GOBP_ACROSOME_ASSEMBLY	0.0834427	0.04494	0.0385027	0.138527	0.198036	0
TCGA	GOBP_ALPHA_BETA_T_CELL_DIFFERENTIATION	0.244215	-0.0933902	0.337605	2.43163e-16	4.60468e-15	1
TCGA	GOBP_ALPHA_BETA_T_CELL_PROLIFERATION	0.343056	-0.121179	0.464234	7.42597e-22	3.96703e-20	1
TCGA	GOBP_TRNA_5_LEADER_REMOVAL	0.0513025	-0.143742	0.195045	0.00123656	0.00307172	0
TCGA	GOBP_GASTRIC_ACID_SECRETION	0.0720288	0.0341436	0.0378852	0.0509862	0.0833617	0
TCGA	GOBP_IN_UTERO_EMBRYONIC_DEVELOPMENT	-0.0453902	-0.000124329	-0.0452658	0.00170453	0.00410171	0
TCGA	GOBP_GASTRULATION_WITH_MOUTH_FORMING_SECOND	-0.153126	0.0711491	-0.224276	1.55297e-13	2.02085e-12	0
TCGA	GOBP_FORMATION_OF_PRIMARY_GERM_LAYER	-0.0648766	0.00345719	-0.0683338	0.189601	0.258593	0
TCGA	GOBP_ENDODERM_FORMATION	0.0448082	-0.0391053	0.0839135	0.128609	0.185213	0
TCGA	GOBP_CELL_FATE_SPECIFICATION	-0.064794	0.108331	-0.173125	8.60636e-09	6.02445e-08	0
TCGA	GOBP_CELL_FATE_DETERMINATION	0.0162555	0.0449251	-0.0286695	0.1922	0.261436	0
TCGA	GOBP_MESODERMAL_CELL_FATE_COMMITMENT	-0.0283219	0.0540037	-0.0823256	0.000324084	0.000942536	0
TCGA	GOBP_ENDODERMAL_CELL_FATE_COMMITMENT	-0.0567909	0.015607	-0.0723979	0.204905	0.276421	0
TCGA	GOBP_FORMATION_OF_TRANSLATION_PREINITIATION_COMPLEX	-0.000401695	-0.0561008	0.0556991	0.956841	0.966747	0
TCGA	GOBP_FORMATION_OF_CYTOPLASMIC_TRANSLATION_INITIATION_COMPLEX	-0.0858241	-0.069644	-0.0161801	0.630974	0.699322	0
TCGA	GOBP_MORPHOGENESIS_OF_A_POLARIZED_EPITHELIUM	0.0310461	-0.052788	0.0838341	0.00210403	0.00496419	0
TCGA	GOBP_EYE_PHOTORECEPTOR_CELL_DIFFERENTIATION	-0.0504149	0.0578343	-0.108249	1.38145e-08	9.29821e-08	0
TCGA	GOBP_NEURAL_CREST_CELL_MIGRATION	-0.0161621	0.0597912	-0.0759533	0.00113307	0.00284388	0
TCGA	GOBP_SOMITOGENESIS	-0.0638183	0.0482816	-0.1121	4.3029e-06	1.87928e-05	0
TCGA	GOBP_ORGAN_INDUCTION	-0.115498	0.102641	-0.218139	7.38201e-08	4.45466e-07	0
TCGA	GOBP_MORPHOGENESIS_OF_A_BRANCHING_STRUCTURE	-0.0634397	0.0538762	-0.117316	1.80292e-06	8.50354e-06	0
TCGA	GOBP_NEURON_MIGRATION	-0.0572703	0.0540471	-0.111317	2.27768e-08	1.48195e-07	0
TCGA	GOBP_MEMBRANE_RAFT_ASSEMBLY	0.00424865	-0.0148623	0.0191109	0.463421	0.547199	0
TCGA	GOBP_ESTABLISHMENT_OF_LYMPHOCYTE_POLARITY	0.258181	-0.103866	0.362048	5.0593e-09	3.68378e-08	0
TCGA	GOBP_IMMUNOLOGICAL_SYNAPSE_FORMATION	0.400219	-0.153871	0.55409	6.82873e-17	1.40307e-15	0
TCGA	GOBP_MYELOID_DENDRITIC_CELL_ACTIVATION	0.301063	-0.134681	0.435744	9.95786e-20	3.21886e-18	0
TCGA	GOBP_MICROGLIAL_CELL_ACTIVATION	0.314458	-0.106522	0.42098	8.27128e-11	7.78789e-10	0
TCGA	GOBP_LEUKOCYTE_HOMEOSTASIS	0.207703	-0.0867742	0.294478	1.29528e-14	1.92772e-13	0
TCGA	GOBP_PLASMA_MEMBRANE_REPAIR	-0.0144857	0.0421212	-0.0566069	0.146345	0.207807	0
TCGA	GOBP_NATURAL_KILLER_CELL_DIFFERENTIATION	0.197493	-0.0972394	0.294732	8.27128e-11	7.78789e-10	0
TCGA	GOBP_NEUTROPHIL_HOMEOSTASIS	0.126721	-0.0608829	0.187604	0.00192244	0.00457187	0
TCGA	GOBP_B_CELL_HOMEOSTASIS	0.257549	-0.131131	0.38868	3.35357e-12	3.69184e-11	0
TCGA	GOBP_B_CELL_APOPTOTIC_PROCESS	0.107148	-0.0869745	0.194123	8.80376e-09	6.12882e-08	0
TCGA	GOBP_NATURAL_KILLER_CELL_PROLIFERATION	0.430225	-0.140509	0.570734	2.56118e-21	1.17099e-19	0
TCGA	GOBP_NEGATIVE_REGULATION_OF_CYTOKINE_PRODUCTION	0.166883	-0.0680903	0.234974	3.89395e-17	8.37365e-16	0
TCGA	GOBP_POSITIVE_REGULATION_OF_CYTOKINE_PRODUCTION	0.197386	-0.0773692	0.274755	5.86018e-20	1.996e-18	0
TCGA	GOBP_SEROTONIN_SECRETION	0.221311	0.0100442	0.211267	4.08001e-05	0.000144899	0
TCGA	GOBP_HISTAMINE_SECRETION	0.176284	-0.065968	0.242252	1.50205e-07	8.59403e-07	0
TCGA	GOBP_MESONEPHROS_DEVELOPMENT	-0.0993588	0.0905943	-0.189953	4.96774e-12	5.3641e-11	0
TCGA	GOBP_BLASTOCYST_DEVELOPMENT	-0.0127797	-0.0306344	0.0178546	0.491322	0.572683	0
TCGA	GOBP_BLASTOCYST_FORMATION	-0.016359	0.0116618	-0.0280208	0.552286	0.628723	0
TCGA	GOBP_TROPHECTODERMAL_CELL_DIFFERENTIATION	-0.034956	0.0124264	-0.0473824	0.0460757	0.0762669	0
TCGA	GOBP_BLASTOCYST_GROWTH	0.0231169	-0.039413	0.0625299	0.0119422	0.02315	0
TCGA	GOBP_INNER_CELL_MASS_CELL_PROLIFERATION	0.0128529	-0.0793223	0.0921752	0.0107647	0.0211338	0
TCGA	GOBP_RELEASE_OF_CYTOCHROME_C_FROM_MITOCHONDRIA	0.0415258	-0.0452073	0.086733	0.000705594	0.00186894	0
TCGA	GOBP_EPITHELIAL_TO_MESENCHYMAL_TRANSITION	-0.0480204	0.00539293	-0.0534133	0.00718439	0.0148335	0
TCGA	GOBP_NEURAL_TUBE_FORMATION	-0.115548	0.0011775	-0.116725	1.60624e-08	1.07118e-07	0
TCGA	GOBP_PROTEIN_INSERTION_INTO_MITOCHONDRIAL_MEMBRANE_INVOLVED_IN_APOPTOTIC_SIGNALING_PATHWAY	0.0166305	-0.0549439	0.0715744	0.00672418	0.01398	0
TCGA	GOBP_PHAGOLYSOSOME_ASSEMBLY	0.0446221	-0.0364608	0.0810829	0.00239082	0.00557091	0
TCGA	GOBP_COMPLEMENT_ACTIVATION_LECTIN_PATHWAY	0.0313428	-0.00379089	0.0351337	0.335014	0.417943	0
TCGA	GOBP_RECEPTOR_RECYCLING	-0.0123722	-0.0281673	0.0157951	0.754483	0.805427	0
TCGA	GOBP_ENDOTHELIAL_CELL_DEVELOPMENT	-0.0432879	0.0198237	-0.0631116	0.0151973	0.0287357	0
TCGA	GOBP_ENDOTHELIAL_CELL_MORPHOGENESIS	0.04722	-0.00457899	0.051799	0.947687	0.960557	0
TCGA	GOBP_PLACENTA_DEVELOPMENT	-0.024372	0.00465753	-0.0290295	0.205934	0.277587	0
TCGA	GOBP_EMBRYONIC_PLACENTA_DEVELOPMENT	-0.0456555	0.00749129	-0.0531468	0.222175	0.296175	0
TCGA	GOBP_MATERNAL_PLACENTA_DEVELOPMENT	-0.0641103	0.0316138	-0.0957241	0.000551427	0.00150134	0
TCGA	GOBP_TISSUE_HOMEOSTASIS	-0.01128	0.00139533	-0.0126753	0.813349	0.852664	0
TCGA	GOBP_RETINA_HOMEOSTASIS	0.0479439	0.0114252	0.0365188	0.125035	0.180887	0
TCGA	GOBP_CELL_KILLING	0.30383	-0.0916449	0.395475	5.88192e-25	6.78426e-23	0
TCGA	GOBP_LEUKOCYTE_MEDIATED_CYTOTOXICITY	0.352568	-0.129122	0.481691	1.23956e-24	1.16496e-22	0
TCGA	GOBP_REGULATION_OF_LEUKOCYTE_MEDIATED_CYTOTOXICITY	0.376547	-0.170967	0.547514	3.4556e-24	2.87494e-22	0
TCGA	GOBP_NEGATIVE_REGULATION_OF_LEUKOCYTE_MEDIATED_CYTOTOXICITY	0.454147	-0.209113	0.663259	1.1683e-27	3.70572e-25	0
TCGA	GOBP_AMINO_ACID_ACTIVATION	-0.0729739	-0.0449882	-0.0279857	0.55485	0.630653	1
TCGA	GOBP_AMINO_ACID_BETAINE_METABOLIC_PROCESS	-0.055542	0.00470239	-0.0602444	0.0139227	0.0265332	1
TCGA	GOBP_AMINO_ACID_IMPORT	-0.0326535	2.48919e-05	-0.0326783	0.358573	0.442871	1
TCGA	GOBP_REGULATION_OF_RECEPTOR_RECYCLING	0.0739771	-0.0390417	0.113019	0.000343697	0.000993316	0
TCGA	GOBP_POSITIVE_REGULATION_OF_RECEPTOR_RECYCLING	0.0320065	-0.0211429	0.0531494	0.260191	0.337371	0
TCGA	GOBP_ENDOTHELIAL_CELL_PROLIFERATION	0.0326388	-0.00596938	0.0386082	0.655688	0.722453	0
TCGA	GOBP_NEGATIVE_REGULATION_OF_ENDOTHELIAL_CELL_PROLIFERATION	0.0749929	-0.0258269	0.10082	0.00299878	0.00679108	0
TCGA	GOBP_POSITIVE_REGULATION_OF_ENDOTHELIAL_CELL_PROLIFERATION	-0.00443116	-0.00109502	-0.00333613	0.699845	0.760375	0
TCGA	GOBP_POSTSYNAPTIC_MEMBRANE_ORGANIZATION	-0.0372391	0.0386446	-0.0758838	0.000225884	0.000685622	0
TCGA	GOBP_LYMPH_VESSEL_DEVELOPMENT	-0.0210941	0.00861039	-0.0297045	0.107057	0.158262	0
TCGA	GOBP_LYMPHANGIOGENESIS	-0.025113	0.00296486	-0.0280779	0.275915	0.355308	0
TCGA	GOBP_REGULATION_OF_CELL_MATRIX_ADHESION	-0.0685366	-0.0162539	-0.0522827	0.0409982	0.0688048	0
TCGA	GOBP_NEGATIVE_REGULATION_OF_CELL_MATRIX_ADHESION	-0.0968284	-0.0112808	-0.0855475	0.0300807	0.0522808	0
TCGA	GOBP_POSITIVE_REGULATION_OF_CELL_MATRIX_ADHESION	0.00646504	-0.0216608	0.0281259	0.653614	0.72048	0
TCGA	GOBP_POSITIVE_REGULATION_OF_NEUROTRANSMITTER_SECRETION	0.0352965	-0.0226136	0.0579101	0.346666	0.429943	0
TCGA	GOBP_SYNAPTIC_TRANSMISSION_DOPAMINERGIC	0.070264	0.0652121	0.00505192	0.875555	0.903138	0
TCGA	GOBP_STARTLE_RESPONSE	-0.0101278	0.0606838	-0.0708116	0.000101729	0.000333943	0
TCGA	GOBP_SUCKLING_BEHAVIOR	-0.1158	0.0642145	-0.180015	6.88801e-08	4.17144e-07	0
TCGA	GOBP_BLOOD_VESSEL_REMODELING	0.0470811	0.0174649	0.0296162	0.479936	0.562122	0
TCGA	GOBP_RESPONSE_TO_AMPHETAMINE	0.0714041	-0.0154545	0.0868587	0.0856433	0.130758	0
TCGA	GOBP_RENAL_SYSTEM_PROCESS_INVOLVED_IN_REGULATION_OF_BLOOD_VOLUME	-0.0769924	0.078496	-0.155488	0.0121382	0.0234762	0
TCGA	GOBP_REGULATION_OF_SYSTEMIC_ARTERIAL_BLOOD_PRESSURE_BY_HORMONE	0.00894603	0.0720086	-0.0630626	0.0304462	0.0527894	0
TCGA	GOBP_REGULATION_OF_SYSTEMIC_ARTERIAL_BLOOD_PRESSURE_BY_CIRCULATORY_RENIN_ANGIOTENSIN	0.0529148	0.0190968	0.0338179	0.586076	0.659352	0
TCGA	GOBP_REGULATION_OF_ANGIOTENSIN_LEVELS_IN_BLOOD	0.0728461	0.00180017	0.0710459	0.85221	0.883547	0
TCGA	GOBP_MORPHOGENESIS_OF_AN_EPITHELIAL_SHEET	-0.0753971	0.0174149	-0.092812	0.0103863	0.0204939	0
TCGA	GOBP_RESPONSE_TO_DIETARY_EXCESS	-0.0596087	0.0549133	-0.114522	5.83045e-05	0.000200336	0
TCGA	GOBP_DIET_INDUCED_THERMOGENESIS	-0.0980667	0.05451	-0.152577	5.97433e-05	0.000204863	0
TCGA	GOBP_REGULATION_OF_THE_FORCE_OF_HEART_CONTRACTION	-0.00447024	0.0353102	-0.0397805	0.175767	0.24233	0
TCGA	GOBP_REGULATION_OF_HEART_RATE	-0.0485652	0.0635342	-0.112099	2.43528e-05	9.17523e-05	0
TCGA	GOBP_REGULATION_OF_SODIUM_ION_TRANSPORT	-0.0905164	0.0529269	-0.143443	1.88723e-08	1.24385e-07	0
TCGA	GOBP_G_PROTEIN_COUPLED_RECEPTOR_INTERNALIZATION	-0.00828082	0.0584247	-0.0667055	0.11655	0.170508	0
TCGA	GOBP_SPROUTING_ANGIOGENESIS	-0.0385675	-0.0103856	-0.028182	0.465175	0.54825	0
TCGA	GOBP_CELL_MIGRATION_INVOLVED_IN_SPROUTING_ANGIOGENESIS	-0.0285199	-0.0150721	-0.0134478	0.381061	0.465099	0
TCGA	GOBP_BLOOD_VESSEL_ENDOTHELIAL_CELL_PROLIFERATION_INVOLVED_IN_SPROUTING_ANGIOGENESIS	0.0624864	-0.00238399	0.0648704	0.176379	0.243108	0
TCGA	GOBP_POSITIVE_REGULATION_OF_NEUROBLAST_PROLIFERATION	-0.0649293	0.063926	-0.128855	0.000123769	0.000399827	0
TCGA	GOBP_POSITIVE_REGULATION_OF_MESENCHYMAL_CELL_PROLIFERATION	-0.102478	0.0576621	-0.16014	5.12047e-06	2.21538e-05	0
TCGA	GOBP_CHONDROCYTE_DIFFERENTIATION	0.00477779	-0.00543956	0.0102173	0.285309	0.365735	0
TCGA	GOBP_CHONDROCYTE_DEVELOPMENT	-0.0120716	-0.00720681	-0.0048648	0.737803	0.792119	0
TCGA	GOBP_EPITHELIAL_CELL_DEVELOPMENT	-0.0703732	0.0269948	-0.097368	5.62079e-05	0.000193656	0
TCGA	GOBP_COLUMNAR_CUBOIDAL_EPITHELIAL_CELL_DIFFERENTIATION	-0.0805803	0.0517904	-0.132371	8.95469e-09	6.21683e-08	0
TCGA	GOBP_COLUMNAR_CUBOIDAL_EPITHELIAL_CELL_DEVELOPMENT	-0.0785175	0.0270645	-0.105582	0.000140703	0.000447691	0
TCGA	GOBP_GLANDULAR_EPITHELIAL_CELL_DIFFERENTIATION	-0.0711682	0.0613134	-0.132482	2.46031e-08	1.59464e-07	0
TCGA	GOBP_GLANDULAR_EPITHELIAL_CELL_DEVELOPMENT	-0.0485782	0.0556443	-0.104222	2.03564e-05	7.85022e-05	0
TCGA	GOBP_EPITHELIAL_CELL_MATURATION	-0.0312598	0.0181647	-0.0494244	0.168842	0.23431	0
TCGA	GOBP_OSTEOBLAST_DEVELOPMENT	-0.140012	0.0761769	-0.216189	5.84042e-09	4.21624e-08	0
TCGA	GOBP_REGULATION_OF_OXIDATIVE_PHOSPHORYLATION	-0.0487863	-0.0327752	-0.0160112	0.747941	0.800296	0
TCGA	GOBP_PROTEIN_DEPALMITOYLATION	-0.00450784	-0.0737378	0.06923	0.340808	0.424129	0
TCGA	GOBP_LENS_DEVELOPMENT_IN_CAMERA_TYPE_EYE	-0.0271407	0.0214591	-0.0485998	0.0227135	0.0408039	0
TCGA	GOBP_LENS_MORPHOGENESIS_IN_CAMERA_TYPE_EYE	-0.00916513	0.0188195	-0.0279847	0.0769525	0.119101	0
TCGA	GOBP_REGULATION_OF_RECEPTOR_INTERNALIZATION	-0.0681849	0.0387842	-0.106969	1.27079e-06	6.11304e-06	0
TCGA	GOBP_NEGATIVE_REGULATION_OF_RECEPTOR_INTERNALIZATION	0.0338571	-0.019293	0.0531501	0.306095	0.387776	0
TCGA	GOBP_POSITIVE_REGULATION_OF_RECEPTOR_INTERNALIZATION	-0.0700126	0.0304914	-0.100504	0.000286893	0.000844538	0
TCGA	GOBP_AUDITORY_RECEPTOR_CELL_MORPHOGENESIS	0.0342064	0.014875	0.0193315	0.513289	0.593651	0
TCGA	GOBP_TRNA_WOBBLE_BASE_MODIFICATION	0.0203762	-0.0721753	0.0925514	0.0249729	0.0443294	0
TCGA	GOBP_STORE_OPERATED_CALCIUM_ENTRY	0.0568154	-0.0160317	0.0728471	0.0381498	0.0645583	0
TCGA	GOBP_CYTOPLASMIC_TRANSLATION	-0.00820305	-0.0403915	0.0321885	0.673777	0.737898	0
TCGA	GOBP_CYTOPLASMIC_TRANSLATIONAL_ELONGATION	-0.125337	-0.033265	-0.0920724	0.763231	0.813056	0
TCGA	GOBP_CYTOPLASMIC_TRANSLATIONAL_INITIATION	-0.0555823	-0.0535563	-0.00202596	0.904318	0.926405	0
TCGA	GOBP_SOMATIC_DIVERSIFICATION_OF_IMMUNE_RECEPTORS	0.122689	-0.107546	0.230234	7.1691e-17	1.46117e-15	0
TCGA	GOBP_ACTIVATION_OF_INNATE_IMMUNE_RESPONSE	0.176613	-0.095701	0.272314	7.58584e-21	3.07985e-19	0
TCGA	GOBP_PATTERN_RECOGNITION_RECEPTOR_SIGNALING_PATHWAY	0.147734	-0.0647453	0.212479	9.851e-14	1.30532e-12	0
TCGA	GOBP_TOLL_LIKE_RECEPTOR_SIGNALING_PATHWAY	0.163462	-0.0557053	0.219168	1.35589e-12	1.56034e-11	0
TCGA	GOBP_INNATE_IMMUNE_RESPONSE_IN_MUCOSA	0.135424	0.0666346	0.0687893	0.0527174	0.0858328	0
TCGA	GOBP_NATURAL_KILLER_CELL_MEDIATED_IMMUNITY	0.383364	-0.16187	0.545234	1.22763e-29	1.03837e-26	0
TCGA	GOBP_POSITIVE_REGULATION_OF_DEFENSE_RESPONSE_TO_VIRUS_BY_HOST	0.252324	-0.130535	0.382859	2.48693e-27	7.01175e-25	0
TCGA	GOBP_RESPONSE_TO_MOLECULE_OF_BACTERIAL_ORIGIN	0.162752	-0.0406546	0.203406	1.38043e-11	1.40395e-10	0
TCGA	GOBP_HEMATOPOIETIC_PROGENITOR_CELL_DIFFERENTIATION	0.0642157	-0.0564374	0.120653	2.88245e-10	2.50487e-09	0
TCGA	GOBP_ADAPTIVE_IMMUNE_RESPONSE	0.31388	-0.133557	0.447437	3.5588e-24	2.91305e-22	0
TCGA	GOBP_ORGAN_OR_TISSUE_SPECIFIC_IMMUNE_RESPONSE	0.0802077	0.0377551	0.0424525	0.191223	0.260245	0
TCGA	GOBP_ACTIVATION_OF_IMMUNE_RESPONSE	0.214239	-0.0953982	0.309637	1.64528e-25	2.2196e-23	0
TCGA	GOBP_LYMPHOCYTE_HOMEOSTASIS	0.261812	-0.0948625	0.356675	4.58819e-18	1.06812e-16	0
TCGA	GOBP_MYELOID_CELL_HOMEOSTASIS	0.00640906	-0.0415725	0.0479815	0.00134872	0.00333077	0
TCGA	GOBP_MAST_CELL_ACTIVATION_INVOLVED_IN_IMMUNE_RESPONSE	0.206761	-0.0747477	0.281509	4.11985e-10	3.49636e-09	0
TCGA	GOBP_MACROPHAGE_ACTIVATION_INVOLVED_IN_IMMUNE_RESPONSE	0.3017	-0.110819	0.412519	9.71674e-13	1.14149e-11	0
TCGA	GOBP_LYMPHOCYTE_ACTIVATION_INVOLVED_IN_IMMUNE_RESPONSE	0.203711	-0.081066	0.284777	1.00435e-18	2.66863e-17	0
TCGA	GOBP_AMINO_ACID_TRANSMEMBRANE_TRANSPORT	0.0419569	0.014478	0.0274789	0.138272	0.197894	1
TCGA	GOBP_T_CELL_ACTIVATION_VIA_T_CELL_RECEPTOR_CONTACT_WITH_ANTIGEN_BOUND_TO_MHC_MOLECULE_ON_ANTIGEN_PRESENTING_CELL	0.450452	-0.13136	0.581812	7.75018e-14	1.04607e-12	0
TCGA	GOBP_AMINO_ACID_TRANSPORT	0.00750611	0.0306352	-0.0231291	0.0835704	0.128094	1
TCGA	GOBP_T_HELPER_CELL_LINEAGE_COMMITMENT	0.337115	-0.120623	0.457737	2.5852e-18	6.39994e-17	0
TCGA	GOBP_B_CELL_ACTIVATION_INVOLVED_IN_IMMUNE_RESPONSE	0.190367	-0.109105	0.299472	5.20422e-18	1.206e-16	0
TCGA	GOBP_MATURE_B_CELL_DIFFERENTIATION_INVOLVED_IN_IMMUNE_RESPONSE	0.290185	-0.113777	0.403962	4.55013e-12	4.94473e-11	0
TCGA	GOBP_LYMPHOID_PROGENITOR_CELL_DIFFERENTIATION	0.0138192	-0.0156088	0.0294281	0.719812	0.777078	0
TCGA	GOBP_NATURAL_KILLER_CELL_ACTIVATION_INVOLVED_IN_IMMUNE_RESPONSE	0.295403	-0.000629845	0.296033	3.16241e-21	1.43297e-19	0
TCGA	GOBP_IMMATURE_B_CELL_DIFFERENTIATION	-0.0592187	0.0300151	-0.0892338	0.0049717	0.0106642	0
TCGA	GOBP_PRO_B_CELL_DIFFERENTIATION	-0.0423083	0.0120011	-0.0543094	0.12177	0.176717	0
TCGA	GOBP_MATURE_B_CELL_DIFFERENTIATION	0.305105	-0.114856	0.419961	7.50522e-13	8.89929e-12	0
TCGA	GOBP_RESPONSE_TO_TUMOR_CELL	0.255027	-0.0824398	0.337467	2.64942e-17	5.74607e-16	0
TCGA	GOBP_ANTIGEN_PROCESSING_AND_PRESENTATION	0.194875	-0.0978221	0.292697	2.62947e-20	9.60041e-19	1
TCGA	GOBP_CYTOKINE_PRODUCTION_INVOLVED_IN_IMMUNE_RESPONSE	0.247909	-0.0717228	0.319632	1.43448e-16	2.8217e-15	0
TCGA	GOBP_ANTIGEN_PROCESSING_AND_PRESENTATION_OF_ENDOGENOUS_ANTIGEN	0.426133	-0.187792	0.613924	7.65496e-21	3.08325e-19	1
TCGA	GOBP_DENDRITIC_CELL_CYTOKINE_PRODUCTION	0.267544	-0.105121	0.372665	1.46501e-11	1.48401e-10	0
TCGA	GOBP_IMMUNOGLOBULIN_PRODUCTION	0.181255	-0.0917605	0.273015	6.54453e-26	1.14529e-23	0
TCGA	GOBP_IMMUNOGLOBULIN_PRODUCTION_INVOLVED_IN_IMMUNOGLOBULIN_MEDIATED_IMMUNE_RESPONSE	0.138548	-0.10093	0.239479	3.14403e-20	1.10805e-18	0
TCGA	GOBP_DENDRITIC_CELL_CHEMOTAXIS	0.34189	-0.1605	0.502391	1.40373e-17	3.12453e-16	0
TCGA	GOBP_IMMUNE_RESPONSE_TO_TUMOR_CELL	0.25198	-0.112728	0.364708	1.52239e-22	9.42213e-21	0
TCGA	GOBP_COMPLEMENT_RECEPTOR_MEDIATED_SIGNALING_PATHWAY	0.31571	-0.0361429	0.351853	1.08853e-06	5.29146e-06	0
TCGA	GOBP_FC_RECEPTOR_MEDIATED_STIMULATORY_SIGNALING_PATHWAY	0.130199	-0.100835	0.231035	8.59559e-10	6.96847e-09	0
TCGA	GOBP_INFLAMMATORY_RESPONSE_TO_ANTIGENIC_STIMULUS	0.26067	-0.0489473	0.309617	3.17222e-20	1.11028e-18	0
TCGA	GOBP_ACUTE_INFLAMMATORY_RESPONSE_TO_ANTIGENIC_STIMULUS	0.30198	-0.0601043	0.362085	2.79932e-20	1.01475e-18	0
TCGA	GOBP_PRODUCTION_OF_MOLECULAR_MEDIATOR_OF_IMMUNE_RESPONSE	0.204639	-0.0912456	0.295884	6.41619e-23	4.28449e-21	0
TCGA	GOBP_LYMPHOCYTE_MEDIATED_IMMUNITY	0.277286	-0.116796	0.394082	4.72206e-25	5.70582e-23	0
TCGA	GOBP_HUMORAL_IMMUNE_RESPONSE_MEDIATED_BY_CIRCULATING_IMMUNOGLOBULIN	0.233463	-0.0280944	0.261558	6.72442e-12	7.16942e-11	0
TCGA	GOBP_ANTIGEN_PROCESSING_AND_PRESENTATION_OF_ENDOGENOUS_PEPTIDE_ANTIGEN	0.476469	-0.19176	0.668228	2.15973e-25	2.81042e-23	1
TCGA	GOBP_ADAPTIVE_IMMUNE_RESPONSE_BASED_ON_SOMATIC_RECOMBINATION_OF_IMMUNE_RECEPTORS_BUILT_FROM_IMMUNOGLOBULIN_SUPERFAMILY_DOMAINS	0.267344	-0.100062	0.367406	6.70348e-22	3.65808e-20	0
TCGA	GOBP_GERMINAL_CENTER_FORMATION	0.286874	-0.0928915	0.379766	5.77446e-15	8.96189e-14	0
TCGA	GOBP_DENDRITIC_CELL_ANTIGEN_PROCESSING_AND_PRESENTATION	0.316578	-0.163354	0.479932	6.16238e-12	6.58401e-11	0
TCGA	GOBP_ANTIGEN_PROCESSING_AND_PRESENTATION_OF_EXOGENOUS_PEPTIDE_ANTIGEN_VIA_MHC_CLASS_I	0.316251	-0.156354	0.472605	1.5718e-24	1.45034e-22	1
TCGA	GOBP_ANTIGEN_PROCESSING_AND_PRESENTATION_VIA_MHC_CLASS_IB	0.349574	-0.133874	0.483447	2.04008e-13	2.62112e-12	0
TCGA	GOBP_ANTIGEN_PROCESSING_AND_PRESENTATION_OF_PEPTIDE_ANTIGEN	0.188679	-0.0982765	0.286956	5.65601e-20	1.93948e-18	1
TCGA	GOBP_ANTIGEN_PROCESSING_AND_PRESENTATION_OF_PEPTIDE_ANTIGEN_VIA_MHC_CLASS_I	0.243314	-0.124935	0.36825	1.78758e-22	1.05488e-20	1
TCGA	GOBP_TOLERANCE_INDUCTION	0.381573	-0.129797	0.511369	6.39983e-24	4.99679e-22	0
TCGA	GOBP_T_CELL_TOLERANCE_INDUCTION	0.433265	-0.162563	0.595828	2.46884e-21	1.13903e-19	0
TCGA	GOBP_LEUKOCYTE_MIGRATION_INVOLVED_IN_INFLAMMATORY_RESPONSE	0.225258	-0.0554789	0.280737	8.754e-09	6.10255e-08	0
TCGA	GOBP_HYPERSENSITIVITY	0.402946	-0.0764756	0.479422	4.90304e-21	2.10872e-19	0
TCGA	GOBP_ACUTE_INFLAMMATORY_RESPONSE	0.128655	0.00868172	0.119973	7.94757e-10	6.47414e-09	0
TCGA	GOBP_PRODUCTION_OF_MOLECULAR_MEDIATOR_INVOLVED_IN_INFLAMMATORY_RESPONSE	0.182586	-0.072299	0.254885	2.05875e-14	2.98519e-13	0
TCGA	GOBP_CYTOKINE_PRODUCTION_INVOLVED_IN_INFLAMMATORY_RESPONSE	0.228045	-0.0754153	0.30346	3.35871e-14	4.7613e-13	0
TCGA	GOBP_CHRONIC_INFLAMMATORY_RESPONSE	0.361279	-0.12054	0.481819	2.15066e-23	1.53727e-21	0
TCGA	GOBP_MONOCYTE_CHEMOTAXIS	0.263441	-0.100789	0.36423	2.58732e-15	4.26319e-14	0
TCGA	GOBP_SOMATIC_DIVERSIFICATION_OF_IMMUNE_RECEPTORS_VIA_SOMATIC_MUTATION	0.196992	-0.134248	0.33124	2.47509e-06	1.13675e-05	0
TCGA	GOBP_MYELOID_LEUKOCYTE_DIFFERENTIATION	0.134105	-0.0509493	0.185054	1.83559e-08	1.21297e-07	0
TCGA	GOBP_PLATELET_DEGRANULATION	0.013707	-0.00681756	0.0205245	0.243159	0.318707	0
TCGA	GOBP_ANTIGEN_PROCESSING_AND_PRESENTATION_OF_PEPTIDE_OR_POLYSACCHARIDE_ANTIGEN_VIA_MHC_CLASS_II	0.0996317	-0.058382	0.158014	2.50125e-08	1.615e-07	1
TCGA	GOBP_REGULATION_OF_DENDRITIC_CELL_ANTIGEN_PROCESSING_AND_PRESENTATION	0.307382	-0.123884	0.431266	1.13163e-11	1.16966e-10	0
TCGA	GOBP_REGULATION_OF_IMMUNOGLOBULIN_PRODUCTION	0.200558	-0.0821821	0.28274	7.92532e-22	4.18968e-20	0
TCGA	GOBP_NEGATIVE_REGULATION_OF_IMMUNOGLOBULIN_PRODUCTION	0.174569	-0.0644719	0.239041	2.36589e-07	1.30937e-06	0
TCGA	GOBP_POSITIVE_REGULATION_OF_IMMUNOGLOBULIN_PRODUCTION	0.198465	-0.0883379	0.286803	1.8049e-24	1.63569e-22	0
TCGA	GOBP_REGULATION_OF_TOLERANCE_INDUCTION	0.389384	-0.121729	0.511112	9.60044e-21	3.77692e-19	0
TCGA	GOBP_POSITIVE_REGULATION_OF_TOLERANCE_INDUCTION	0.424219	-0.121481	0.5457	6.93391e-20	2.33044e-18	0
TCGA	GOBP_REGULATION_OF_ACUTE_INFLAMMATORY_RESPONSE	0.126232	-0.0262319	0.152464	3.95778e-08	2.47361e-07	0
TCGA	GOBP_NEGATIVE_REGULATION_OF_ACUTE_INFLAMMATORY_RESPONSE	0.102091	0.0257341	0.0763569	0.0161878	0.0303484	0
TCGA	GOBP_POSITIVE_REGULATION_OF_ACUTE_INFLAMMATORY_RESPONSE	0.150891	-0.0290947	0.179985	4.82957e-07	2.52161e-06	0
TCGA	GOBP_RESPIRATORY_BURST_INVOLVED_IN_DEFENSE_RESPONSE	0.245135	-0.0886459	0.333781	3.48503e-14	4.91292e-13	0
TCGA	GOBP_NEGATIVE_REGULATION_OF_IMMUNE_SYSTEM_PROCESS	0.221667	-0.0839376	0.305604	1.42788e-19	4.47314e-18	0
TCGA	GOBP_REGULATION_OF_LEUKOCYTE_MIGRATION	0.166796	-0.0546263	0.221422	5.4592e-11	5.29741e-10	0
TCGA	GOBP_NEGATIVE_REGULATION_OF_LEUKOCYTE_MIGRATION	0.208418	-0.0604917	0.26891	2.67611e-10	2.33757e-09	0
TCGA	GOBP_POSITIVE_REGULATION_OF_LEUKOCYTE_MIGRATION	0.146222	-0.0703523	0.216575	8.53856e-11	7.99506e-10	0
TCGA	GOBP_REGULATION_OF_LEUKOCYTE_CHEMOTAXIS	0.183932	-0.0646637	0.248596	2.52807e-13	3.19948e-12	0
TCGA	GOBP_NEGATIVE_REGULATION_OF_LEUKOCYTE_CHEMOTAXIS	0.223784	-0.0155231	0.239308	1.47036e-10	1.33014e-09	0
TCGA	GOBP_POSITIVE_REGULATION_OF_LEUKOCYTE_CHEMOTAXIS	0.186607	-0.0680982	0.254706	6.27217e-14	8.60304e-13	0
TCGA	GOBP_REGULATION_OF_CELLULAR_EXTRAVASATION	0.192407	-0.0491342	0.241541	1.70135e-07	9.63655e-07	0
TCGA	GOBP_POSITIVE_REGULATION_OF_CELLULAR_EXTRAVASATION	0.0823561	-0.0528707	0.135227	0.000446496	0.00124847	0
TCGA	GOBP_REGULATION_OF_IMMUNE_EFFECTOR_PROCESS	0.218386	-0.090163	0.308549	1.11951e-20	4.33703e-19	0
TCGA	GOBP_NEGATIVE_REGULATION_OF_IMMUNE_EFFECTOR_PROCESS	0.225311	-0.0867815	0.312093	2.23832e-18	5.65148e-17	0
TCGA	GOBP_POSITIVE_REGULATION_OF_IMMUNE_EFFECTOR_PROCESS	0.254202	-0.0866189	0.34082	9.60044e-21	3.77692e-19	0
TCGA	GOBP_REGULATION_OF_PRODUCTION_OF_MOLECULAR_MEDIATOR_OF_IMMUNE_RESPONSE	0.224021	-0.0948559	0.318877	2.17083e-21	1.02009e-19	0
TCGA	GOBP_NEGATIVE_REGULATION_OF_PRODUCTION_OF_MOLECULAR_MEDIATOR_OF_IMMUNE_RESPONSE	0.264085	-0.0918088	0.355894	2.92251e-19	8.42712e-18	0
TCGA	GOBP_POSITIVE_REGULATION_OF_PRODUCTION_OF_MOLECULAR_MEDIATOR_OF_IMMUNE_RESPONSE	0.216956	-0.088154	0.30511	6.52588e-24	5.01801e-22	0
TCGA	GOBP_REGULATION_OF_LEUKOCYTE_MEDIATED_IMMUNITY	0.267954	-0.0966931	0.364647	6.62019e-21	2.7315e-19	0
TCGA	GOBP_NEGATIVE_REGULATION_OF_LEUKOCYTE_MEDIATED_IMMUNITY	0.349674	-0.142715	0.492389	3.56305e-23	2.44358e-21	0
TCGA	GOBP_POSITIVE_REGULATION_OF_LEUKOCYTE_MEDIATED_IMMUNITY	0.315514	-0.121973	0.437487	2.01952e-26	4.45611e-24	0
TCGA	GOBP_REGULATION_OF_LYMPHOCYTE_MEDIATED_IMMUNITY	0.308207	-0.1216	0.429807	1.16802e-24	1.13994e-22	0
TCGA	GOBP_NEGATIVE_REGULATION_OF_LYMPHOCYTE_MEDIATED_IMMUNITY	0.350628	-0.136018	0.486646	5.37675e-25	6.34582e-23	0
TCGA	GOBP_AROMATIC_AMINO_ACID_FAMILY_CATABOLIC_PROCESS	0.116231	-0.0296774	0.145909	2.39422e-05	9.02723e-05	1
TCGA	GOBP_AROMATIC_AMINO_ACID_FAMILY_METABOLIC_PROCESS	0.0625541	-0.00609118	0.0686453	0.0543773	0.0881677	1
TCGA	GOBP_ASPARTATE_FAMILY_AMINO_ACID_BIOSYNTHETIC_PROCESS	-0.011393	-0.0194541	0.00806109	0.44437	0.529012	1
TCGA	GOBP_REGULATION_OF_B_CELL_MEDIATED_IMMUNITY	0.205112	-0.100499	0.305611	1.38192e-21	6.74349e-20	0
TCGA	GOBP_NEGATIVE_REGULATION_OF_B_CELL_MEDIATED_IMMUNITY	0.119119	-0.0274215	0.14654	0.00102363	0.00259747	0
TCGA	GOBP_POSITIVE_REGULATION_OF_B_CELL_MEDIATED_IMMUNITY	0.222549	-0.116468	0.339017	2.19249e-26	4.63621e-24	0
TCGA	GOBP_REGULATION_OF_NATURAL_KILLER_CELL_MEDIATED_IMMUNITY	0.434589	-0.201809	0.636398	3.8416e-29	2.65722e-26	0
TCGA	GOBP_NEGATIVE_REGULATION_OF_NATURAL_KILLER_CELL_MEDIATED_IMMUNITY	0.47249	-0.202899	0.67539	1.15074e-30	1.94667e-27	0
TCGA	GOBP_POSITIVE_REGULATION_OF_NATURAL_KILLER_CELL_MEDIATED_IMMUNITY	0.444567	-0.1972	0.641767	6.13725e-28	2.22475e-25	0
TCGA	GOBP_NEGATIVE_REGULATION_OF_CYTOKINE_PRODUCTION_INVOLVED_IN_IMMUNE_RESPONSE	0.327651	-0.125379	0.45303	2.12089e-20	7.91435e-19	0
TCGA	GOBP_POSITIVE_REGULATION_OF_CYTOKINE_PRODUCTION_INVOLVED_IN_IMMUNE_RESPONSE	0.252265	-0.10741	0.359675	3.53803e-19	1.0031e-17	0
TCGA	GOBP_NEGATIVE_REGULATION_OF_T_CELL_CYTOKINE_PRODUCTION	0.36244	-0.113773	0.476213	8.18406e-26	1.33807e-23	0
TCGA	GOBP_ASPARTATE_FAMILY_AMINO_ACID_CATABOLIC_PROCESS	-0.105971	-0.0232289	-0.0827422	0.0919274	0.138931	1
TCGA	GOBP_CYTOPLASMIC_PATTERN_RECOGNITION_RECEPTOR_SIGNALING_PATHWAY	0.0900266	-0.0785431	0.16857	9.29537e-14	1.23816e-12	0
TCGA	GOBP_MYD88_DEPENDENT_TOLL_LIKE_RECEPTOR_SIGNALING_PATHWAY	0.214021	-0.0997807	0.313801	8.93725e-13	1.0548e-11	0
TCGA	GOBP_MYD88_INDEPENDENT_TOLL_LIKE_RECEPTOR_SIGNALING_PATHWAY	0.199899	-0.125453	0.325352	1.48127e-16	2.90249e-15	0
TCGA	GOBP_INNATE_IMMUNE_RESPONSE_ACTIVATING_SIGNAL_TRANSDUCTION	0.181371	-0.0885087	0.26988	1.74666e-19	5.27637e-18	0
TCGA	GOBP_REGULATION_OF_ANTIMICROBIAL_HUMORAL_RESPONSE	0.214043	0.0401793	0.173864	2.011e-06	9.40627e-06	0
TCGA	GOBP_REGULATION_OF_MYELOID_LEUKOCYTE_DIFFERENTIATION	0.15161	-0.0522943	0.203905	3.89387e-08	2.43667e-07	0
TCGA	GOBP_NEGATIVE_REGULATION_OF_MYELOID_LEUKOCYTE_DIFFERENTIATION	0.162559	-0.0604545	0.223013	9.42272e-09	6.51503e-08	0
TCGA	GOBP_POSITIVE_REGULATION_OF_MYELOID_LEUKOCYTE_DIFFERENTIATION	0.133791	-0.0592019	0.192993	6.13283e-07	3.14703e-06	0
TCGA	GOBP_IMMUNE_RESPONSE_REGULATING_SIGNALING_PATHWAY	0.236656	-0.104689	0.341345	2.81606e-23	1.98493e-21	0
TCGA	GOBP_IMMUNE_RESPONSE_INHIBITING_SIGNAL_TRANSDUCTION	0.460308	-0.0861076	0.546416	4.18275e-18	9.91936e-17	0
TCGA	GOBP_PEPTIDE_SECRETION	-0.0258698	0.0264326	-0.0523024	3.15075e-05	0.000115036	0
TCGA	GOBP_REGULATION_OF_PEPTIDE_SECRETION	-0.0224033	0.0300285	-0.0524318	0.000363088	0.00104047	0
TCGA	GOBP_NEGATIVE_REGULATION_OF_PEPTIDE_SECRETION	0.0202637	0.012644	0.00761973	0.34178	0.425026	0
TCGA	GOBP_POSITIVE_REGULATION_OF_PEPTIDE_SECRETION	-0.0121413	0.0298902	-0.0420316	0.0248493	0.0441254	0
TCGA	GOBP_REGULATION_OF_ADAPTIVE_IMMUNE_RESPONSE	0.256871	-0.102864	0.359735	2.75678e-22	1.57198e-20	0
TCGA	GOBP_NEGATIVE_REGULATION_OF_ADAPTIVE_IMMUNE_RESPONSE	0.27823	-0.0950168	0.373246	9.27998e-20	3.01897e-18	0
TCGA	GOBP_POSITIVE_REGULATION_OF_ADAPTIVE_IMMUNE_RESPONSE	0.254921	-0.114422	0.369343	8.58676e-25	9.07196e-23	0
TCGA	GOBP_REGULATION_OF_T_HELPER_1_TYPE_IMMUNE_RESPONSE	0.356218	-0.133854	0.490072	4.14769e-18	9.91936e-17	0
TCGA	GOBP_POSITIVE_REGULATION_OF_T_HELPER_1_TYPE_IMMUNE_RESPONSE	0.342294	-0.134215	0.476509	5.69432e-19	1.55369e-17	0
TCGA	GOBP_REGULATION_OF_TYPE_2_IMMUNE_RESPONSE	0.204017	-0.0478235	0.25184	5.13817e-12	5.51294e-11	0
TCGA	GOBP_NEGATIVE_REGULATION_OF_TYPE_2_IMMUNE_RESPONSE	0.113447	-0.0304439	0.143891	0.000261423	0.000778592	0
TCGA	GOBP_POSITIVE_REGULATION_OF_TYPE_2_IMMUNE_RESPONSE	0.294547	-0.094944	0.389491	1.24069e-15	2.13441e-14	0
TCGA	GOBP_REGULATION_OF_RESPONSE_TO_BIOTIC_STIMULUS	0.205684	-0.0915003	0.297184	8.94254e-30	9.07668e-27	0
TCGA	GOBP_NEGATIVE_REGULATION_OF_RESPONSE_TO_BIOTIC_STIMULUS	0.207498	-0.109303	0.316802	4.41903e-28	1.86888e-25	0
TCGA	GOBP_POSITIVE_REGULATION_OF_RESPONSE_TO_BIOTIC_STIMULUS	0.229628	-0.0995035	0.329131	9.60272e-29	4.87338e-26	0
TCGA	GOBP_REGULATION_OF_RESPONSE_TO_TUMOR_CELL	0.222231	-0.0989663	0.321197	6.69141e-18	1.52968e-16	0
TCGA	GOBP_POSITIVE_REGULATION_OF_RESPONSE_TO_TUMOR_CELL	0.236906	-0.0820053	0.318911	5.03557e-15	7.83911e-14	0
TCGA	GOBP_REGULATION_OF_INFLAMMATORY_RESPONSE_TO_ANTIGENIC_STIMULUS	0.335823	-0.136216	0.472038	2.70545e-22	1.56024e-20	0
TCGA	GOBP_NEGATIVE_REGULATION_OF_INFLAMMATORY_RESPONSE_TO_ANTIGENIC_STIMULUS	0.285461	-0.0673111	0.352772	2.06228e-19	6.15652e-18	0
TCGA	GOBP_POSITIVE_REGULATION_OF_INFLAMMATORY_RESPONSE_TO_ANTIGENIC_STIMULUS	0.360684	-0.141229	0.501913	4.65988e-17	9.97844e-16	0
TCGA	GOBP_REGULATION_OF_ACUTE_INFLAMMATORY_RESPONSE_TO_ANTIGENIC_STIMULUS	0.368568	-0.119814	0.488382	2.11176e-21	1.0016e-19	0
TCGA	GOBP_REGULATION_OF_MYELOID_LEUKOCYTE_MEDIATED_IMMUNITY	0.193582	-0.0693191	0.262901	1.42119e-09	1.12696e-08	0
TCGA	GOBP_POSITIVE_REGULATION_OF_MYELOID_LEUKOCYTE_MEDIATED_IMMUNITY	0.284527	-0.0596958	0.344223	6.94739e-14	9.42727e-13	0
TCGA	GOBP_REGULATION_OF_B_CELL_APOPTOTIC_PROCESS	0.100992	-0.0731575	0.17415	8.6553e-09	6.04204e-08	0
TCGA	GOBP_NEGATIVE_REGULATION_OF_B_CELL_APOPTOTIC_PROCESS	0.00216476	-0.0569952	0.05916	0.0154398	0.029129	0
TCGA	GOBP_REGULATION_OF_HUMORAL_IMMUNE_RESPONSE	0.211428	-0.0389734	0.250401	7.94998e-12	8.37057e-11	0
TCGA	GOBP_NEGATIVE_REGULATION_OF_HUMORAL_IMMUNE_RESPONSE	0.0807195	0.00703898	0.0736805	0.0297911	0.0518484	0
TCGA	GOBP_POSITIVE_REGULATION_OF_HUMORAL_IMMUNE_RESPONSE	0.349388	-0.0592987	0.408687	2.40175e-21	1.11825e-19	0
TCGA	GOBP_REGULATION_OF_HUMORAL_IMMUNE_RESPONSE_MEDIATED_BY_CIRCULATING_IMMUNOGLOBULIN	0.276702	-0.081713	0.358415	9.77662e-12	1.01882e-10	0
TCGA	GOBP_RESPONSE_TO_ISCHEMIA	-0.0265286	0.0159312	-0.0424598	0.0207918	0.0378882	0
TCGA	GOBP_DESMOSOME_ORGANIZATION	-0.0251819	-0.0481062	0.0229244	0.454128	0.538859	0
TCGA	GOBP_REGIONALIZATION	-0.060451	0.0620353	-0.122486	3.39949e-12	3.72622e-11	0
TCGA	GOBP_HEART_MORPHOGENESIS	-0.0792265	0.0522601	-0.131487	3.4638e-06	1.54607e-05	0
TCGA	GOBP_SKELETAL_MUSCLE_CONTRACTION	0.012517	0.0209312	-0.00841426	0.914189	0.934443	0
TCGA	GOBP_MUSCLE_SYSTEM_PROCESS	-0.0130044	0.0183518	-0.0313562	0.0656968	0.103737	0
TCGA	GOBP_RENAL_SYSTEM_PROCESS	-0.0697839	0.04117	-0.110954	0.000282668	0.000834519	0
TCGA	GOBP_HEART_PROCESS	-0.0339017	0.0379338	-0.0718356	0.00111035	0.00279377	0
TCGA	GOBP_RESPIRATORY_SYSTEM_PROCESS	-0.0562907	0.0420628	-0.0983535	0.00600405	0.0125963	0
TCGA	GOBP_VASCULAR_PROCESS_IN_CIRCULATORY_SYSTEM	-0.0499524	0.0395395	-0.0894919	0.00065214	0.00174098	0
TCGA	GOBP_REGULATION_OF_SYSTEMIC_ARTERIAL_BLOOD_PRESSURE_MEDIATED_BY_A_CHEMICAL_SIGNAL	-0.0307564	0.0562907	-0.0870471	0.0439242	0.0731589	0
TCGA	GOBP_RENAL_SYSTEM_PROCESS_INVOLVED_IN_REGULATION_OF_SYSTEMIC_ARTERIAL_BLOOD_PRESSURE	-0.0264725	0.098699	-0.125172	0.00401643	0.00881635	0
TCGA	GOBP_REGULATION_OF_SYSTEMIC_ARTERIAL_BLOOD_PRESSURE	-0.00989393	0.0575133	-0.0674073	0.0351379	0.0599411	0
TCGA	GOBP_REGULATION_OF_SYSTEMIC_ARTERIAL_BLOOD_PRESSURE_BY_RENIN_ANGIOTENSIN	0.0754376	0.0508102	0.0246274	0.379501	0.46353	0
TCGA	GOBP_POSITIVE_REGULATION_OF_SYSTEMIC_ARTERIAL_BLOOD_PRESSURE	0.0159343	0.0799763	-0.064042	0.0891903	0.135319	0
TCGA	GOBP_NEGATIVE_REGULATION_OF_SYSTEMIC_ARTERIAL_BLOOD_PRESSURE	0.0258475	0.0497611	-0.0239136	0.628933	0.697516	0
TCGA	GOBP_RENAL_WATER_HOMEOSTASIS	-0.0663421	0.0575451	-0.123887	1.16249e-05	4.70091e-05	0
TCGA	GOBP_REGULATION_OF_GLOMERULAR_FILTRATION	-0.111961	0.0140882	-0.126049	0.0956815	0.143834	0
TCGA	GOBP_HEART_FIELD_SPECIFICATION	-0.0626613	0.0594026	-0.122064	0.000145687	0.000462678	0
TCGA	GOBP_SECONDARY_HEART_FIELD_SPECIFICATION	-0.0738134	0.0810991	-0.154913	0.000621901	0.00166639	0
TCGA	GOBP_EMBRYONIC_HEART_TUBE_MORPHOGENESIS	-0.0652022	0.0303706	-0.0955728	7.3215e-06	3.06826e-05	0
TCGA	GOBP_OUTFLOW_TRACT_SEPTUM_MORPHOGENESIS	-0.115315	0.0971773	-0.212492	0.00237567	0.00554069	0
TCGA	GOBP_OUTFLOW_TRACT_MORPHOGENESIS	-0.105589	0.0571153	-0.162704	3.84984e-05	0.000137301	0
TCGA	GOBP_REGULATION_OF_ANIMAL_ORGAN_FORMATION	-0.122361	0.118513	-0.240874	3.49265e-08	2.20463e-07	0
TCGA	GOBP_ENDOCARDIUM_DEVELOPMENT	-0.0864605	0.0492238	-0.135684	0.00726726	0.0149802	0
TCGA	GOBP_ENDOTHELIUM_DEVELOPMENT	-0.0787134	0.030475	-0.109188	0.0232902	0.0416629	0
TCGA	GOBP_MORPHOGENESIS_OF_AN_ENDOTHELIUM	0.0991201	-0.0745923	0.173712	0.000728094	0.00192052	0
TCGA	GOBP_CARDIAC_CONDUCTION_SYSTEM_DEVELOPMENT	-0.0871285	0.075616	-0.162744	1.14724e-05	4.64666e-05	0
TCGA	GOBP_HEART_VALVE_DEVELOPMENT	-0.0536096	0.0224023	-0.0760119	0.00445089	0.00966136	0
TCGA	GOBP_ATRIOVENTRICULAR_VALVE_DEVELOPMENT	-0.172306	0.0822962	-0.254602	8.49264e-10	6.89603e-09	0
TCGA	GOBP_MITRAL_VALVE_DEVELOPMENT	-0.209319	0.0785156	-0.287835	2.06364e-09	1.59649e-08	0
TCGA	GOBP_PULMONARY_VALVE_DEVELOPMENT	-0.0719774	0.0452116	-0.117189	0.0346425	0.0591955	0
TCGA	GOBP_AORTIC_VALVE_MORPHOGENESIS	-0.0820704	0.0618915	-0.143962	0.0428315	0.0715032	0
TCGA	GOBP_PULMONARY_VALVE_MORPHOGENESIS	-0.116734	0.0845551	-0.20129	0.00162285	0.0039275	0
TCGA	GOBP_HEART_VALVE_FORMATION	-0.126588	0.093104	-0.219692	6.47609e-07	3.30645e-06	0
TCGA	GOBP_ENDOCARDIAL_CUSHION_DEVELOPMENT	-0.105296	0.0759208	-0.181217	4.85141e-05	0.000169565	0
TCGA	GOBP_EPITHELIAL_TO_MESENCHYMAL_TRANSITION_INVOLVED_IN_ENDOCARDIAL_CUSHION_FORMATION	-0.0949955	-0.00236244	-0.0926331	0.0188674	0.0348189	0
TCGA	GOBP_ENDOCARDIAL_CUSHION_MORPHOGENESIS	-0.105658	0.0656793	-0.171337	0.000196404	0.000607404	0
TCGA	GOBP_CARDIAC_CHAMBER_DEVELOPMENT	-0.0828961	0.0419579	-0.124854	5.63407e-06	2.41291e-05	0
TCGA	GOBP_CARDIAC_CHAMBER_MORPHOGENESIS	-0.0751222	0.0535657	-0.128688	2.01826e-05	7.79505e-05	0
TCGA	GOBP_CARDIAC_CHAMBER_FORMATION	-0.173618	0.129295	-0.302914	4.17826e-08	2.6018e-07	0
TCGA	GOBP_CARDIAC_VENTRICLE_MORPHOGENESIS	-0.0163097	0.0593954	-0.0757051	0.000110927	0.00036133	0
TCGA	GOBP_CARDIAC_ATRIUM_MORPHOGENESIS	-0.0842462	0.0864207	-0.170667	4.9723e-05	0.000172957	0
TCGA	GOBP_CARDIAC_LEFT_VENTRICLE_MORPHOGENESIS	-0.0969039	0.0991574	-0.196061	0.00104825	0.00265199	0
TCGA	GOBP_CARDIAC_RIGHT_VENTRICLE_MORPHOGENESIS	-0.074569	0.101617	-0.176186	7.28869e-06	3.05956e-05	0
TCGA	GOBP_VENTRICULAR_TRABECULA_MYOCARDIUM_MORPHOGENESIS	-0.0768617	0.0761666	-0.153028	0.00431888	0.00939894	0
TCGA	GOBP_VENTRICULAR_CARDIAC_MUSCLE_TISSUE_DEVELOPMENT	-0.0190682	0.0360883	-0.0551565	0.00489824	0.0105244	0
TCGA	GOBP_CARDIAC_ATRIUM_DEVELOPMENT	-0.0543789	0.0586716	-0.113051	9.58763e-05	0.000315956	0
TCGA	GOBP_CARDIAC_VENTRICLE_DEVELOPMENT	-0.0850169	0.0691866	-0.154203	1.48935e-06	7.11047e-06	0
TCGA	GOBP_REGULATION_OF_MEMBRANE_DEPOLARIZATION	-0.0636239	0.0704872	-0.134111	1.21265e-07	7.09007e-07	0
TCGA	GOBP_ENDOCARDIAL_CUSHION_FORMATION	-0.119092	0.0492503	-0.168342	0.000438519	0.00122752	0
TCGA	GOBP_CARDIAC_SEPTUM_DEVELOPMENT	-0.101931	0.0375258	-0.139456	2.45606e-05	9.24666e-05	0
TCGA	GOBP_VENTRICULAR_SEPTUM_DEVELOPMENT	-0.14162	0.0607661	-0.202386	7.11305e-07	3.57767e-06	0
TCGA	GOBP_ATRIAL_SEPTUM_DEVELOPMENT	-0.0475097	0.0722465	-0.119756	0.000753875	0.00198029	0
TCGA	GOBP_MUSCLE_HYPERTROPHY_IN_RESPONSE_TO_STRESS	-0.0413122	0.057019	-0.0983312	0.00266227	0.00611912	0
TCGA	GOBP_PHYSIOLOGICAL_CARDIAC_MUSCLE_HYPERTROPHY	-0.0446621	0.0137034	-0.0583655	0.00584807	0.0123098	0
TCGA	GOBP_WNT_SIGNALING_PATHWAY_INVOLVED_IN_HEART_DEVELOPMENT	-0.00225882	0.0740211	-0.0762799	0.0104149	0.0205186	0
TCGA	GOBP_TYPE_B_PANCREATIC_CELL_DEVELOPMENT	-0.076534	0.0497084	-0.126242	1.55795e-05	6.19155e-05	0
TCGA	GOBP_ASPARTATE_FAMILY_AMINO_ACID_METABOLIC_PROCESS	-0.0647764	-0.0126035	-0.0521729	0.235889	0.310541	1
TCGA	GOBP_KERATINOCYTE_DEVELOPMENT	0.0224397	-0.0316294	0.0540691	0.11194	0.16438	0
TCGA	GOBP_MESENCHYMAL_TO_EPITHELIAL_TRANSITION_INVOLVED_IN_METANEPHROS_MORPHOGENESIS	0.115705	0.0283618	0.0873429	0.00549823	0.0116898	0
TCGA	GOBP_METANEPHROS_MORPHOGENESIS	-0.0471293	0.0620752	-0.109204	0.000127192	0.000409581	0
TCGA	GOBP_CILIUM_MOVEMENT	-0.0836711	-0.0378891	-0.045782	0.415277	0.500602	0
TCGA	GOBP_REGULATION_OF_CILIUM_MOVEMENT	0.0406579	-0.00630876	0.0469667	0.751573	0.802828	0
TCGA	GOBP_POSITIVE_REGULATION_OF_CILIUM_MOVEMENT	0.0927873	0.0697599	0.0230274	0.811863	0.851634	0
TCGA	GOBP_REGULATION_OF_CILIUM_BEAT_FREQUENCY	-0.00601745	-0.042621	0.0366035	0.314776	0.396694	0
TCGA	GOBP_EPITHELIAL_CELL_MORPHOGENESIS	-0.0237411	0.0351634	-0.0589045	0.000390537	0.00110725	0
TCGA	GOBP_AXIS_ELONGATION	-0.175976	0.0724858	-0.248461	1.66877e-13	2.16599e-12	0
TCGA	GOBP_NEURAL_RETINA_DEVELOPMENT	-0.0728324	0.0762025	-0.149035	3.23689e-14	4.60147e-13	0
TCGA	GOBP_CHONDROCYTE_DIFFERENTIATION_INVOLVED_IN_ENDOCHONDRAL_BONE_MORPHOGENESIS	-0.012763	0.0176106	-0.0303736	0.424107	0.509189	0
TCGA	GOBP_GROWTH_PLATE_CARTILAGE_DEVELOPMENT	0.0366024	-0.0191535	0.0557559	0.232125	0.30662	0
TCGA	GOBP_DETECTION_OF_CALCIUM_ION	0.0137132	0.0181674	-0.0044542	0.994268	0.995249	0
TCGA	GOBP_POLYSACCHARIDE_METABOLIC_PROCESS	-0.0492385	0.00649071	-0.0557292	0.000936789	0.00239869	0
TCGA	GOBP_DISACCHARIDE_METABOLIC_PROCESS	-0.0271514	0.0510854	-0.0782368	0.00324087	0.00726476	0
TCGA	GOBP_MONOSACCHARIDE_METABOLIC_PROCESS	-0.0500566	-0.00205263	-0.048004	0.000617534	0.00165819	0
TCGA	GOBP_FRUCTOSE_METABOLIC_PROCESS	-0.00980966	-0.00376447	-0.00604519	0.695592	0.756565	0
TCGA	GOBP_FRUCTOSE_6_PHOSPHATE_METABOLIC_PROCESS	0.00136381	-0.034384	0.0357478	0.252169	0.328902	0
TCGA	GOBP_FUCOSE_METABOLIC_PROCESS	0.0722947	-0.0160815	0.0883762	0.00737204	0.0151654	0
TCGA	GOBP_BASIC_AMINO_ACID_TRANSPORT	0.0097974	0.0236489	-0.0138515	0.644656	0.712307	1
TCGA	GOBP_BRANCHED_CHAIN_AMINO_ACID_METABOLIC_PROCESS	-0.220334	0.00404236	-0.224376	5.99863e-05	0.000205419	1
TCGA	GOBP_GALACTOSE_METABOLIC_PROCESS	-0.0257129	-0.0168454	-0.00886751	0.729868	0.785429	0
TCGA	GOBP_INOSITOL_METABOLIC_PROCESS	-0.0775412	-0.00710863	-0.0704325	0.0211108	0.0384005	0
TCGA	GOBP_AMINOGLYCAN_METABOLIC_PROCESS	-0.0579816	0.00410196	-0.0620835	0.276338	0.355581	0
TCGA	GOBP_AMINOGLYCAN_BIOSYNTHETIC_PROCESS	-0.0746406	-0.0093177	-0.0653229	0.0375304	0.0635314	0
TCGA	GOBP_AMINOGLYCAN_CATABOLIC_PROCESS	-0.0261523	0.0100992	-0.0362515	0.4576	0.542092	0
TCGA	GOBP_PROTEOGLYCAN_METABOLIC_PROCESS	-0.0322241	0.00201235	-0.0342365	0.149565	0.211551	0
TCGA	GOBP_AMINO_SUGAR_METABOLIC_PROCESS	0.0254435	-0.00412069	0.0295642	0.0175508	0.0326385	0
TCGA	GOBP_N_ACETYLGLUCOSAMINE_METABOLIC_PROCESS	0.0247326	-0.0404524	0.065185	0.0777556	0.120125	0
TCGA	GOBP_UDP_N_ACETYLGLUCOSAMINE_METABOLIC_PROCESS	0.0540337	-0.0586261	0.11266	5.6929e-07	2.94211e-06	0
TCGA	GOBP_UDP_N_ACETYLGLUCOSAMINE_BIOSYNTHETIC_PROCESS	0.131052	-0.10914	0.240192	4.74277e-10	3.99163e-09	0
TCGA	GOBP_N_ACETYLNEURAMINATE_METABOLIC_PROCESS	0.147564	-0.0966807	0.244245	3.8985e-10	3.31961e-09	0
TCGA	GOBP_URONIC_ACID_METABOLIC_PROCESS	0.070936	0.0249536	0.0459825	0.79778	0.841907	0
TCGA	GOBP_ALCOHOL_METABOLIC_PROCESS	-0.0342857	0.00566891	-0.0399546	0.00138968	0.00341531	0
TCGA	GOBP_ETHANOL_METABOLIC_PROCESS	-0.0385715	0.0809	-0.119472	0.00158078	0.00383666	0
TCGA	GOBP_ETHANOL_CATABOLIC_PROCESS	-0.0686679	0.096151	-0.164819	7.70231e-05	0.000258356	0
TCGA	GOBP_ETHANOL_OXIDATION	-0.077857	0.0446365	-0.122493	0.0524838	0.0854798	0
TCGA	GOBP_CELLULAR_GLUCAN_METABOLIC_PROCESS	-0.067976	-0.0027311	-0.0652449	1.04706e-06	5.09473e-06	0
TCGA	GOBP_CELLULAR_ALDEHYDE_METABOLIC_PROCESS	-0.0770037	0.0223078	-0.0993115	0.00167689	0.00405057	0
TCGA	GOBP_ACETYL_COA_METABOLIC_PROCESS	-0.13956	-0.0164242	-0.123135	0.00116403	0.00291006	0
TCGA	GOBP_ACETYL_COA_BIOSYNTHETIC_PROCESS	-0.106563	-0.0291818	-0.0773809	0.0225997	0.0406426	0
TCGA	GOBP_ACETYL_COA_BIOSYNTHETIC_PROCESS_FROM_PYRUVATE	-0.0952354	-0.0196029	-0.0756325	0.187669	0.256302	0
TCGA	GOBP_LACTATE_METABOLIC_PROCESS	-0.0893379	-0.0378711	-0.0514668	0.0674007	0.105999	0
TCGA	GOBP_PYRUVATE_METABOLIC_PROCESS	-0.0113651	-0.0288075	0.0174425	0.427446	0.512471	0
TCGA	GOBP_CD4_POSITIVE_ALPHA_BETA_T_CELL_ACTIVATION	0.239512	-0.0822267	0.321738	5.20272e-16	9.32997e-15	1
TCGA	GOBP_2_OXOGLUTARATE_METABOLIC_PROCESS	-0.121901	0.00947666	-0.131378	0.0533053	0.0866232	0
TCGA	GOBP_REGULATION_OF_CARBOHYDRATE_METABOLIC_PROCESS	-0.0307867	-0.0113716	-0.0194151	0.0852949	0.130265	0
TCGA	GOBP_REGULATION_OF_GLUCONEOGENESIS	-0.107907	0.00616351	-0.114071	5.65096e-08	3.4511e-07	0
TCGA	GOBP_ENERGY_RESERVE_METABOLIC_PROCESS	-0.0648591	0.0153387	-0.0801978	2.26515e-08	1.47569e-07	0
TCGA	GOBP_OXIDATIVE_PHOSPHORYLATION	-0.0454931	-0.0751489	0.0296559	0.28144	0.361232	0
TCGA	GOBP_MITOCHONDRIAL_ELECTRON_TRANSPORT_NADH_TO_UBIQUINONE	-0.03826	-0.0880356	0.0497757	0.580159	0.654	0
TCGA	GOBP_MITOCHONDRIAL_ELECTRON_TRANSPORT_UBIQUINOL_TO_CYTOCHROME_C	-0.0750974	-0.100288	0.0251902	0.372785	0.456977	0
TCGA	GOBP_MITOCHONDRIAL_ELECTRON_TRANSPORT_CYTOCHROME_C_TO_OXYGEN	-0.0756711	-0.0833156	0.00764453	0.503463	0.584552	0
TCGA	GOBP_REGULATION_OF_NUCLEOTIDE_METABOLIC_PROCESS	-0.0134538	-0.0245575	0.0111037	0.326914	0.409147	0
TCGA	GOBP_PURINE_NUCLEOBASE_METABOLIC_PROCESS	0.119872	-0.06076	0.180632	0.000231039	0.000698346	0
TCGA	GOBP_PURINE_NUCLEOSIDE_CATABOLIC_PROCESS	0.0941495	-0.0776261	0.171776	3.21752e-05	0.000117221	0
TCGA	GOBP_CAMP_BIOSYNTHETIC_PROCESS	-0.109693	0.0819469	-0.19164	4.32271e-06	1.88631e-05	0
TCGA	GOBP_CGMP_BIOSYNTHETIC_PROCESS	-0.0165212	0.0834215	-0.0999428	0.0177338	0.0329546	0
TCGA	GOBP_GTP_BIOSYNTHETIC_PROCESS	0.0167405	-0.0818773	0.0986178	0.627573	0.696465	0
TCGA	GOBP_IMP_BIOSYNTHETIC_PROCESS	0.0857353	-0.0800701	0.165805	0.000604603	0.00162864	0
TCGA	GOBP_PYRIMIDINE_NUCLEOBASE_METABOLIC_PROCESS	0.0183413	-0.0257697	0.044111	0.200829	0.271644	0
TCGA	GOBP_PYRIMIDINE_NUCLEOSIDE_METABOLIC_PROCESS	0.190731	-0.0911557	0.281886	3.27211e-19	9.38189e-18	0
TCGA	GOBP_PYRIMIDINE_NUCLEOTIDE_METABOLIC_PROCESS	0.0077399	-0.0567931	0.064533	0.0255989	0.0453612	0
TCGA	GOBP_PYRIMIDINE_NUCLEOTIDE_BIOSYNTHETIC_PROCESS	-0.0043718	-0.069151	0.0647792	0.0401532	0.0675879	0
TCGA	GOBP_UMP_BIOSYNTHETIC_PROCESS	-0.0463165	-0.0476494	0.00133297	0.685004	0.747451	0
TCGA	GOBP_PYRIMIDINE_NUCLEOTIDE_CATABOLIC_PROCESS	-0.00858631	-0.0442381	0.0356518	0.123394	0.178768	0
TCGA	GOBP_CD4_POSITIVE_ALPHA_BETA_T_CELL_CYTOKINE_PRODUCTION	0.221109	-0.0224897	0.243598	1.39393e-12	1.59688e-11	1
TCGA	GOBP_CD4_POSITIVE_ALPHA_BETA_T_CELL_DIFFERENTIATION	0.251138	-0.0930573	0.344195	2.64772e-15	4.33457e-14	1
TCGA	GOBP_MITOCHONDRIAL_DNA_REPLICATION	0.074609	-0.12041	0.195019	0.000203993	0.000627054	0
TCGA	GOBP_DNA_LIGATION	0.0130878	-0.0905788	0.103667	9.70208e-05	0.000319313	0
TCGA	GOBP_DNA_UNWINDING_INVOLVED_IN_DNA_REPLICATION	0.100431	-0.127002	0.227433	0.00076708	0.00200874	0
TCGA	GOBP_CD4_POSITIVE_OR_CD8_POSITIVE_ALPHA_BETA_T_CELL_LINEAGE_COMMITMENT	0.299634	-0.115176	0.41481	2.47068e-16	4.66123e-15	1
TCGA	GOBP_DNA_STRAND_ELONGATION_INVOLVED_IN_DNA_REPLICATION	0.149868	-0.163329	0.313197	0.00396794	0.00872121	0
TCGA	GOBP_CD8_POSITIVE_ALPHA_BETA_T_CELL_ACTIVATION	0.359934	-0.131704	0.491637	2.55984e-20	9.41389e-19	1
TCGA	GOBP_RNA_DEPENDENT_DNA_BIOSYNTHETIC_PROCESS	-0.0367527	-0.0841198	0.0473672	0.171827	0.237867	0
TCGA	GOBP_CELLULAR_AMINO_ACID_BIOSYNTHETIC_PROCESS	-0.0941943	0.00270531	-0.0968996	3.13756e-05	0.000114637	1
TCGA	GOBP_TRANSCRIPTION_COUPLED_NUCLEOTIDE_EXCISION_REPAIR	-0.00817629	-0.0932651	0.0850889	0.0116535	0.0226335	0
TCGA	GOBP_BASE_EXCISION_REPAIR	0.00977993	-0.071093	0.0808729	0.114557	0.167979	0
TCGA	GOBP_BASE_EXCISION_REPAIR_AP_SITE_FORMATION	-0.0765601	-0.0275376	-0.0490225	0.714801	0.773149	0
TCGA	GOBP_NUCLEOTIDE_EXCISION_REPAIR	-0.0255756	-0.0733355	0.0477599	0.0800407	0.123392	0
TCGA	GOBP_NUCLEOTIDE_EXCISION_REPAIR_PREINCISION_COMPLEX_STABILIZATION	-0.0193401	-0.0673159	0.0479758	0.123394	0.178768	0
TCGA	GOBP_NUCLEOTIDE_EXCISION_REPAIR_PREINCISION_COMPLEX_ASSEMBLY	0.0260664	-0.0850138	0.11108	0.0100197	0.0198245	0
TCGA	GOBP_CELLULAR_AMINO_ACID_CATABOLIC_PROCESS	-0.0598092	-0.00252032	-0.0572889	0.0150774	0.0285407	1
TCGA	GOBP_MISMATCH_REPAIR	-0.00110105	-0.0905928	0.0894917	0.00145087	0.00355366	0
TCGA	GOBP_POSTREPLICATION_REPAIR	0.107951	-0.133571	0.241522	2.05919e-06	9.62282e-06	0
TCGA	GOBP_DOUBLE_STRAND_BREAK_REPAIR	0.0743161	-0.0988539	0.17317	0.000171879	0.000538115	0
TCGA	GOBP_DNA_MODIFICATION	0.0220087	-0.0472152	0.0692239	0.0214341	0.0389049	0
TCGA	GOBP_CELLULAR_AMINO_ACID_METABOLIC_PROCESS	-0.0215784	-0.0210785	-0.00049995	0.462254	0.546075	1
TCGA	GOBP_DNA_DEALKYLATION_INVOLVED_IN_DNA_REPAIR	-0.085492	-0.0427967	-0.0426954	0.545899	0.62341	0
TCGA	GOBP_CELLULAR_GLUCOSE_HOMEOSTASIS	-0.070314	0.0349161	-0.10523	9.50003e-14	1.26211e-12	1
TCGA	GOBP_APOPTOTIC_DNA_FRAGMENTATION	0.0824457	-0.0637373	0.146183	7.15884e-06	3.01003e-05	0
TCGA	GOBP_DNA_RECOMBINATION	0.0868098	-0.11008	0.19689	3.57246e-07	1.91247e-06	0
TCGA	GOBP_MITOTIC_RECOMBINATION	0.0327539	-0.0900543	0.122808	0.0166169	0.0310383	0
TCGA	GOBP_DNA_PACKAGING	0.0372309	-0.096536	0.133767	0.00678266	0.0140843	0
TCGA	GOBP_CHROMATIN_ASSEMBLY_OR_DISASSEMBLY	0.00355427	-0.106935	0.110489	0.0588467	0.0942997	0
TCGA	GOBP_NUCLEOSOME_ASSEMBLY	0.0353466	-0.165054	0.200401	0.000479776	0.00133198	0
TCGA	GOBP_CHROMATIN_REMODELING	-0.0136263	-0.0603473	0.046721	0.597992	0.669936	0
TCGA	GOBP_CHROMATIN_SILENCING	0.0156207	-0.086184	0.101805	0.00278201	0.00634834	0
TCGA	GOBP_CELLULAR_MODIFIED_AMINO_ACID_BIOSYNTHETIC_PROCESS	-0.0521977	-0.0324608	-0.0197369	0.892947	0.917164	1
TCGA	GOBP_CHROMATIN_SILENCING_AT_TELOMERE	0.014736	-0.0823398	0.0970757	0.00309356	0.00697771	0
TCGA	GOBP_REGULATION_OF_GENE_EXPRESSION_BY_GENETIC_IMPRINTING	-0.0824378	-0.00100813	-0.0814297	0.00078593	0.0020528	0
TCGA	GOBP_DNA_TEMPLATED_TRANSCRIPTION_INITIATION	-0.050667	-0.0249716	-0.0256954	0.0375304	0.0635314	0
TCGA	GOBP_DNA_TEMPLATED_TRANSCRIPTION_TERMINATION	0.0102923	-0.102914	0.113206	0.0847746	0.129627	0
TCGA	GOBP_DNA_TEMPLATED_TRANSCRIPTION_ELONGATION	-0.0661201	-0.0512451	-0.014875	0.543354	0.621064	0
TCGA	GOBP_REGULATION_OF_TRANSCRIPTION_BY_RNA_POLYMERASE_I	-0.0463169	-0.0317789	-0.014538	0.749394	0.801174	0
TCGA	GOBP_REGULATION_OF_TRANSCRIPTION_BY_RNA_POLYMERASE_III	-0.0673238	-0.0368059	-0.0305179	0.508364	0.588894	0
TCGA	GOBP_TRANSCRIPTION_BY_RNA_POLYMERASE_I	-0.068068	-0.0610872	-0.00698078	0.927116	0.943855	0
TCGA	GOBP_TRANSCRIPTION_INITIATION_FROM_RNA_POLYMERASE_I_PROMOTER	-0.0886228	-0.0704049	-0.0182179	0.714087	0.772541	0
TCGA	GOBP_TRANSCRIPTION_ELONGATION_FROM_RNA_POLYMERASE_I_PROMOTER	-0.0334655	-0.0607068	0.0272413	0.430801	0.515154	0
TCGA	GOBP_TERMINATION_OF_RNA_POLYMERASE_I_TRANSCRIPTION	-0.0158962	-0.0658571	0.0499609	0.26141	0.338605	0
TCGA	GOBP_TRANSCRIPTION_INITIATION_FROM_RNA_POLYMERASE_II_PROMOTER	-0.0465079	-0.0254082	-0.0210996	0.199819	0.270711	0
TCGA	GOBP_TRANSCRIPTION_ELONGATION_FROM_RNA_POLYMERASE_II_PROMOTER	-0.0718789	-0.0509268	-0.0209521	0.575577	0.649845	0
TCGA	GOBP_TERMINATION_OF_RNA_POLYMERASE_II_TRANSCRIPTION	0.0103398	-0.144712	0.155052	0.00488367	0.0105064	0
TCGA	GOBP_MRNA_SPLICE_SITE_SELECTION	-0.0906073	-0.0518967	-0.0387105	0.394216	0.478967	0
TCGA	GOBP_MRNA_CLEAVAGE	0.0382451	-0.0987825	0.137028	0.0391406	0.0660807	0
TCGA	GOBP_TRANSCRIPTION_BY_RNA_POLYMERASE_III	-0.0457158	-0.0421354	-0.0035804	0.483516	0.565662	0
TCGA	GOBP_MITOCHONDRIAL_TRANSCRIPTION	-0.0889264	-0.0684843	-0.0204421	0.898251	0.921306	0
TCGA	GOBP_TRNA_METABOLIC_PROCESS	-0.0329973	-0.0642388	0.0312415	0.223994	0.298052	0
TCGA	GOBP_TRNA_MODIFICATION	-0.0564927	-0.0678618	0.0113691	0.377944	0.461851	0
TCGA	GOBP_RNA_CATABOLIC_PROCESS	0.0302758	-0.0369313	0.0672071	0.0353878	0.0603269	0
TCGA	GOBP_RNA_LOCALIZATION	-0.0202011	-0.0758281	0.055627	0.174244	0.240688	0
TCGA	GOBP_RNA_EXPORT_FROM_NUCLEUS	0.00345262	-0.0727047	0.0761573	0.210434	0.283051	0
TCGA	GOBP_MRNA_EXPORT_FROM_NUCLEUS	-0.00540553	-0.0891838	0.0837783	0.311559	0.393519	0
TCGA	GOBP_TRANSLATIONAL_INITIATION	-0.0474684	-0.0323325	-0.0151359	0.633701	0.70219	0
TCGA	GOBP_TRANSLATIONAL_ELONGATION	-0.0201673	-0.044246	0.0240787	0.262632	0.340014	0
TCGA	GOBP_TRANSLATIONAL_TERMINATION	-0.0274591	-0.0518951	0.0244361	0.120849	0.175532	0
TCGA	GOBP_REGULATION_OF_TRANSLATIONAL_INITIATION	-0.00730315	-0.0481721	0.0408689	0.424107	0.509189	0
TCGA	GOBP_REGULATION_OF_TRANSLATIONAL_ELONGATION	-0.0479051	-0.0605483	0.0126432	0.27423	0.353677	0
TCGA	GOBP_REGULATION_OF_TRANSLATIONAL_TERMINATION	-0.0564422	-0.0569432	0.00050102	0.521345	0.601735	0
TCGA	GOBP_REGULATION_OF_TRANSLATIONAL_FIDELITY	-0.0587865	-0.0494318	-0.00935471	0.59202	0.664713	0
TCGA	GOBP_PROTEIN_FOLDING	0.0227096	-0.0377059	0.0604155	0.0305198	0.0528808	0
TCGA	GOBP_DE_NOVO_PROTEIN_FOLDING	0.0280727	-0.041838	0.0699107	0.0310389	0.0536155	0
TCGA	GOBP_SIGNAL_PEPTIDE_PROCESSING	-0.0947148	-0.0154188	-0.079296	0.375875	0.459876	0
TCGA	GOBP_PROTEIN_DEPHOSPHORYLATION	-0.00665803	-0.00916481	0.00250678	0.925594	0.943251	0
TCGA	GOBP_PROTEIN_ADP_RIBOSYLATION	0.123639	-0.0428652	0.166504	8.75845e-11	8.18585e-10	0
TCGA	GOBP_PROTEIN_ACETYLATION	-0.0597104	-0.0398676	-0.0198429	0.0987723	0.147693	0
TCGA	GOBP_CELLULAR_MODIFIED_AMINO_ACID_CATABOLIC_PROCESS	-0.0183893	0.0216916	-0.0400809	0.0633439	0.100491	1
TCGA	GOBP_PROTEIN_METHYLATION	-0.0850284	-0.0160542	-0.0689741	0.00990924	0.019629	0
TCGA	GOBP_PROTEIN_DEMETHYLATION	-0.0909104	0.0159295	-0.10684	0.000155557	0.000490648	0
TCGA	GOBP_PROTEIN_N_LINKED_GLYCOSYLATION	-0.0337276	-0.038555	0.00482741	0.92027	0.938956	0
TCGA	GOBP_OLIGOSACCHARIDE_LIPID_INTERMEDIATE_BIOSYNTHETIC_PROCESS	-0.128376	-0.0367393	-0.0916365	0.069729	0.109119	0
TCGA	GOBP_N_GLYCAN_PROCESSING	0.0170736	0.00901975	0.00805389	0.25376	0.330637	0
TCGA	GOBP_PROTEIN_O_LINKED_GLYCOSYLATION	-0.0880883	0.0140004	-0.102089	3.68177e-09	2.72376e-08	0
TCGA	GOBP_GPI_ANCHOR_METABOLIC_PROCESS	-0.151608	-0.026473	-0.125135	0.000493725	0.00136399	0
TCGA	GOBP_MEMBRANE_PROTEIN_ECTODOMAIN_PROTEOLYSIS	0.0253848	-0.0421712	0.067556	0.00249937	0.00579457	0
TCGA	GOBP_PROTEIN_MONOUBIQUITINATION	-0.00731916	-0.0521798	0.0448606	0.138527	0.198036	0
TCGA	GOBP_PROTEIN_QUALITY_CONTROL_FOR_MISFOLDED_OR_INCOMPLETELY_SYNTHESIZED_PROTEINS	-0.0713978	-0.0370056	-0.0343922	0.104168	0.154442	0
TCGA	GOBP_GLYCOPROTEIN_CATABOLIC_PROCESS	0.0925591	-0.0374733	0.130032	0.000486704	0.00134827	0
TCGA	GOBP_PROTEIN_DEGLYCOSYLATION	-0.0718082	-0.0387551	-0.0330531	0.216781	0.290204	0
TCGA	GOBP_CELLULAR_MODIFIED_AMINO_ACID_METABOLIC_PROCESS	-0.0113818	-0.000407559	-0.0109743	0.578194	0.652509	1
TCGA	GOBP_CELLULAR_RESPONSE_TO_FATTY_ACID	0.00235289	0.00744428	-0.00509138	0.550366	0.6271	1
TCGA	GOBP_ARGININE_METABOLIC_PROCESS	-0.0883474	0.0123138	-0.100661	0.0283094	0.0495928	0
TCGA	GOBP_ARGININE_CATABOLIC_PROCESS	-0.107319	0.0494473	-0.156766	1.76891e-06	8.3509e-06	0
TCGA	GOBP_CYSTEINE_METABOLIC_PROCESS	-0.131706	-0.00814381	-0.123562	0.00849685	0.017173	0
TCGA	GOBP_GLUTAMATE_METABOLIC_PROCESS	-0.130856	0.0184572	-0.149314	0.000508051	0.00140052	0
TCGA	GOBP_GLUTAMINE_METABOLIC_PROCESS	-0.0187293	-0.00147594	-0.0172534	0.529466	0.608892	0
TCGA	GOBP_GLYCINE_METABOLIC_PROCESS	-0.0315193	-0.00924559	-0.0222737	0.748667	0.800735	0
TCGA	GOBP_HISTIDINE_METABOLIC_PROCESS	-0.0145656	0.0063259	-0.0208915	0.471638	0.554708	0
TCGA	GOBP_LYSINE_METABOLIC_PROCESS	-0.132159	0.0197125	-0.151871	0.000203993	0.000627054	0
TCGA	GOBP_METHIONINE_METABOLIC_PROCESS	-0.0363809	0.024229	-0.06061	0.0769525	0.119101	0
TCGA	GOBP_L_PHENYLALANINE_METABOLIC_PROCESS	-0.0339661	-0.00989716	-0.0240689	0.769081	0.817914	0
TCGA	GOBP_PROLINE_METABOLIC_PROCESS	-0.210146	0.0423379	-0.252484	5.05161e-07	2.62404e-06	0
TCGA	GOBP_L_SERINE_METABOLIC_PROCESS	-0.046289	-0.0452677	-0.00102133	0.988919	0.990676	0
TCGA	GOBP_TRYPTOPHAN_METABOLIC_PROCESS	0.181352	-0.0393318	0.220684	1.16473e-10	1.06313e-09	0
TCGA	GOBP_TRYPTOPHAN_CATABOLIC_PROCESS	0.236051	-0.0442284	0.280279	5.8185e-15	8.97535e-14	0
TCGA	GOBP_TYROSINE_METABOLIC_PROCESS	-0.0692304	0.0683661	-0.137597	0.000874687	0.00225905	0
TCGA	GOBP_CELLULAR_RESPONSE_TO_GLUCOSE_STARVATION	-0.120935	-0.0112861	-0.109649	3.61126e-06	1.60623e-05	1
TCGA	GOBP_CELLULAR_BIOGENIC_AMINE_METABOLIC_PROCESS	0.0333848	0.02332	0.0100648	0.236647	0.311297	0
TCGA	GOBP_CELLULAR_RESPONSE_TO_INTERFERON_BETA	0.301476	-0.123958	0.425433	8.50183e-25	9.07196e-23	1
TCGA	GOBP_INDOLALKYLAMINE_METABOLIC_PROCESS	0.152921	-0.0200085	0.172929	4.32994e-11	4.22586e-10	0
TCGA	GOBP_THYROID_HORMONE_GENERATION	-0.00184499	0.0787063	-0.0805513	0.0349721	0.0596984	0
TCGA	GOBP_POLYAMINE_METABOLIC_PROCESS	0.0517642	-0.0428637	0.0946279	0.0372676	0.0631919	0
TCGA	GOBP_POLYAMINE_BIOSYNTHETIC_PROCESS	0.05351	-0.0768078	0.130318	0.00328122	0.00734871	0
TCGA	GOBP_PROTEIN_TARGETING	-0.0510395	-0.0388895	-0.0121501	0.849207	0.881514	0
TCGA	GOBP_NLS_BEARING_PROTEIN_IMPORT_INTO_NUCLEUS	-0.0659205	-0.0701415	0.00422105	0.358573	0.442871	0
TCGA	GOBP_PROTEIN_TARGETING_TO_MEMBRANE	-0.0996799	-0.0139134	-0.0857664	0.626215	0.695566	0
TCGA	GOBP_COTRANSLATIONAL_PROTEIN_TARGETING_TO_MEMBRANE	-0.103496	0.00103654	-0.104533	0.694177	0.755673	0
TCGA	GOBP_POSTTRANSLATIONAL_PROTEIN_TARGETING_TO_ENDOPLASMIC_RETICULUM_MEMBRANE	0.0415492	-0.0738715	0.115421	0.00229391	0.00536727	0
TCGA	GOBP_PROTEIN_TARGETING_TO_LYSOSOME	-0.0824316	-0.0158286	-0.066603	0.493738	0.574838	0
TCGA	GOBP_PROTEIN_TARGETING_TO_VACUOLE	-0.1077	0.00021451	-0.107915	0.00749957	0.0153841	0
TCGA	GOBP_PROTEIN_TARGETING_TO_MITOCHONDRION	-0.0481494	-0.0509525	0.00280314	0.18607	0.254323	0
TCGA	GOBP_DNA_BIOSYNTHETIC_PROCESS	0.0115888	-0.0753808	0.0869696	0.00239843	0.00558607	1
TCGA	GOBP_DNA_CATABOLIC_PROCESS	0.016035	-0.049471	0.065506	0.000139617	0.000444516	1
TCGA	GOBP_DNA_DAMAGE_RESPONSE_DETECTION_OF_DNA_DAMAGE	0.105738	-0.105687	0.211425	0.000291178	0.000855663	1
TCGA	GOBP_DNA_DAMAGE_RESPONSE_SIGNAL_TRANSDUCTION_BY_P53_CLASS_MEDIATOR	0.0137692	-0.0502152	0.0639844	0.00081642	0.00212588	1
TCGA	GOBP_NEUTRAL_LIPID_METABOLIC_PROCESS	-0.0244017	0.0268775	-0.0512792	0.00201785	0.00477862	0
TCGA	GOBP_TRIGLYCERIDE_METABOLIC_PROCESS	-0.0245661	0.0434337	-0.0679999	0.0044912	0.00974052	0
TCGA	GOBP_MEMBRANE_LIPID_METABOLIC_PROCESS	-0.0477724	-0.0133349	-0.0344375	0.0623955	0.0992344	0
TCGA	GOBP_PHOSPHOLIPID_METABOLIC_PROCESS	-0.062104	-0.00556604	-0.0565379	0.000304395	0.000889353	0
TCGA	GOBP_PHOSPHATIDYLETHANOLAMINE_BIOSYNTHETIC_PROCESS	-0.0524919	0.0351723	-0.0876642	0.0375304	0.0635314	0
TCGA	GOBP_GLYCEROPHOSPHOLIPID_METABOLIC_PROCESS	-0.0550887	-0.0184941	-0.0365946	0.00842526	0.0170487	0
TCGA	GOBP_PHOSPHATIDYLGLYCEROL_BIOSYNTHETIC_PROCESS	-0.172416	0.011387	-0.183803	0.00869041	0.0175085	0
TCGA	GOBP_PHOSPHATIDYLCHOLINE_BIOSYNTHETIC_PROCESS	-0.16362	0.0075391	-0.171159	2.50125e-08	1.615e-07	0
TCGA	GOBP_PHOSPHATIDYLSERINE_METABOLIC_PROCESS	-0.0518997	0.0310358	-0.0829356	0.00298015	0.00675189	0
TCGA	GOBP_PHOSPHATIDYLINOSITOL_BIOSYNTHETIC_PROCESS	-0.0659751	-0.0179426	-0.0480325	0.0609289	0.0971455	0
TCGA	GOBP_GLYCEROL_ETHER_METABOLIC_PROCESS	-0.0199546	-0.0443002	0.0243456	0.49798	0.578451	0
TCGA	GOBP_SPHINGOLIPID_METABOLIC_PROCESS	-0.0364264	-0.0046127	-0.0318136	0.245099	0.320834	0
TCGA	GOBP_CERAMIDE_METABOLIC_PROCESS	-0.0142047	-0.00550773	-0.00869701	0.531349	0.610366	0
TCGA	GOBP_GLYCOSYLCERAMIDE_METABOLIC_PROCESS	-0.0203857	-0.0464907	0.026105	0.812606	0.852237	0
TCGA	GOBP_SPHINGOMYELIN_METABOLIC_PROCESS	-0.116358	0.0387489	-0.155107	7.58914e-06	3.16734e-05	0
TCGA	GOBP_GLYCOSPHINGOLIPID_METABOLIC_PROCESS	-0.0164718	-0.0247254	0.00825363	0.74649	0.799249	0
TCGA	GOBP_GLYCOSPHINGOLIPID_BIOSYNTHETIC_PROCESS	-0.00847368	0.0191945	-0.0276682	0.118571	0.172917	0
TCGA	GOBP_ICOSANOID_METABOLIC_PROCESS	-0.0218992	0.0533086	-0.0752078	0.0191113	0.0352435	0
TCGA	GOBP_LEUKOTRIENE_METABOLIC_PROCESS	0.0206395	0.0572316	-0.0365921	0.28704	0.367582	0
TCGA	GOBP_PROSTANOID_METABOLIC_PROCESS	-0.0499576	0.0252776	-0.0752352	0.0832289	0.127648	0
TCGA	GOBP_STEROID_BIOSYNTHETIC_PROCESS	-0.0320042	0.00259133	-0.0345956	0.000549471	0.00149842	0
TCGA	GOBP_BILE_ACID_BIOSYNTHETIC_PROCESS	-0.0314218	0.0269951	-0.0584169	0.0146058	0.0276996	0
TCGA	GOBP_C21_STEROID_HORMONE_BIOSYNTHETIC_PROCESS	-0.0506076	0.0449273	-0.0955349	0.00019271	0.000597435	0
TCGA	GOBP_ANDROGEN_BIOSYNTHETIC_PROCESS	-0.0689144	0.0668998	-0.135814	7.73322e-05	0.000259221	0
TCGA	GOBP_ESTROGEN_BIOSYNTHETIC_PROCESS	-0.05211	0.0280095	-0.0801195	0.0213259	0.03875	0
TCGA	GOBP_GLUCOCORTICOID_BIOSYNTHETIC_PROCESS	-0.0416361	0.0946144	-0.136251	3.58691e-05	0.000129471	0
TCGA	GOBP_STEROID_CATABOLIC_PROCESS	0.109991	-0.00894373	0.118935	0.000698239	0.00185333	0
TCGA	GOBP_CHOLESTEROL_CATABOLIC_PROCESS	0.165539	-0.0581463	0.223686	3.6472e-05	0.000131273	0
TCGA	GOBP_ISOPRENOID_METABOLIC_PROCESS	-0.00999083	0.0433232	-0.053314	0.0209508	0.0381368	0
TCGA	GOBP_TERPENOID_METABOLIC_PROCESS	-0.0125432	0.0573179	-0.0698611	0.00861737	0.0173751	0
TCGA	GOBP_ONE_CARBON_METABOLIC_PROCESS	-0.012244	0.000487593	-0.0127316	0.924833	0.942665	0
TCGA	GOBP_NADH_METABOLIC_PROCESS	0.0410062	-0.0337932	0.0747994	0.190573	0.259779	0
TCGA	GOBP_NADP_METABOLIC_PROCESS	-0.0346723	-0.0664	0.0317277	0.546536	0.623857	0
TCGA	GOBP_NADPH_REGENERATION	-0.0532706	-0.0516314	-0.00163926	0.738525	0.79256	0
TCGA	GOBP_UBIQUINONE_METABOLIC_PROCESS	-0.0858377	-0.0324761	-0.0533616	0.598657	0.670533	0
TCGA	GOBP_GLUTATHIONE_METABOLIC_PROCESS	-0.0489084	-0.00375285	-0.0451556	0.982806	0.986109	0
TCGA	GOBP_GLUTATHIONE_CATABOLIC_PROCESS	-0.0720703	0.0095855	-0.0816558	0.035977	0.0612079	0
TCGA	GOBP_ATP_BIOSYNTHETIC_PROCESS	-0.00246209	-0.0618744	0.0594124	0.0849477	0.129774	0
TCGA	GOBP_FOLIC_ACID_CONTAINING_COMPOUND_METABOLIC_PROCESS	0.0127598	-0.0489388	0.0616986	0.0415698	0.0696489	0
TCGA	GOBP_VITAMIN_METABOLIC_PROCESS	0.00642849	-0.00738638	0.0138149	0.161549	0.225422	0
TCGA	GOBP_WATER_SOLUBLE_VITAMIN_METABOLIC_PROCESS	-0.0462603	-0.0417543	-0.00450599	0.922551	0.940906	0
TCGA	GOBP_FAT_SOLUBLE_VITAMIN_METABOLIC_PROCESS	0.121695	0.050615	0.0710795	0.00107342	0.00270891	0
TCGA	GOBP_PORPHYRIN_CONTAINING_COMPOUND_METABOLIC_PROCESS	-0.0735054	-0.018547	-0.0549584	0.0371804	0.0630861	0
TCGA	GOBP_SULFUR_COMPOUND_METABOLIC_PROCESS	-0.0598341	-0.00809557	-0.0517385	0.0316415	0.0545635	0
TCGA	GOBP_SUPEROXIDE_METABOLIC_PROCESS	0.131982	-0.0442698	0.176252	4.556e-08	2.82316e-07	0
TCGA	GOBP_POTASSIUM_ION_TRANSPORT	-0.0169218	0.0659683	-0.0828901	3.81725e-06	1.68603e-05	0
TCGA	GOBP_SODIUM_ION_TRANSPORT	-0.0561262	0.0664576	-0.122584	1.13567e-10	1.04035e-09	0
TCGA	GOBP_CALCIUM_ION_TRANSPORT	0.0744628	-0.00131866	0.0757815	5.99863e-05	0.000205419	0
TCGA	GOBP_PHOSPHATE_ION_TRANSPORT	-0.0361124	0.0230146	-0.059127	0.0314143	0.0542087	0
TCGA	GOBP_CHLORIDE_TRANSPORT	-0.0182697	0.0499784	-0.0682481	4.03448e-06	1.76661e-05	0
TCGA	GOBP_COPPER_ION_TRANSPORT	-0.0193091	-0.0483441	0.0290351	0.0863434	0.131708	0
TCGA	GOBP_IRON_ION_TRANSPORT	-0.0131467	0.00267205	-0.0158188	0.639853	0.70808	0
TCGA	GOBP_MANGANESE_ION_TRANSPORT	-0.082578	0.0322652	-0.114843	0.00038912	0.00110385	0
TCGA	GOBP_ZINC_ION_TRANSPORT	-0.0321979	0.0315459	-0.0637439	0.00901336	0.0180445	0
TCGA	GOBP_WATER_TRANSPORT	-0.0635898	0.091004	-0.154594	0.000639659	0.00171036	0
TCGA	GOBP_DICARBOXYLIC_ACID_TRANSPORT	-0.0419621	0.0443938	-0.0863559	2.16318e-09	1.66587e-08	0
TCGA	GOBP_NEUROTRANSMITTER_TRANSPORT	0.00237383	0.0444575	-0.0420837	0.000581548	0.00157406	0
TCGA	GOBP_SEROTONIN_TRANSPORT	0.0812849	0.0550737	0.0262111	0.364115	0.448624	0
TCGA	GOBP_MITOCHONDRIAL_TRANSPORT	-0.0480661	-0.0299805	-0.0180856	0.927877	0.944251	0
TCGA	GOBP_MITOCHONDRIAL_CALCIUM_ION_TRANSMEMBRANE_TRANSPORT	-0.0523998	-0.0312397	-0.02116	0.507136	0.587741	0
TCGA	GOBP_CARNITINE_SHUTTLE	-0.225289	0.017204	-0.242492	7.4214e-08	4.47311e-07	0
TCGA	GOBP_DRUG_TRANSMEMBRANE_TRANSPORT	-0.17685	0.0649298	-0.24178	2.68646e-08	1.72361e-07	0
TCGA	GOBP_OLIGOPEPTIDE_TRANSPORT	0.00947713	-0.0309785	0.0404556	0.745765	0.798641	0
TCGA	GOBP_EXTRACELLULAR_TRANSPORT	-0.120471	-0.0426023	-0.0778683	0.148486	0.210435	0
TCGA	GOBP_NUCLEOTIDE_TRANSPORT	-0.0864207	0.0116634	-0.0980841	0.00025755	0.000767508	0
TCGA	GOBP_DNA_DEMETHYLATION	0.125889	-0.0658334	0.191722	8.43065e-11	7.90861e-10	1
TCGA	GOBP_CELLULAR_COPPER_ION_HOMEOSTASIS	0.0798568	-0.0677829	0.14764	1.15739e-05	4.68401e-05	0
TCGA	GOBP_CELLULAR_IRON_ION_HOMEOSTASIS	-0.00218953	-0.0193638	0.0171743	0.208348	0.280617	0
TCGA	GOBP_CELLULAR_SODIUM_ION_HOMEOSTASIS	-0.0712777	0.0962945	-0.167572	1.58523e-05	6.2901e-05	0
TCGA	GOBP_CELL_VOLUME_HOMEOSTASIS	-0.0250432	-0.00434768	-0.0206956	0.997325	0.997718	0
TCGA	GOBP_REGULATION_OF_PH	0.0169659	-0.0179377	0.0349036	0.202181	0.273109	0
TCGA	GOBP_ENDOPLASMIC_RETICULUM_TO_GOLGI_VESICLE_MEDIATED_TRANSPORT	-0.0721522	-0.000396966	-0.0717552	0.00694087	0.0143893	0
TCGA	GOBP_RETROGRADE_VESICLE_MEDIATED_TRANSPORT_GOLGI_TO_ENDOPLASMIC_RETICULUM	-0.0537213	-0.0217526	-0.0319687	0.393684	0.478436	0
TCGA	GOBP_INTRA_GOLGI_VESICLE_MEDIATED_TRANSPORT	-0.0750444	-0.00199593	-0.0730485	0.0192097	0.0353991	0
TCGA	GOBP_POST_GOLGI_VESICLE_MEDIATED_TRANSPORT	-0.0778115	-0.0255798	-0.0522317	0.0301535	0.0523535	0
TCGA	GOBP_GOLGI_TO_PLASMA_MEMBRANE_TRANSPORT	-0.0732622	-0.0168129	-0.0564493	0.0245427	0.0436419	0
TCGA	GOBP_GOLGI_TO_ENDOSOME_TRANSPORT	-0.118512	-0.0163349	-0.102177	0.0179185	0.0332735	0
TCGA	GOBP_GOLGI_TO_VACUOLE_TRANSPORT	-0.0774651	-0.0156403	-0.0618248	0.00852083	0.0172147	0
TCGA	GOBP_RECEPTOR_MEDIATED_ENDOCYTOSIS	0.0219369	-0.0294901	0.051427	0.0611934	0.097506	0
TCGA	GOBP_VESICLE_BUDDING_FROM_MEMBRANE	-0.066587	-0.0307455	-0.0358415	0.119024	0.173428	0
TCGA	GOBP_VESICLE_TARGETING	-0.0448936	-0.017795	-0.0270986	0.188633	0.257481	0
TCGA	GOBP_VESICLE_DOCKING_INVOLVED_IN_EXOCYTOSIS	-0.0241992	-0.0147804	-0.00941879	0.804443	0.846299	0
TCGA	GOBP_PINOCYTOSIS	0.0340744	-0.0139692	0.0480436	0.0100197	0.0198245	0
TCGA	GOBP_PHAGOCYTOSIS	0.151812	-0.0712094	0.223022	1.48158e-09	1.17119e-08	0
TCGA	GOBP_PHAGOCYTOSIS_RECOGNITION	0.0846936	0.0162798	0.0684138	0.107684	0.159097	0
TCGA	GOBP_ACTIVATION_OF_CYSTEINE_TYPE_ENDOPEPTIDASE_ACTIVITY_INVOLVED_IN_APOPTOTIC_PROCESS	0.119189	-0.0501661	0.169355	4.88446e-15	7.62728e-14	0
TCGA	GOBP_CELLULAR_COMPONENT_DISASSEMBLY_INVOLVED_IN_EXECUTION_PHASE_OF_APOPTOSIS	0.0448607	-0.0378524	0.0827131	0.0037677	0.008328	0
TCGA	GOBP_INFLAMMATORY_CELL_APOPTOTIC_PROCESS	0.189053	-0.0691185	0.258172	1.02912e-15	1.78863e-14	0
TCGA	GOBP_SUBSTRATE_DEPENDENT_CELL_MIGRATION	0.0085263	-0.0304086	0.0389349	0.359074	0.443275	0
TCGA	GOBP_MUSCLE_CONTRACTION	-0.0342472	0.0268679	-0.0611152	0.0295038	0.0514543	0
TCGA	GOBP_REGULATION_OF_MUSCLE_CONTRACTION	-0.00393152	0.032259	-0.0361905	0.0442263	0.0735655	0
TCGA	GOBP_SMOOTH_MUSCLE_CONTRACTION	0.0199761	0.046324	-0.0263479	0.127409	0.18385	0
TCGA	GOBP_REGULATION_OF_SMOOTH_MUSCLE_CONTRACTION	-0.0259477	0.0561326	-0.0820803	0.0254726	0.0451532	0
TCGA	GOBP_STRIATED_MUSCLE_CONTRACTION	-0.0256949	0.0318242	-0.0575192	0.000407924	0.00114948	0
TCGA	GOBP_REGULATION_OF_STRIATED_MUSCLE_CONTRACTION	-0.0148102	0.0288183	-0.0436285	0.0163583	0.0306002	0
TCGA	GOBP_SYNCYTIUM_FORMATION	0.0642686	0.00611298	0.0581556	0.0921123	0.139128	0
TCGA	GOBP_ACUTE_PHASE_RESPONSE	0.135662	0.0296305	0.106031	0.000526504	0.00144433	0
TCGA	GOBP_COMPLEMENT_ACTIVATION	0.151597	0.005671	0.145926	2.95827e-05	0.00010887	0
TCGA	GOBP_COMPLEMENT_ACTIVATION_ALTERNATIVE_PATHWAY	0.195185	0.011648	0.183537	0.000865708	0.00223814	0
TCGA	GOBP_HUMORAL_IMMUNE_RESPONSE	0.184059	0.00589681	0.178162	6.12465e-13	7.34814e-12	0
TCGA	GOBP_CELLULAR_DEFENSE_RESPONSE	0.30902	-0.113246	0.422266	5.9514e-18	1.36667e-16	0
TCGA	GOBP_RESPONSE_TO_OSMOTIC_STRESS	-0.00934698	-0.00122388	-0.0081231	0.414181	0.499636	0
TCGA	GOBP_HYPOTONIC_RESPONSE	-0.0316044	-0.044875	0.0132705	0.798519	0.842337	0
TCGA	GOBP_HYPEROSMOTIC_RESPONSE	-0.051386	0.0430507	-0.0944367	0.00172132	0.00413817	0
TCGA	GOBP_RESPONSE_TO_OXIDATIVE_STRESS	0.00417823	-0.0300744	0.0342526	0.0128815	0.0247816	0
TCGA	GOBP_ER_OVERLOAD_RESPONSE	-0.101608	-0.00843792	-0.0931699	0.0205815	0.0375588	0
TCGA	GOBP_ER_NUCLEUS_SIGNALING_PATHWAY	-0.00991271	-0.0321535	0.0222408	0.761041	0.811404	0
TCGA	GOBP_RESPONSE_TO_STEROL_DEPLETION	-0.0563658	-0.0243857	-0.0319801	0.648784	0.716557	0
TCGA	GOBP_CELLULAR_RESPONSE_TO_NITROGEN_STARVATION	-0.0019397	-0.0441085	0.0421688	0.0569487	0.0915763	0
TCGA	GOBP_NUCLEUS_ORGANIZATION	-0.0187172	-0.0451468	0.0264296	0.0266943	0.0470394	0
TCGA	GOBP_NUCLEAR_ENVELOPE_ORGANIZATION	0.0339461	-0.0717702	0.105716	0.000579493	0.00157017	0
TCGA	GOBP_NUCLEAR_PORE_ORGANIZATION	-0.044273	-0.14177	0.0974974	0.385241	0.469749	0
TCGA	GOBP_MITOCHONDRIAL_MEMBRANE_ORGANIZATION	-0.0482075	-0.0515855	0.00337801	0.661928	0.72759	0
TCGA	GOBP_INNER_MITOCHONDRIAL_MEMBRANE_ORGANIZATION	-0.0545736	-0.0727482	0.0181746	0.433608	0.5179	0
TCGA	GOBP_PLASMA_MEMBRANE_ORGANIZATION	-0.00465886	0.00879421	-0.0134531	0.769081	0.817914	0
TCGA	GOBP_ACTIN_FILAMENT_ORGANIZATION	0.00134574	-0.0169278	0.0182735	0.285309	0.365735	0
TCGA	GOBP_MICROTUBULE_BASED_MOVEMENT	-0.0618103	-0.0221074	-0.0397029	0.0368331	0.0625596	0
TCGA	GOBP_MICROTUBULE_DEPOLYMERIZATION	-0.012904	-0.00349592	-0.00940813	0.167069	0.232295	0
TCGA	GOBP_MICROTUBULE_NUCLEATION	-0.122447	0.0104291	-0.132876	2.92114e-05	0.00010766	0
TCGA	GOBP_CYTOPLASM_ORGANIZATION	-0.0198419	0.0482616	-0.0681035	0.0277619	0.0487009	0
TCGA	GOBP_ENDOPLASMIC_RETICULUM_ORGANIZATION	-0.0780014	-0.0122341	-0.0657672	0.008863	0.0177856	0
TCGA	GOBP_GOLGI_ORGANIZATION	-0.096697	-0.0001984	-0.0964986	7.83097e-06	3.26023e-05	0
TCGA	GOBP_PEROXISOME_ORGANIZATION	-0.0633992	-0.0228068	-0.0405925	0.482918	0.565224	0
TCGA	GOBP_ENDOSOME_ORGANIZATION	-0.10052	-0.032147	-0.068373	0.0483153	0.07943	0
TCGA	GOBP_VACUOLE_ORGANIZATION	-0.0153254	-0.026609	0.0112836	0.295801	0.377278	0
TCGA	GOBP_VACUOLAR_TRANSPORT	-0.107426	-0.0174576	-0.089968	0.000751259	0.00197546	0
TCGA	GOBP_VACUOLAR_ACIDIFICATION	-0.0244286	-0.0581806	0.033752	0.548449	0.625619	0
TCGA	GOBP_PROTEIN_CATABOLIC_PROCESS_IN_THE_VACUOLE	-0.0646124	-0.00131763	-0.0632948	0.061326	0.0976253	0
TCGA	GOBP_LYSOSOMAL_TRANSPORT	-0.0685395	-0.00344479	-0.0650947	0.00110661	0.00278711	0
TCGA	GOBP_LYSOSOMAL_LUMEN_ACIDIFICATION	-0.087554	-0.0981167	0.0105627	0.828247	0.864888	0
TCGA	GOBP_CELL_CELL_JUNCTION_ASSEMBLY	-0.0753598	0.0428747	-0.118234	8.20303e-07	4.07741e-06	0
TCGA	GOBP_CELL_CYCLE_ARREST	0.00407089	-0.0334055	0.0374764	0.0109435	0.021435	0
TCGA	GOBP_SPINDLE_ORGANIZATION	0.0109332	-0.0977025	0.108636	0.011781	0.022855	0
TCGA	GOBP_MITOTIC_SPINDLE_ORGANIZATION	0.0288662	-0.0798916	0.108758	0.02929	0.0511164	0
TCGA	GOBP_CHROMOSOME_SEGREGATION	0.0761642	-0.114452	0.190616	0.00147995	0.00362137	0
TCGA	GOBP_SISTER_CHROMATID_COHESION	0.0135244	-0.114715	0.12824	0.0877575	0.133464	0
TCGA	GOBP_REGULATION_OF_SISTER_CHROMATID_COHESION	-0.048654	-0.0749716	0.0263176	0.428004	0.512898	0
TCGA	GOBP_MITOTIC_SISTER_CHROMATID_COHESION	0.016175	-0.107157	0.123332	0.061326	0.0976253	0
TCGA	GOBP_MITOTIC_CHROMOSOME_CONDENSATION	0.0529632	-0.125509	0.178472	0.00191623	0.00456351	0
TCGA	GOBP_MITOTIC_NUCLEAR_ENVELOPE_DISASSEMBLY	0.213616	-0.150311	0.363927	1.62563e-10	1.46019e-09	0
TCGA	GOBP_MITOTIC_METAPHASE_PLATE_CONGRESSION	0.122847	-0.089425	0.212272	0.000883752	0.00227667	0
TCGA	GOBP_REGULATION_OF_MITOTIC_NUCLEAR_DIVISION	0.0953118	-0.0810342	0.176346	0.000123769	0.000399827	0
TCGA	GOBP_MITOTIC_CELL_CYCLE_CHECKPOINT	0.0627206	-0.0636489	0.126369	0.000488451	0.00135163	0
TCGA	GOBP_DNA_DEPENDENT_DNA_REPLICATION	0.147386	-0.134134	0.281521	6.40044e-05	0.000217855	1
TCGA	GOBP_REGULATION_OF_EXIT_FROM_MITOSIS	0.103234	-0.0857047	0.188938	2.39493e-06	1.10393e-05	0
TCGA	GOBP_NUCLEAR_MIGRATION	-0.0313746	0.0150213	-0.046396	0.013056	0.0250507	0
TCGA	GOBP_HOMOLOGOUS_CHROMOSOME_PAIRING_AT_MEIOSIS	0.0659343	-0.0226213	0.0885556	0.0317175	0.054676	0
TCGA	GOBP_MALE_MEIOTIC_NUCLEAR_DIVISION	0.113379	-0.0172093	0.130589	0.000653286	0.00174221	0
TCGA	GOBP_MALE_MEIOSIS_I	0.140335	-0.0176897	0.158025	1.2973e-05	5.2087e-05	0
TCGA	GOBP_FEMALE_MEIOTIC_NUCLEAR_DIVISION	0.0363018	-0.0580202	0.0943219	0.0464955	0.0768113	0
TCGA	GOBP_HOMOPHILIC_CELL_ADHESION_VIA_PLASMA_MEMBRANE_ADHESION_MOLECULES	-0.0940731	0.0877557	-0.181829	3.07237e-05	0.00011258	0
TCGA	GOBP_HETEROPHILIC_CELL_CELL_ADHESION_VIA_PLASMA_MEMBRANE_CELL_ADHESION_MOLECULES	0.0465392	0.0362411	0.0102981	0.371246	0.45564	0
TCGA	GOBP_NEURON_CELL_CELL_ADHESION	-0.065324	0.0918425	-0.157167	9.28862e-05	0.000307099	0
TCGA	GOBP_LEUKOCYTE_CELL_CELL_ADHESION	0.228171	-0.102665	0.330836	2.3752e-18	5.93801e-17	0
TCGA	GOBP_CELL_MATRIX_ADHESION	-0.0407571	-0.00698754	-0.0337696	0.223994	0.298052	0
TCGA	GOBP_NEGATIVE_REGULATION_OF_CELL_ADHESION	0.106654	-0.0442222	0.150876	1.21089e-06	5.84152e-06	0
TCGA	GOBP_ESTABLISHMENT_OR_MAINTENANCE_OF_CELL_POLARITY	-0.0283329	-0.019956	-0.00837689	0.254957	0.331856	0
TCGA	GOBP_ESTABLISHMENT_OF_TISSUE_POLARITY	0.074086	-0.0567071	0.130793	5.5525e-05	0.000191433	0
TCGA	GOBP_RECEPTOR_GUANYLYL_CYCLASE_SIGNALING_PATHWAY	0.00092393	0.0616949	-0.060771	0.0731911	0.113835	0
TCGA	GOBP_ACTIVATION_OF_TRANSMEMBRANE_RECEPTOR_PROTEIN_TYROSINE_KINASE_ACTIVITY	-0.0527213	0.051561	-0.104282	0.0316415	0.0545635	0
TCGA	GOBP_EPIDERMAL_GROWTH_FACTOR_RECEPTOR_SIGNALING_PATHWAY	-0.0157531	0.00837372	-0.0241268	0.819301	0.857663	0
TCGA	GOBP_NEGATIVE_REGULATION_OF_EPIDERMAL_GROWTH_FACTOR_ACTIVATED_RECEPTOR_ACTIVITY	-0.014569	-0.0287393	0.0141702	0.858975	0.888927	0
TCGA	GOBP_REGULATION_OF_EPIDERMAL_GROWTH_FACTOR_ACTIVATED_RECEPTOR_ACTIVITY	0.0317038	-0.0208439	0.0525477	0.178224	0.245318	0
TCGA	GOBP_TRANSMEMBRANE_RECEPTOR_PROTEIN_SERINE_THREONINE_KINASE_SIGNALING_PATHWAY	-0.0810224	0.0330537	-0.114076	4.43557e-07	2.33028e-06	0
TCGA	GOBP_TRANSFORMING_GROWTH_FACTOR_BETA_RECEPTOR_SIGNALING_PATHWAY	-0.0916538	0.023331	-0.114985	3.66242e-05	0.000131728	0
TCGA	GOBP_SMAD_PROTEIN_COMPLEX_ASSEMBLY	-0.137002	0.0340804	-0.171082	0.00092722	0.00238019	0
TCGA	GOBP_G_PROTEIN_COUPLED_RECEPTOR_SIGNALING_PATHWAY_COUPLED_TO_CYCLIC_NUCLEOTIDE_SECOND_MESSENGER	0.101293	0.0959035	0.00538967	0.949212	0.961335	0
TCGA	GOBP_ADENYLATE_CYCLASE_MODULATING_G_PROTEIN_COUPLED_RECEPTOR_SIGNALING_PATHWAY	0.0274512	0.045827	-0.0183757	0.664013	0.72925	0
TCGA	GOBP_ADENYLATE_CYCLASE_ACTIVATING_G_PROTEIN_COUPLED_RECEPTOR_SIGNALING_PATHWAY	0.0382186	0.0500159	-0.0117973	0.884622	0.910271	0
TCGA	GOBP_ACTIVATION_OF_ADENYLATE_CYCLASE_ACTIVITY	-0.0365247	0.0956461	-0.132171	0.000426033	0.00119586	0
TCGA	GOBP_ADENYLATE_CYCLASE_ACTIVATING_DOPAMINE_RECEPTOR_SIGNALING_PATHWAY	0.0505099	0.0428153	0.00769468	0.407641	0.493507	0
TCGA	GOBP_ADENYLATE_CYCLASE_INHIBITING_G_PROTEIN_COUPLED_RECEPTOR_SIGNALING_PATHWAY	0.0368788	0.0327145	0.0041643	0.542719	0.620477	0
TCGA	GOBP_NEGATIVE_REGULATION_OF_ADENYLATE_CYCLASE_ACTIVITY	0.121196	-0.00248616	0.123682	8.37652e-05	0.000279309	0
TCGA	GOBP_PHOSPHOLIPASE_C_ACTIVATING_G_PROTEIN_COUPLED_RECEPTOR_SIGNALING_PATHWAY	0.103959	0.0308016	0.0731578	0.132755	0.190534	0
TCGA	GOBP_ACTIVATION_OF_PHOSPHOLIPASE_C_ACTIVITY	0.0933766	-0.0155033	0.10888	0.000902145	0.0023217	0
TCGA	GOBP_PROTEIN_KINASE_C_ACTIVATING_G_PROTEIN_COUPLED_RECEPTOR_SIGNALING_PATHWAY	0.0442498	0.0060214	0.0382284	0.462254	0.546075	0
TCGA	GOBP_SEROTONIN_RECEPTOR_SIGNALING_PATHWAY	0.116315	0.133122	-0.0168061	0.395812	0.480677	0
TCGA	GOBP_DOPAMINE_RECEPTOR_SIGNALING_PATHWAY	0.00848494	0.0168536	-0.0083687	0.554209	0.630206	0
TCGA	GOBP_G_PROTEIN_COUPLED_ACETYLCHOLINE_RECEPTOR_SIGNALING_PATHWAY	0.0364406	0.0107767	0.0256639	0.719812	0.777078	0
TCGA	GOBP_GAMMA_AMINOBUTYRIC_ACID_SIGNALING_PATHWAY	0.0768896	0.0754037	0.00148593	0.704107	0.764187	0
TCGA	GOBP_GLUTAMATE_RECEPTOR_SIGNALING_PATHWAY	-0.0112817	0.067922	-0.0792037	0.000213464	0.000652216	0
TCGA	GOBP_G_PROTEIN_COUPLED_GLUTAMATE_RECEPTOR_SIGNALING_PATHWAY	0.008235	0.0558275	-0.0475925	0.112373	0.164967	0
TCGA	GOBP_NEUROPEPTIDE_SIGNALING_PATHWAY	0.0479274	0.0860352	-0.0381079	0.00840152	0.017021	0
TCGA	GOBP_NOTCH_SIGNALING_PATHWAY	-0.0865233	0.0344679	-0.120991	2.54664e-10	2.23216e-09	0
TCGA	GOBP_NOTCH_RECEPTOR_PROCESSING	-0.0041392	-0.0381482	0.034009	0.736358	0.79107	0
TCGA	GOBP_POSITIVE_REGULATION_OF_TRANSCRIPTION_OF_NOTCH_RECEPTOR_TARGET	-0.0905471	0.0135548	-0.104102	0.0218718	0.0395861	0
TCGA	GOBP_WNT_SIGNALING_PATHWAY_CALCIUM_MODULATING_PATHWAY	-0.0239532	0.0211527	-0.0451059	0.0469184	0.0774092	0
TCGA	GOBP_SMOOTHENED_SIGNALING_PATHWAY	-0.106381	0.00674047	-0.113121	1.78249e-07	1.00401e-06	0
TCGA	GOBP_INTEGRIN_MEDIATED_SIGNALING_PATHWAY	0.0696284	-0.0386061	0.108235	0.00188545	0.00450289	0
TCGA	GOBP_I_KAPPAB_KINASE_NF_KAPPAB_SIGNALING	0.0874958	-0.039709	0.127205	1.04897e-12	1.22945e-11	0
TCGA	GOBP_ACTIVATION_OF_NF_KAPPAB_INDUCING_KINASE_ACTIVITY	0.00655068	-0.0311249	0.0376756	0.329283	0.411705	0
TCGA	GOBP_I_KAPPAB_PHOSPHORYLATION	0.0834181	-0.0297792	0.113197	0.0133037	0.0254875	0
TCGA	GOBP_JNK_CASCADE	0.0402717	-0.0179909	0.0582626	0.00475426	0.0102628	0
TCGA	GOBP_ACTIVATION_OF_JNKK_ACTIVITY	0.0930688	-0.0496744	0.142743	0.00425422	0.00927413	0
TCGA	GOBP_ACTIVATION_OF_JUN_KINASE_ACTIVITY	0.0475545	-0.0199954	0.0675499	0.0553452	0.0895368	0
TCGA	GOBP_TYROSINE_PHOSPHORYLATION_OF_STAT_PROTEIN	0.190022	-0.054448	0.24447	1.32056e-18	3.4193e-17	0
TCGA	GOBP_NITRIC_OXIDE_MEDIATED_SIGNAL_TRANSDUCTION	-0.0191497	0.0833243	-0.102474	0.000215082	0.00065637	0
TCGA	GOBP_SMALL_GTPASE_MEDIATED_SIGNAL_TRANSDUCTION	0.00306195	-0.0307576	0.0338196	0.557421	0.633008	0
TCGA	GOBP_RAS_PROTEIN_SIGNAL_TRANSDUCTION	-0.00363127	-0.0241321	0.0205008	0.27676	0.356035	0
TCGA	GOBP_RHO_PROTEIN_SIGNAL_TRANSDUCTION	-0.0235162	-0.000419764	-0.0230964	0.525085	0.605226	0
TCGA	GOBP_NEUROTRANSMITTER_SECRETION	-0.0184567	0.0337513	-0.052208	0.000443289	0.00124018	0
TCGA	GOBP_SYNAPTIC_TRANSMISSION_CHOLINERGIC	0.0223349	0.0176265	0.00470841	0.565816	0.64082	0
TCGA	GOBP_ENSHEATHMENT_OF_NEURONS	-0.0189945	-0.00274349	-0.016251	0.255758	0.332642	0
TCGA	GOBP_NEUROMUSCULAR_SYNAPTIC_TRANSMISSION	-0.0375069	0.0566432	-0.0941501	0.000626297	0.00167729	0
TCGA	GOBP_GERM_CELL_DEVELOPMENT	0.00608109	0.0268076	-0.0207265	0.0200638	0.0366932	0
TCGA	GOBP_SPERM_AXONEME_ASSEMBLY	-0.0978076	-0.042092	-0.0557155	0.683597	0.746718	0
TCGA	GOBP_SPERMATID_NUCLEUS_DIFFERENTIATION	-0.00551706	-0.0190587	0.0135417	0.584759	0.658308	0
TCGA	GOBP_FEMALE_GAMETE_GENERATION	0.00594044	0.0183125	-0.012372	0.718379	0.776357	0
TCGA	GOBP_INSEMINATION	0.0997205	0.0811126	0.0186079	0.614722	0.685652	0
TCGA	GOBP_SINGLE_FERTILIZATION	-0.00598645	0.0500475	-0.0560339	0.000172538	0.00053918	0
TCGA	GOBP_BINDING_OF_SPERM_TO_ZONA_PELLUCIDA	0.0454063	0.031863	0.0135433	0.786707	0.832125	0
TCGA	GOBP_ACROSOME_REACTION	-0.0365902	0.061611	-0.0982012	5.18539e-08	3.19367e-07	0
TCGA	GOBP_FUSION_OF_SPERM_TO_EGG_PLASMA_MEMBRANE_INVOLVED_IN_SINGLE_FERTILIZATION	0.00858155	0.0950809	-0.0864994	0.0160189	0.0300984	0
TCGA	GOBP_BLASTODERM_SEGMENTATION	0.0458137	0.0191964	0.0266173	0.963711	0.97156	0
TCGA	GOBP_TRIPARTITE_REGIONAL_SUBDIVISION	0.0396882	0.0489314	-0.0092432	0.534495	0.613286	0
TCGA	GOBP_GASTRULATION	-0.059099	0.0175641	-0.0766631	0.00311285	0.00700874	0
TCGA	GOBP_SEGMENT_SPECIFICATION	-0.0379139	0.0443799	-0.0822938	0.00908939	0.0181609	0
TCGA	GOBP_PATTERN_SPECIFICATION_PROCESS	-0.0679982	0.0632903	-0.131288	3.11167e-12	3.44047e-11	0
TCGA	GOBP_ECTODERM_DEVELOPMENT	-0.113011	0.047615	-0.160626	1.06709e-09	8.56882e-09	0
TCGA	GOBP_NEUROBLAST_PROLIFERATION	-0.0532445	0.0549804	-0.108225	6.80415e-07	3.43935e-06	0
TCGA	GOBP_AXONAL_FASCICULATION	-0.0865816	0.0379295	-0.124511	0.000367757	0.00105207	0
TCGA	GOBP_SYNAPSE_ASSEMBLY	-0.0633978	0.0576547	-0.121053	3.70807e-08	2.32902e-07	0
TCGA	GOBP_PERIPHERAL_NERVOUS_SYSTEM_DEVELOPMENT	-0.0627024	0.0351348	-0.0978372	7.42079e-06	3.10474e-05	0
TCGA	GOBP_SALIVARY_GLAND_DEVELOPMENT	-0.0568797	0.025979	-0.0828587	0.00529124	0.011297	0
TCGA	GOBP_ENDODERM_DEVELOPMENT	-0.0496105	0.00994504	-0.0595555	0.100744	0.150111	0
TCGA	GOBP_MIDGUT_DEVELOPMENT	-0.0705661	0.107694	-0.17826	3.85266e-06	1.69872e-05	0
TCGA	GOBP_MESODERM_DEVELOPMENT	-0.0199391	0.0291049	-0.0490441	0.0109735	0.021469	0
TCGA	GOBP_MESODERMAL_CELL_FATE_SPECIFICATION	-0.056012	0.0812235	-0.137235	0.000490203	0.00135574	0
TCGA	GOBP_ADULT_HEART_DEVELOPMENT	-0.00791012	0.0867976	-0.0947077	0.00426708	0.00929817	0
TCGA	GOBP_MUSCLE_ORGAN_DEVELOPMENT	-0.0400507	0.00726482	-0.0473155	0.0109135	0.0213846	0
TCGA	GOBP_MYOBLAST_FUSION	0.0605822	0.00945144	0.0511308	0.0964469	0.14477	0
TCGA	GOBP_NEUROMUSCULAR_JUNCTION_DEVELOPMENT	-0.13512	0.0416841	-0.176804	2.11444e-13	2.70297e-12	0
TCGA	GOBP_SEX_DETERMINATION	-0.0430507	0.0828529	-0.125904	2.59409e-07	1.42479e-06	0
TCGA	GOBP_SEX_DIFFERENTIATION	-0.0177456	0.0314684	-0.049214	2.5953e-05	9.69894e-05	0
TCGA	GOBP_DOSAGE_COMPENSATION	-0.0179507	-0.0208531	0.00290244	0.487111	0.569212	0
TCGA	GOBP_EMBRYO_IMPLANTATION	0.020757	0.0041824	0.0165746	0.433608	0.5179	0
TCGA	GOBP_PARTURITION	0.0482571	0.0406554	0.00760174	0.321275	0.403781	0
TCGA	GOBP_AGING	0.0308552	-0.0213371	0.0521923	0.00215182	0.00506987	0
TCGA	GOBP_CELL_AGING	0.00989603	-0.0408344	0.0507305	0.00126588	0.00313687	0
TCGA	GOBP_RESPONSE_TO_NUTRIENT	0.0457305	0.00118201	0.0445485	0.00382562	0.00843765	0
TCGA	GOBP_RESPIRATORY_GASEOUS_EXCHANGE_BY_RESPIRATORY_SYSTEM	-0.0508518	0.016106	-0.0669578	0.0166604	0.031108	0
TCGA	GOBP_DIGESTION	0.0115116	0.0649879	-0.0534763	0.0228279	0.0409658	0
TCGA	GOBP_EXCRETION	-0.033193	0.0919125	-0.125105	1.71907e-07	9.72604e-07	0
TCGA	GOBP_BODY_FLUID_SECRETION	-0.00306678	0.0295938	-0.0326606	0.00207049	0.00489188	0
TCGA	GOBP_LACTATION	-0.014738	0.0263932	-0.0411312	0.00162818	0.00393853	0
TCGA	GOBP_BLOOD_COAGULATION_INTRINSIC_PATHWAY	0.0855707	-0.0079761	0.0935468	0.0759977	0.117839	0
TCGA	GOBP_PHOTOTRANSDUCTION	-0.0233621	0.0301974	-0.0535596	0.00696088	0.0144131	0
TCGA	GOBP_PHOTOTRANSDUCTION_VISIBLE_LIGHT	-0.0175402	0.00929496	-0.0268351	0.0577017	0.0925818	0
TCGA	GOBP_SENSORY_PERCEPTION_OF_CHEMICAL_STIMULUS	0.0980196	0.160176	-0.062156	0.0245427	0.0436419	0
TCGA	GOBP_SENSORY_PERCEPTION_OF_SMELL	0.121407	0.162325	-0.0409175	0.0274244	0.0482088	0
TCGA	GOBP_LEARNING	-0.0445675	0.034287	-0.0788546	3.32213e-06	1.4907e-05	0
TCGA	GOBP_MEMORY	-0.0364615	0.0546259	-0.0910874	6.63816e-07	3.37562e-06	0
TCGA	GOBP_LONG_TERM_MEMORY	-0.0689703	0.0439923	-0.112963	0.00181342	0.00434314	0
TCGA	GOBP_MATING_BEHAVIOR	-0.155001	0.0839894	-0.23899	1.86867e-14	2.7409e-13	0
TCGA	GOBP_MATING	-0.052956	0.0598802	-0.112836	4.4844e-06	1.9535e-05	0
TCGA	GOBP_COPULATION	0.105995	0.0492416	0.0567537	0.452397	0.537056	0
TCGA	GOBP_RHYTHMIC_BEHAVIOR	0.00359674	0.0284435	-0.0248467	0.349619	0.433076	0
TCGA	GOBP_CIRCADIAN_RHYTHM	-0.0390884	0.0211197	-0.0602082	2.777e-05	0.000103021	0
TCGA	GOBP_GROOMING_BEHAVIOR	0.0604919	0.0506834	0.00980844	0.779349	0.826582	0
TCGA	GOBP_LOCOMOTORY_BEHAVIOR	-0.0263218	0.0463016	-0.0726234	6.25557e-07	3.20353e-06	0
TCGA	GOBP_FEEDING_BEHAVIOR	0.00483421	0.0842023	-0.0793681	8.80667e-07	4.36463e-06	0
TCGA	GOBP_VISUAL_BEHAVIOR	-0.0460104	0.0398134	-0.0858238	1.53362e-07	8.75493e-07	0
TCGA	GOBP_CHEMOSENSORY_BEHAVIOR	0.0138909	0.0388625	-0.0249717	0.50591	0.586856	0
TCGA	GOBP_MECHANOSENSORY_BEHAVIOR	0.105887	0.0491951	0.0566921	0.171827	0.237867	0
TCGA	GOBP_REGULATION_OF_HEART_CONTRACTION	-0.0339515	0.0426243	-0.0765758	9.32551e-05	0.000308118	0
TCGA	GOBP_TRNA_PROCESSING	-0.0296039	-0.0791282	0.0495243	0.110222	0.162279	0
TCGA	GOBP_CELL_RECOGNITION	0.0765876	0.00248291	0.0741047	0.00178998	0.00429104	0
TCGA	GOBP_NEURON_RECOGNITION	-0.0626526	0.0289426	-0.0915951	0.00732997	0.015085	0
TCGA	GOBP_MOTOR_NEURON_AXON_GUIDANCE	0.0721849	0.0300795	0.0421054	0.256158	0.332993	0
TCGA	GOBP_MITOCHONDRIAL_FUSION	-0.0638861	-0.0720593	0.00817314	0.903559	0.925815	0
TCGA	GOBP_AXO_DENDRITIC_TRANSPORT	-0.113031	0.0145533	-0.127585	6.0423e-07	3.10686e-06	0
TCGA	GOBP_ANTEROGRADE_AXONAL_TRANSPORT	-0.0816763	0.00830069	-0.0899769	2.5734e-05	9.62419e-05	0
TCGA	GOBP_RETROGRADE_AXONAL_TRANSPORT	-0.158452	0.0554193	-0.213872	1.4939e-08	1.00285e-07	0
TCGA	GOBP_ACTIN_POLYMERIZATION_OR_DEPOLYMERIZATION	0.0378254	-0.035244	0.0730695	0.000116268	0.000377278	0
TCGA	GOBP_DNA_DOUBLE_STRAND_BREAK_PROCESSING	0.00250871	-0.0780671	0.0805758	0.0261094	0.0461049	1
TCGA	GOBP_STEROID_METABOLIC_PROCESS	-0.0359321	0.0226727	-0.0586048	4.21733e-05	0.000149462	0
TCGA	GOBP_BILE_ACID_METABOLIC_PROCESS	-0.0463468	0.0337258	-0.0800727	0.0110037	0.0215197	0
TCGA	GOBP_C21_STEROID_HORMONE_METABOLIC_PROCESS	-0.0193641	0.0525754	-0.0719395	0.0186261	0.0343987	0
TCGA	GOBP_ANDROGEN_METABOLIC_PROCESS	-0.0781286	0.0377337	-0.115862	9.437e-05	0.000311397	0
TCGA	GOBP_ESTROGEN_METABOLIC_PROCESS	0.0119303	0.0616201	-0.0496898	0.0284478	0.0497664	0
TCGA	GOBP_GLUCOCORTICOID_METABOLIC_PROCESS	-0.0393625	0.0970097	-0.136372	0.000190524	0.000591745	0
TCGA	GOBP_MINERALOCORTICOID_METABOLIC_PROCESS	-0.0786209	0.114625	-0.193246	2.15048e-09	1.66114e-08	0
TCGA	GOBP_REGULATION_OF_BLOOD_PRESSURE	-0.0200031	0.0263084	-0.0463115	0.169436	0.234941	0
TCGA	GOBP_OPSONIZATION	0.0698577	0.063604	0.0062537	0.799999	0.843373	0
TCGA	GOBP_SULFATE_TRANSPORT	-0.0597439	0.0496377	-0.109382	0.00254726	0.00588408	0
TCGA	GOBP_REGULATION_OF_G_PROTEIN_COUPLED_RECEPTOR_SIGNALING_PATHWAY	0.0529106	0.0178683	0.0350423	0.0571988	0.091862	0
TCGA	GOBP_INSULIN_RECEPTOR_SIGNALING_PATHWAY	-0.0568927	-0.0107683	-0.0461244	0.00869041	0.0175085	0
TCGA	GOBP_INTRACELLULAR_MRNA_LOCALIZATION	0.0152877	-0.0545333	0.0698211	0.127648	0.184038	0
TCGA	GOBP_ISOPRENOID_BIOSYNTHETIC_PROCESS	-0.0367886	-0.00459676	-0.0321918	0.403316	0.489087	0
TCGA	GOBP_ISOPRENOID_CATABOLIC_PROCESS	0.0292808	0.0440022	-0.0147214	0.657765	0.723799	0
TCGA	GOBP_ASSOCIATIVE_LEARNING	-0.0486004	0.0388831	-0.0874836	2.02799e-07	1.13724e-06	0
TCGA	GOBP_ENDOSOME_TO_LYSOSOME_TRANSPORT	-0.0878554	-0.0113349	-0.0765204	0.000615361	0.00165323	0
TCGA	GOBP_HISTONE_MRNA_METABOLIC_PROCESS	0.118824	-0.138276	0.257101	9.17878e-05	0.000303666	0
TCGA	GOBP_DETERMINATION_OF_ADULT_LIFESPAN	-0.0212766	-0.0227164	0.00143984	0.667493	0.732122	0
TCGA	GOBP_ADULT_FEEDING_BEHAVIOR	0.0581473	0.0607407	-0.00259348	0.556778	0.632419	0
TCGA	GOBP_ADULT_LOCOMOTORY_BEHAVIOR	-0.0514311	0.0404514	-0.0918826	2.84872e-06	1.30128e-05	0
TCGA	GOBP_GLIAL_CELL_MIGRATION	0.00747408	-0.024386	0.0318601	0.15955	0.223124	0
TCGA	GOBP_ASYMMETRIC_CELL_DIVISION	-0.0604587	-0.00845556	-0.0520031	0.096639	0.145016	0
TCGA	GOBP_REGULATION_OF_CELL_SHAPE	0.0172376	-0.0369995	0.0542371	0.122001	0.176952	0
TCGA	GOBP_REGULATION_OF_CELL_SIZE	0.0151894	-0.00573197	0.0209214	0.181332	0.248989	0
TCGA	GOBP_RNA_SPLICING	-0.028667	-0.061236	0.032569	0.323617	0.406021	0
TCGA	GOBP_RESPIRATORY_CHAIN_COMPLEX_IV_ASSEMBLY	-0.049911	-0.0701596	0.0202485	0.47341	0.556276	0
TCGA	GOBP_FIBROBLAST_GROWTH_FACTOR_RECEPTOR_SIGNALING_PATHWAY	-0.0786755	0.0279944	-0.10667	1.44507e-13	1.89013e-12	0
TCGA	GOBP_EPIDERMIS_DEVELOPMENT	0.0040483	0.0530698	-0.0490215	0.000579493	0.00157017	0
TCGA	GOBP_REGULATION_OF_SMOOTHENED_SIGNALING_PATHWAY	-0.1305	0.0295016	-0.160002	2.24088e-09	1.71531e-08	0
TCGA	GOBP_REGULATION_OF_NOTCH_SIGNALING_PATHWAY	-0.092754	0.0429237	-0.135678	3.46953e-12	3.78664e-11	0
TCGA	GOBP_ATTACHMENT_OF_SPINDLE_MICROTUBULES_TO_KINETOCHORE	0.152947	-0.141008	0.293955	0.000162276	0.000510888	0
TCGA	GOBP_EXTRINSIC_APOPTOTIC_SIGNALING_PATHWAY_VIA_DEATH_DOMAIN_RECEPTORS	0.082717	-0.0324702	0.115187	9.58395e-09	6.6085e-08	0
TCGA	GOBP_INTRINSIC_APOPTOTIC_SIGNALING_PATHWAY_IN_RESPONSE_TO_DNA_DAMAGE	0.0257245	-0.0565959	0.0823204	1.97543e-05	7.64707e-05	0
TCGA	GOBP_INTRINSIC_APOPTOTIC_SIGNALING_PATHWAY_IN_RESPONSE_TO_OXIDATIVE_STRESS	0.0331716	-0.0564063	0.0895779	8.71683e-05	0.000289705	0
TCGA	GOBP_APOPTOTIC_MITOCHONDRIAL_CHANGES	-0.00888957	-0.0165255	0.00763593	0.428563	0.513203	0
TCGA	GOBP_CARBOHYDRATE_TRANSPORT	-0.0400683	0.0096643	-0.0497326	0.00168239	0.00405997	0
TCGA	GOBP_DNA_METHYLATION	-0.006726	-0.00267422	-0.00405178	0.654997	0.721847	1
TCGA	GOBP_PHOSPHOLIPID_BIOSYNTHETIC_PROCESS	-0.0820035	-0.016286	-0.0657175	5.09716e-06	2.20718e-05	0
TCGA	GOBP_PYRIMIDINE_CONTAINING_COMPOUND_SALVAGE	0.152419	-0.0590738	0.211493	1.13273e-07	6.64578e-07	0
TCGA	GOBP_AEROBIC_RESPIRATION	-0.0639139	-0.0416352	-0.0222787	0.944637	0.958615	0
TCGA	GOBP_DNA_METHYLATION_DEPENDENT_HETEROCHROMATIN_ASSEMBLY	-0.000228312	-0.0394683	0.03924	0.451246	0.53594	1
TCGA	GOBP_DNA_METHYLATION_OR_DEMETHYLATION	0.0391003	-0.0348614	0.0739616	0.0134471	0.0257234	1
TCGA	GOBP_DNA_REPLICATION	0.0765197	-0.110464	0.186984	0.00109915	0.00276971	1
TCGA	GOBP_DNA_REPLICATION_INITIATION	0.205489	-0.101475	0.306965	7.42936e-05	0.000249861	1
TCGA	GOBP_DNA_SYNTHESIS_INVOLVED_IN_DNA_REPAIR	0.0665399	-0.100628	0.167168	1.64115e-05	6.4917e-05	1
TCGA	GOBP_FATTY_ACID_BETA_OXIDATION	-0.120248	0.00315071	-0.123399	6.69131e-05	0.000226389	1
TCGA	GOBP_FATTY_ACID_BETA_OXIDATION_USING_ACYL_COA_OXIDASE	-0.103707	0.0160234	-0.11973	0.00269599	0.00618822	1
TCGA	GOBP_FATTY_ACID_BIOSYNTHETIC_PROCESS	-0.0297274	0.0122673	-0.0419946	0.0171005	0.0318595	1
TCGA	GOBP_FATTY_ACID_CATABOLIC_PROCESS	-0.101948	-0.0116217	-0.0903262	0.000318173	0.000926938	1
TCGA	GOBP_SERINE_FAMILY_AMINO_ACID_CATABOLIC_PROCESS	-0.0481356	0.020278	-0.0684135	0.0808699	0.124444	0
TCGA	GOBP_FATTY_ACID_DERIVATIVE_BIOSYNTHETIC_PROCESS	-0.0848567	0.0108705	-0.0957272	7.85802e-05	0.000262884	1
TCGA	GOBP_FATTY_ACID_DERIVATIVE_CATABOLIC_PROCESS	-0.0205954	0.0141731	-0.0347685	0.307001	0.388536	1
TCGA	GOBP_FATTY_ACID_DERIVATIVE_METABOLIC_PROCESS	-0.0640876	0.00996526	-0.0740528	0.000215082	0.00065637	1
TCGA	GOBP_FATTY_ACID_HOMEOSTASIS	-0.0604245	-0.0127719	-0.0476525	0.0803715	0.123827	1
TCGA	GOBP_METHIONINE_BIOSYNTHETIC_PROCESS	-0.095879	0.005628	-0.101507	0.0547386	0.0886968	0
TCGA	GOBP_GLYCOPROTEIN_METABOLIC_PROCESS	-0.0417718	-0.0143046	-0.0274673	0.0101032	0.0199665	0
TCGA	GOBP_GLYCOPROTEIN_BIOSYNTHETIC_PROCESS	-0.0548666	-0.00892477	-0.0459418	0.000114014	0.000370198	0
TCGA	GOBP_VITAMIN_BIOSYNTHETIC_PROCESS	0.163631	-0.081565	0.245196	4.62808e-19	1.30486e-17	0
TCGA	GOBP_VITAMIN_CATABOLIC_PROCESS	0.0719924	0.0615367	0.0104558	0.908872	0.930507	0
TCGA	GOBP_NUCLEOBASE_METABOLIC_PROCESS	0.0626086	-0.0406025	0.103211	0.00627237	0.0131105	0
TCGA	GOBP_PURINE_NUCLEOBASE_BIOSYNTHETIC_PROCESS	0.166316	-0.157573	0.323889	0.000217531	0.000662647	0
TCGA	GOBP_NUCLEOSIDE_METABOLIC_PROCESS	0.089954	-0.0634472	0.153401	2.28753e-13	2.91689e-12	0
TCGA	GOBP_RIBONUCLEOSIDE_METABOLIC_PROCESS	0.102783	-0.077538	0.180321	2.85112e-16	5.33928e-15	0
TCGA	GOBP_NUCLEOSIDE_MONOPHOSPHATE_METABOLIC_PROCESS	0.0406659	-0.0592097	0.0998756	3.68234e-07	1.96301e-06	0
TCGA	GOBP_NUCLEOSIDE_MONOPHOSPHATE_BIOSYNTHETIC_PROCESS	0.0426966	-0.0714761	0.114173	0.00015318	0.000484655	0
TCGA	GOBP_NUCLEOSIDE_MONOPHOSPHATE_CATABOLIC_PROCESS	0.219304	-0.0589861	0.27829	3.33691e-13	4.12039e-12	0
TCGA	GOBP_PURINE_NUCLEOSIDE_MONOPHOSPHATE_METABOLIC_PROCESS	0.0354108	-0.0569139	0.0923248	6.22488e-06	2.64805e-05	0
TCGA	GOBP_PURINE_NUCLEOSIDE_MONOPHOSPHATE_BIOSYNTHETIC_PROCESS	0.106491	-0.0897886	0.19628	3.38439e-06	1.51596e-05	0
TCGA	GOBP_PYRIMIDINE_NUCLEOSIDE_MONOPHOSPHATE_METABOLIC_PROCESS	0.0251966	-0.0583859	0.0835825	0.000283719	0.000836648	0
TCGA	GOBP_PYRIMIDINE_NUCLEOSIDE_MONOPHOSPHATE_BIOSYNTHETIC_PROCESS	-0.0461748	-0.0839029	0.0377281	0.277607	0.357034	0
TCGA	GOBP_NUCLEOSIDE_DIPHOSPHATE_METABOLIC_PROCESS	-0.00221251	-0.0266652	0.0244527	0.167364	0.232641	0
TCGA	GOBP_NUCLEOSIDE_DIPHOSPHATE_BIOSYNTHETIC_PROCESS	0.0464131	-0.0504386	0.0968517	0.00579689	0.0122173	0
TCGA	GOBP_NUCLEOSIDE_DIPHOSPHATE_CATABOLIC_PROCESS	-0.0932932	-0.0161332	-0.0771601	0.00963785	0.0191362	0
TCGA	GOBP_NUCLEOSIDE_TRIPHOSPHATE_METABOLIC_PROCESS	0.00419024	-0.0781589	0.0823492	0.00627237	0.0131105	0
TCGA	GOBP_NUCLEOSIDE_TRIPHOSPHATE_BIOSYNTHETIC_PROCESS	-0.0191473	-0.0655591	0.0464117	0.0722747	0.112513	0
TCGA	GOBP_NUCLEOSIDE_TRIPHOSPHATE_CATABOLIC_PROCESS	0.0372156	-0.0735571	0.110773	0.00290665	0.00660603	0
TCGA	GOBP_PYRIMIDINE_NUCLEOSIDE_TRIPHOSPHATE_METABOLIC_PROCESS	0.0509517	-0.0553918	0.106343	0.0448357	0.0744571	0
TCGA	GOBP_PYRIMIDINE_NUCLEOSIDE_TRIPHOSPHATE_BIOSYNTHETIC_PROCESS	0.0673656	-0.0518877	0.119253	0.011402	0.0222131	0
TCGA	GOBP_PURINE_DEOXYRIBONUCLEOTIDE_METABOLIC_PROCESS	0.120278	-0.119014	0.239292	3.36345e-10	2.88824e-09	0
TCGA	GOBP_RIBONUCLEOSIDE_MONOPHOSPHATE_BIOSYNTHETIC_PROCESS	0.0426957	-0.076198	0.118894	0.00138968	0.00341531	0
TCGA	GOBP_RIBONUCLEOSIDE_MONOPHOSPHATE_METABOLIC_PROCESS	0.0079594	-0.0634316	0.071391	0.000136408	0.000436213	0
TCGA	GOBP_DEOXYRIBONUCLEOSIDE_MONOPHOSPHATE_METABOLIC_PROCESS	0.212397	-0.115037	0.327435	4.46109e-13	5.40335e-12	0
TCGA	GOBP_NUCLEOSIDE_CATABOLIC_PROCESS	0.231475	-0.0849552	0.31643	1.00885e-21	5.17162e-20	0
TCGA	GOBP_PYRIMIDINE_RIBONUCLEOSIDE_MONOPHOSPHATE_METABOLIC_PROCESS	-0.00078724	-0.0264544	0.0256671	0.514524	0.594944	0
TCGA	GOBP_CYCLIC_NUCLEOTIDE_METABOLIC_PROCESS	-0.0962256	0.0524758	-0.148701	1.69895e-05	6.68906e-05	0
TCGA	GOBP_CYCLIC_NUCLEOTIDE_BIOSYNTHETIC_PROCESS	-0.0800172	0.0812764	-0.161294	2.1986e-05	8.40205e-05	0
TCGA	GOBP_RIBONUCLEOSIDE_TRIPHOSPHATE_METABOLIC_PROCESS	-0.0064903	-0.0664975	0.0600072	0.0290069	0.0506921	0
TCGA	GOBP_DEOXYRIBONUCLEOSIDE_TRIPHOSPHATE_METABOLIC_PROCESS	0.0864717	-0.120178	0.20665	3.66797e-08	2.30669e-07	0
TCGA	GOBP_RIBONUCLEOSIDE_TRIPHOSPHATE_BIOSYNTHETIC_PROCESS	-0.0358854	-0.066287	0.0304016	0.149295	0.211286	0
TCGA	GOBP_PYRIMIDINE_RIBONUCLEOSIDE_TRIPHOSPHATE_METABOLIC_PROCESS	-0.0173915	-0.053165	0.0357734	0.724116	0.780728	0
TCGA	GOBP_PYRIMIDINE_RIBONUCLEOSIDE_TRIPHOSPHATE_BIOSYNTHETIC_PROCESS	0.0196138	-0.0439147	0.0635285	0.731309	0.786645	0
TCGA	GOBP_CYCLIC_NUCLEOTIDE_CATABOLIC_PROCESS	-0.179122	0.0101937	-0.189315	0.000351334	0.00101136	0
TCGA	GOBP_PYRIMIDINE_RIBONUCLEOTIDE_METABOLIC_PROCESS	-0.00762386	-0.0366501	0.0290262	0.804443	0.846299	0
TCGA	GOBP_PYRIMIDINE_DEOXYRIBONUCLEOTIDE_METABOLIC_PROCESS	0.0501031	-0.0679411	0.118044	2.81239e-05	0.000104105	0
TCGA	GOBP_PYRIMIDINE_RIBONUCLEOTIDE_BIOSYNTHETIC_PROCESS	-0.0291404	-0.040838	0.0116976	0.950738	0.962496	0
TCGA	GOBP_NUCLEOTIDE_SUGAR_METABOLIC_PROCESS	0.0103089	-0.0515526	0.0618615	0.0847746	0.129627	0
TCGA	GOBP_NUCLEOTIDE_SUGAR_BIOSYNTHETIC_PROCESS	0.0320384	-0.0851078	0.117146	0.00411504	0.0090172	0
TCGA	GOBP_COBALAMIN_METABOLIC_PROCESS	0.00271704	-0.00445116	0.00716821	0.488913	0.570399	0
TCGA	GOBP_GLYCOLIPID_BIOSYNTHETIC_PROCESS	-0.0646048	-0.0166064	-0.0479984	0.00169897	0.00409027	0
TCGA	GOBP_GLUCAN_BIOSYNTHETIC_PROCESS	-0.0766741	-0.00342159	-0.0732525	1.01202e-06	4.94797e-06	0
TCGA	GOBP_RIBONUCLEOTIDE_CATABOLIC_PROCESS	-0.0222754	0.00536756	-0.027643	0.33742	0.420119	0
TCGA	GOBP_DEOXYRIBONUCLEOTIDE_METABOLIC_PROCESS	0.0767975	-0.0664339	0.143231	1.63223e-07	9.27612e-07	0
TCGA	GOBP_DEOXYRIBONUCLEOTIDE_BIOSYNTHETIC_PROCESS	0.0948721	-0.0953911	0.190263	4.95946e-06	2.15122e-05	0
TCGA	GOBP_RESPONSE_TO_TEMPERATURE_STIMULUS	-0.0174283	-0.0236134	0.00618511	0.408727	0.494585	0
TCGA	GOBP_CELLULAR_RESPONSE_TO_STARVATION	-0.0677657	-0.00367001	-0.0640957	1.2094e-05	4.87508e-05	0
TCGA	GOBP_RESPONSE_TO_PH	0.0470236	0.0227625	0.0242611	0.32597	0.408267	0
TCGA	GOBP_MRNA_TRANSCRIPTION	0.03855	-0.0047629	0.0433129	0.552926	0.629029	0
TCGA	GOBP_SNRNA_TRANSCRIPTION	-0.0243609	-0.0505862	0.0262252	0.307001	0.388536	0
TCGA	GOBP_RRNA_TRANSCRIPTION	-0.0795824	-0.0496458	-0.0299366	0.748667	0.800735	0
TCGA	GOBP_AMINE_METABOLIC_PROCESS	0.111061	-0.0604298	0.171491	2.18025e-10	1.92766e-09	0
TCGA	GOBP_AMINE_BIOSYNTHETIC_PROCESS	0.060765	-0.00207944	0.0628444	0.00567905	0.0120188	0
TCGA	GOBP_AMINE_CATABOLIC_PROCESS	0.0975986	-0.00486851	0.102467	0.000216712	0.000660548	0
TCGA	GOBP_OLIGOSACCHARIDE_METABOLIC_PROCESS	0.0265309	-0.00888378	0.0354147	0.113025	0.165828	0
TCGA	GOBP_OLIGOSACCHARIDE_BIOSYNTHETIC_PROCESS	-0.027704	-0.00582215	-0.0218818	0.545899	0.62341	0
TCGA	GOBP_OLIGOSACCHARIDE_CATABOLIC_PROCESS	0.126586	-0.0127035	0.139289	0.000936789	0.00239869	0
TCGA	GOBP_RESPONSE_TO_RADIATION	-0.0153237	-0.0224579	0.00713417	0.381061	0.465099	0
TCGA	GOBP_PHOSPHOLIPID_CATABOLIC_PROCESS	0.00950016	-0.0183792	0.0278794	0.15229	0.214627	0
TCGA	GOBP_TOXIN_METABOLIC_PROCESS	0.0238752	0.0717408	-0.0478656	0.0928547	0.140124	0
TCGA	GOBP_RESPONSE_TO_HEAT	-0.00430877	-0.0388987	0.03459	0.125743	0.181653	0
TCGA	GOBP_RESPONSE_TO_COLD	-0.0933337	0.0208125	-0.114146	2.78875e-05	0.000103381	0
TCGA	GOBP_RESPONSE_TO_XENOBIOTIC_STIMULUS	0.0106697	0.05856	-0.0478903	0.0721228	0.112381	0
TCGA	GOBP_RESPONSE_TO_UV	-0.0190779	-0.0335026	0.0144247	0.0709176	0.110672	0
TCGA	GOBP_RESPONSE_TO_WATER	0.0710761	-0.0127542	0.0838303	0.0655564	0.103548	0
TCGA	GOBP_RESPONSE_TO_LIGHT_STIMULUS	-0.0369534	-0.00302675	-0.0339266	0.00191623	0.00456351	0
TCGA	GOBP_NAD_BIOSYNTHETIC_PROCESS	0.0685963	-0.00434031	0.0729366	0.000664847	0.00177025	0
TCGA	GOBP_CARNITINE_METABOLIC_PROCESS	-0.0676929	-0.0210935	-0.0465994	0.114997	0.168528	0
TCGA	GOBP_RNA_MODIFICATION	-0.01969	-0.0719058	0.0522157	0.0452459	0.0750156	0
TCGA	GOBP_FERTILIZATION	0.0116745	0.0348801	-0.0232056	0.0214341	0.0389049	0
TCGA	GOBP_DETECTION_OF_ABIOTIC_STIMULUS	-0.0305589	0.0391722	-0.0697311	1.42815e-05	5.68461e-05	0
TCGA	GOBP_DETECTION_OF_LIGHT_STIMULUS	-0.0097854	0.0226231	-0.0324085	0.00276461	0.00632	0
TCGA	GOBP_DETECTION_OF_CHEMICAL_STIMULUS	0.12823	0.151603	-0.0233729	0.917228	0.936607	0
TCGA	GOBP_DETECTION_OF_BIOTIC_STIMULUS	0.271093	-0.0823269	0.35342	3.87463e-10	3.3104e-09	0
TCGA	GOBP_RESPONSE_TO_MECHANICAL_STIMULUS	0.030169	-0.00690897	0.037078	0.156727	0.219904	0
TCGA	GOBP_RESPONSE_TO_VIRUS	0.177914	-0.0762553	0.254169	5.1262e-28	2.00119e-25	0
TCGA	GOBP_RESPONSE_TO_FUNGUS	0.223859	0.00325048	0.220608	3.56305e-14	4.99516e-13	0
TCGA	GOBP_RESPONSE_TO_GRAVITY	0.0536786	0.00876908	0.0449095	0.540816	0.618441	0
TCGA	GOBP_RESPONSE_TO_TOXIC_SUBSTANCE	-0.0133122	0.0104913	-0.0238036	0.310644	0.392853	0
TCGA	GOBP_RESPONSE_TO_LIGHT_INTENSITY	-0.112652	0.0435657	-0.156217	2.88893e-06	1.31846e-05	0
TCGA	GOBP_PHOTOPERIODISM	-0.0846357	0.0150409	-0.0996767	3.20088e-06	1.44524e-05	0
TCGA	GOBP_ENTRAINMENT_OF_CIRCADIAN_CLOCK	-0.118357	0.0252678	-0.143625	6.85477e-09	4.87226e-08	0
TCGA	GOBP_UV_PROTECTION	-0.0396553	-0.0209997	-0.0186555	0.0519035	0.084725	0
TCGA	GOBP_RESPONSE_TO_SALT_STRESS	-0.0158363	0.0453708	-0.0612071	0.00160695	0.00389274	0
TCGA	GOBP_CATECHOL_CONTAINING_COMPOUND_METABOLIC_PROCESS	0.0324107	0.0537972	-0.0213865	0.383147	0.467421	0
TCGA	GOBP_CATECHOL_CONTAINING_COMPOUND_BIOSYNTHETIC_PROCESS	0.0991725	0.0653662	0.0338063	0.18102	0.248761	0
TCGA	GOBP_RESPONSE_TO_CARBOHYDRATE	-0.0353114	0.023353	-0.0586644	3.00713e-07	1.63571e-06	0
TCGA	GOBP_HORMONE_MEDIATED_SIGNALING_PATHWAY	-0.0531046	0.0268854	-0.0799899	6.90574e-06	2.91569e-05	0
TCGA	GOBP_POST_EMBRYONIC_DEVELOPMENT	-0.0270308	0.0287886	-0.0558194	0.0140346	0.0266762	0
TCGA	GOBP_AXIS_SPECIFICATION	-0.117173	0.0687723	-0.185946	6.27751e-15	9.65405e-14	0
TCGA	GOBP_SPECIFICATION_OF_SYMMETRY	-0.0786834	0.022373	-0.101056	3.69576e-06	1.63665e-05	0
TCGA	GOBP_FLAVONOID_METABOLIC_PROCESS	-0.0241262	0.105638	-0.129764	0.0370933	0.0629594	0
TCGA	GOBP_EMBRYONIC_PATTERN_SPECIFICATION	-0.0998903	0.0633928	-0.163283	6.55326e-14	8.94026e-13	0
TCGA	GOBP_POST_EMBRYONIC_ANIMAL_MORPHOGENESIS	0.105512	-0.0204442	0.125957	0.000255634	0.000763142	0
TCGA	GOBP_NEGATIVE_REGULATION_OF_CATABOLIC_PROCESS	-0.0279446	-0.00489241	-0.0230522	0.00314197	0.00706492	0
TCGA	GOBP_POSITIVE_REGULATION_OF_CATABOLIC_PROCESS	-0.0367413	-0.0167954	-0.0199459	0.102949	0.152947	0
TCGA	GOBP_EPIDERMAL_CELL_DIFFERENTIATION	0.0322364	0.0640525	-0.0318161	0.00581391	0.0122481	0
TCGA	GOBP_HORMONE_TRANSPORT	-0.0370542	0.0503652	-0.0874194	3.5433e-11	3.47148e-10	0
TCGA	GOBP_ANTERIOR_POSTERIOR_AXIS_SPECIFICATION	-0.0726709	0.0518637	-0.124535	6.58619e-09	4.70773e-08	0
TCGA	GOBP_ANTERIOR_POSTERIOR_PATTERN_SPECIFICATION	-0.0901164	0.0650628	-0.155179	2.50998e-11	2.50751e-10	0
TCGA	GOBP_DORSAL_VENTRAL_PATTERN_FORMATION	-0.0613932	0.0818919	-0.143285	4.1934e-15	6.56836e-14	0
TCGA	GOBP_PROXIMAL_DISTAL_PATTERN_FORMATION	-0.0763324	0.0744663	-0.150799	4.7162e-06	2.04921e-05	0
TCGA	GOBP_CELL_CELL_RECOGNITION	0.107911	-0.0114177	0.119329	2.33498e-09	1.78464e-08	0
TCGA	GOBP_RESPONSE_TO_EXTRACELLULAR_STIMULUS	0.00584197	0.00351971	0.00232226	0.675176	0.739111	0
TCGA	GOBP_OOCYTE_DIFFERENTIATION	0.0208015	-0.000689687	0.0214911	0.268388	0.346671	0
TCGA	GOBP_GLIAL_CELL_DIFFERENTIATION	0.000745739	0.0171157	-0.01637	0.0659783	0.104117	0
TCGA	GOBP_CARDIOBLAST_DIFFERENTIATION	-0.00411487	0.0704814	-0.0745963	0.0870481	0.132584	0
TCGA	GOBP_RESPONSE_TO_METAL_ION	-0.0118429	0.0147854	-0.0266283	0.0439242	0.0731589	0
TCGA	GOBP_RESPONSE_TO_IRON_ION	0.0745147	0.016059	0.0584557	0.0891903	0.135319	0
TCGA	GOBP_RESPONSE_TO_MANGANESE_ION	-0.0251075	-0.0015314	-0.0235761	0.455862	0.540411	0
TCGA	GOBP_RESPONSE_TO_ZINC_ION	0.0752078	0.0139322	0.0612756	0.00823699	0.0167345	0
TCGA	GOBP_SPECIFICATION_OF_ANIMAL_ORGAN_IDENTITY	-0.126864	0.0876179	-0.214482	3.66381e-07	1.95519e-06	0
TCGA	GOBP_REGULATION_OF_PROTON_TRANSPORT	0.0722607	-0.0392811	0.111542	0.00741434	0.0152401	0
TCGA	GOBP_RESPONSE_TO_X_RAY	0.0477402	-0.0379117	0.0856518	0.00658947	0.0137337	0
TCGA	GOBP_BODY_MORPHOGENESIS	-0.0844821	0.0203957	-0.104878	2.08864e-06	9.74249e-06	0
TCGA	GOBP_EMBRYONIC_BODY_MORPHOGENESIS	-0.185085	0.0584266	-0.243511	2.47612e-09	1.87557e-08	0
TCGA	GOBP_RESPONSE_TO_IONIZING_RADIATION	0.0226621	-0.0650126	0.0876747	0.000822081	0.00213842	0
TCGA	GOBP_RESPONSE_TO_UV_B	0.0531244	-0.0138195	0.0669439	0.215714	0.289004	0
TCGA	GOBP_RESPONSE_TO_UV_C	0.0165525	-0.0738684	0.0904209	0.00236813	0.00552819	0
TCGA	GOBP_RESPONSE_TO_LITHIUM_ION	-0.0200213	0.0739666	-0.0939879	9.03423e-05	0.000299274	0
TCGA	GOBP_VASCULAR_TRANSPORT	-0.0774369	0.0304112	-0.107848	4.26353e-06	1.86369e-05	0
TCGA	GOBP_ESTABLISHMENT_OR_MAINTENANCE_OF_TRANSMEMBRANE_ELECTROCHEMICAL_GRADIENT	0.0257214	0.0324815	-0.00676007	0.324087	0.40651	0
TCGA	GOBP_ENDOMEMBRANE_SYSTEM_ORGANIZATION	-0.0549909	-0.0110846	-0.0439063	0.00292487	0.00664148	0
TCGA	GOBP_NADH_DEHYDROGENASE_COMPLEX_ASSEMBLY	-0.00340235	-0.096408	0.0930057	0.311559	0.393519	0
TCGA	GOBP_MULTICELLULAR_ORGANISM_AGING	-0.021359	0.0108709	-0.0322299	0.312017	0.393902	0
TCGA	GOBP_RESPONSE_TO_SELENIUM_ION	0.0939102	0.016296	0.0776142	0.0148399	0.0281227	0
TCGA	GOBP_RESPONSE_TO_LEAD_ION	-0.0880582	0.0134511	-0.101509	0.0010167	0.00258116	0
TCGA	GOBP_REGULATION_OF_HYDROGEN_PEROXIDE_METABOLIC_PROCESS	0.0335751	0.0229238	0.0106514	0.795562	0.839916	0
TCGA	GOBP_MEMBRANE_INVAGINATION	0.111155	-0.0358371	0.146992	1.95854e-05	7.61072e-05	0
TCGA	GOBP_RESPONSE_TO_GAMMA_RADIATION	0.0291801	-0.0698008	0.0989809	4.81174e-05	0.000168295	0
TCGA	GOBP_HISTONE_MONOUBIQUITINATION	-0.0798371	-0.0481102	-0.0317269	0.468694	0.551629	0
TCGA	GOBP_RESPONSE_TO_ACIDIC_PH	0.0707643	0.0254627	0.0453016	0.229887	0.304138	0
TCGA	GOBP_HISTONE_H3_K36_METHYLATION	-0.150194	0.0133867	-0.16358	0.000788657	0.00205781	0
TCGA	GOBP_REGULATION_OF_CELL_FATE_COMMITMENT	0.0413548	-0.00350397	0.0448588	0.0730377	0.113666	0
TCGA	GOBP_NEGATIVE_REGULATION_OF_CELL_FATE_COMMITMENT	0.0501986	0.0358195	0.0143791	0.625537	0.695117	0
TCGA	GOBP_CENTRIOLE_CENTRIOLE_COHESION	-0.0777548	-0.0541219	-0.023633	0.799999	0.843373	0
TCGA	GOBP_EXIT_FROM_MITOSIS	0.0347678	-0.0522064	0.0869743	0.00328122	0.00734871	0
TCGA	GOBP_POSITIVE_REGULATION_OF_HEART_RATE	-0.0367766	0.0649652	-0.101742	0.000343697	0.000993316	0
TCGA	GOBP_MESENCHYMAL_CELL_PROLIFERATION	-0.099078	0.0628858	-0.161964	1.22542e-07	7.14826e-07	0
TCGA	GOBP_REGULATION_OF_MESENCHYMAL_CELL_PROLIFERATION	-0.0965859	0.0622098	-0.158796	3.89232e-07	2.06627e-06	0
TCGA	GOBP_NEGATIVE_REGULATION_OF_PEPTIDASE_ACTIVITY	0.096978	0.023147	0.073831	0.000541714	0.00148125	0
TCGA	GOBP_REGULATION_OF_SIGNALING_RECEPTOR_ACTIVITY	0.0409901	0.0175688	0.0234212	0.298909	0.380287	0
TCGA	GOBP_REGULATION_OF_GASTRULATION	-0.0423239	0.00892739	-0.0512513	0.0323313	0.0556586	0
TCGA	GOBP_PROTEASOMAL_PROTEIN_CATABOLIC_PROCESS	-0.00850079	-0.045532	0.0370312	0.0571988	0.091862	0
TCGA	GOBP_PROTEASOMAL_UBIQUITIN_INDEPENDENT_PROTEIN_CATABOLIC_PROCESS	0.339825	-0.154853	0.494678	9.22566e-16	1.63137e-14	0
TCGA	GOBP_REGULATION_OF_AUTOPHAGY	-0.0294818	-0.0339166	0.00443482	0.465175	0.54825	0
TCGA	GOBP_NEGATIVE_REGULATION_OF_AUTOPHAGY	-0.0366267	-0.0208291	-0.0157975	0.714087	0.772541	0
TCGA	GOBP_POSITIVE_REGULATION_OF_AUTOPHAGY	-0.0118006	-0.0290581	0.0172575	0.808151	0.84932	0
TCGA	GOBP_REGULATION_OF_PHOSPHOLIPASE_ACTIVITY	0.109431	-0.0212437	0.130675	0.0130209	0.0250118	0
TCGA	GOBP_REGULATION_OF_CALCIUM_ION_TRANSPORT_INTO_CYTOSOL	0.069422	-0.0360736	0.105496	2.49813e-05	9.37722e-05	0
TCGA	GOBP_NEGATIVE_REGULATION_OF_CALCIUM_ION_TRANSPORT_INTO_CYTOSOL	0.0526467	0.0042907	0.048356	0.0807035	0.124263	0
TCGA	GOBP_POSITIVE_REGULATION_OF_CALCIUM_ION_TRANSPORT_INTO_CYTOSOL	0.0905157	-0.0360822	0.126598	1.56992e-06	7.47404e-06	0
TCGA	GOBP_REGULATION_OF_TRANSPOSITION	0.282869	-0.0722534	0.355123	1.22734e-24	1.16496e-22	0
TCGA	GOBP_REGULATION_OF_PLATELET_ACTIVATION	0.146472	-0.0371756	0.183647	0.000139617	0.000444516	0
TCGA	GOBP_NEGATIVE_REGULATION_OF_PLATELET_ACTIVATION	0.0642635	-0.00545945	0.069723	0.0305935	0.0529723	0
TCGA	GOBP_NEGATIVE_REGULATION_OF_PHOSPHORUS_METABOLIC_PROCESS	-0.00712784	-0.0161076	0.00897972	0.845455	0.878699	0
TCGA	GOBP_REGULATION_OF_CELLULAR_KETONE_METABOLIC_PROCESS	0.0347966	-0.0399311	0.0747277	0.000338692	0.000980527	0
TCGA	GOBP_REGULATION_OF_KETONE_BIOSYNTHETIC_PROCESS	-0.184115	0.029726	-0.213841	3.62829e-08	2.28456e-07	0
TCGA	GOBP_REGULATION_OF_DOUBLE_STRAND_BREAK_REPAIR_VIA_HOMOLOGOUS_RECOMBINATION	0.058973	-0.102439	0.161412	0.000581548	0.00157406	0
TCGA	GOBP_VASCULAR_ENDOTHELIAL_GROWTH_FACTOR_PRODUCTION	0.0708712	0.00387849	0.0669927	0.00253922	0.00587086	0
TCGA	GOBP_POSITIVE_REGULATION_OF_VASCULAR_ENDOTHELIAL_GROWTH_FACTOR_PRODUCTION	0.0931201	-0.00475275	0.0978728	0.00220766	0.00518219	0
TCGA	GOBP_MIRNA_METABOLIC_PROCESS	-0.0843751	-0.00250776	-0.0818674	0.358573	0.442871	0
TCGA	GOBP_MIRNA_CATABOLIC_PROCESS	-0.080107	-0.0316873	-0.0484197	0.153943	0.216535	0
TCGA	GOBP_REGULATION_OF_LAMELLIPODIUM_ASSEMBLY	-0.0289419	-0.0237274	-0.00521449	0.15955	0.223124	0
TCGA	GOBP_POSITIVE_REGULATION_OF_LAMELLIPODIUM_ASSEMBLY	-0.00517417	-0.0245319	0.0193578	0.33071	0.413184	0
TCGA	GOBP_REGULATION_OF_ENDOTHELIAL_CELL_MIGRATION	-0.0342509	-0.0105441	-0.0237068	0.624858	0.694972	0
TCGA	GOBP_POSITIVE_REGULATION_OF_ENDOTHELIAL_CELL_MIGRATION	-0.0482001	-0.00475252	-0.0434476	0.651542	0.718821	0
TCGA	GOBP_PROGRAMMED_CELL_DEATH_INVOLVED_IN_CELL_DEVELOPMENT	0.143553	-0.0634812	0.207034	4.32572e-07	2.27492e-06	0
TCGA	GOBP_REGULATION_OF_EPITHELIAL_CELL_MIGRATION	-0.0434203	-0.00125037	-0.0421699	0.65638	0.722902	0
TCGA	GOBP_NEGATIVE_REGULATION_OF_EPITHELIAL_CELL_MIGRATION	-0.0185352	-0.00802293	-0.0105123	0.455284	0.539978	0
TCGA	GOBP_POSITIVE_REGULATION_OF_EPITHELIAL_CELL_MIGRATION	-0.0333506	-0.0122631	-0.0210876	0.755939	0.806811	0
TCGA	GOBP_REGULATION_OF_MITOCHONDRIAL_FUSION	-0.107318	-0.0399765	-0.0673416	0.00696088	0.0144131	0
TCGA	GOBP_NEGATIVE_REGULATION_OF_ORGANELLE_ORGANIZATION	-0.0300152	-0.0376479	0.00763272	0.491926	0.573254	0
TCGA	GOBP_REGULATION_OF_PLATELET_DERIVED_GROWTH_FACTOR_RECEPTOR_SIGNALING_PATHWAY	-0.0236006	-0.00390287	-0.0196978	0.701974	0.762363	0
TCGA	GOBP_NEGATIVE_REGULATION_OF_PLATELET_DERIVED_GROWTH_FACTOR_RECEPTOR_SIGNALING_PATHWAY	-0.0234944	-0.0164999	-0.00699454	0.750846	0.802389	0
TCGA	GOBP_CELL_COMMUNICATION_BY_ELECTRICAL_COUPLING	-0.0441631	0.0417467	-0.0859098	0.0168792	0.0314818	0
TCGA	GOBP_REGULATION_OF_CELL_COMMUNICATION_BY_ELECTRICAL_COUPLING	-0.0167629	0.0343256	-0.0510885	0.36971	0.454085	0
TCGA	GOBP_NEGATIVE_REGULATION_OF_MUSCLE_CELL_APOPTOTIC_PROCESS	0.00420017	0.00790068	-0.00370052	0.478151	0.560679	0
TCGA	GOBP_MUSCLE_CELL_APOPTOTIC_PROCESS	-0.000170393	-0.0161938	0.0160234	0.212183	0.285026	0
TCGA	GOBP_STRIATED_MUSCLE_CELL_APOPTOTIC_PROCESS	-0.0820143	0.0264657	-0.10848	6.28144e-06	2.66987e-05	0
TCGA	GOBP_POSITIVE_REGULATION_OF_MUSCLE_CELL_APOPTOTIC_PROCESS	0.0783363	-0.0601705	0.138507	3.02693e-06	1.37526e-05	0
TCGA	GOBP_POSITIVE_REGULATION_OF_STRIATED_MUSCLE_CELL_APOPTOTIC_PROCESS	-0.0964824	0.0331997	-0.129682	0.0004815	0.00133604	0
TCGA	GOBP_NEGATIVE_REGULATION_OF_STRIATED_MUSCLE_CELL_APOPTOTIC_PROCESS	-0.0306213	0.0282691	-0.0588904	0.0034899	0.00776808	0
TCGA	GOBP_EPITHELIAL_STRUCTURE_MAINTENANCE	-0.029963	0.0339999	-0.063963	0.0235244	0.0420078	0
TCGA	GOBP_REGULATION_OF_CELLULAR_CARBOHYDRATE_METABOLIC_PROCESS	-0.0604569	0.00128273	-0.0617397	3.44827e-07	1.85775e-06	0
TCGA	GOBP_POSITIVE_REGULATION_OF_CELLULAR_CARBOHYDRATE_METABOLIC_PROCESS	-0.0287163	0.00980214	-0.0385184	0.059491	0.0950919	0
TCGA	GOBP_REGULATION_OF_COLLAGEN_METABOLIC_PROCESS	0.0485662	-0.0129616	0.0615278	0.0463902	0.0766625	0
TCGA	GOBP_NEGATIVE_REGULATION_OF_COLLAGEN_METABOLIC_PROCESS	0.0828916	-0.030591	0.113483	0.000344959	0.000995829	0
TCGA	GOBP_POSITIVE_REGULATION_OF_COLLAGEN_METABOLIC_PROCESS	0.0304921	0.0121374	0.0183547	0.610688	0.681602	0
TCGA	GOBP_REGULATION_OF_EXTRACELLULAR_MATRIX_DISASSEMBLY	0.115117	-0.0514704	0.166587	0.0139599	0.0265741	0
TCGA	GOBP_REGULATION_OF_EPITHELIAL_TO_MESENCHYMAL_TRANSITION	-0.0716675	-0.00351337	-0.0681542	0.0108836	0.0213425	0
TCGA	GOBP_POSITIVE_REGULATION_OF_EPITHELIAL_TO_MESENCHYMAL_TRANSITION	0.00136689	-0.0374545	0.0388214	0.472229	0.555273	0
TCGA	GOBP_NEGATIVE_REGULATION_OF_EPITHELIAL_TO_MESENCHYMAL_TRANSITION	-0.143832	0.0344213	-0.178254	1.77454e-10	1.58832e-09	0
TCGA	GOBP_POSITIVE_REGULATION_OF_CELL_DEVELOPMENT	0.0128778	0.0041044	0.00877338	0.572966	0.64733	0
TCGA	GOBP_NEGATIVE_REGULATION_OF_CELL_DEVELOPMENT	-0.0300055	0.03448	-0.0644855	0.00144608	0.00354363	0
TCGA	GOBP_PROTEIN_KINASE_A_SIGNALING	-0.0157714	0.02293	-0.0387014	0.189601	0.258593	0
TCGA	GOBP_REGULATION_OF_PROTEIN_KINASE_A_SIGNALING	-0.0467805	0.0249912	-0.0717717	0.0117171	0.0227484	0
TCGA	GOBP_POSITIVE_REGULATION_OF_PROTEIN_KINASE_A_SIGNALING	-0.050635	0.0714776	-0.122113	0.00561268	0.0118933	0
TCGA	GOBP_REGULATION_OF_MACROPHAGE_DERIVED_FOAM_CELL_DIFFERENTIATION	0.1071	0.0140222	0.0930781	0.00435811	0.00947618	0
TCGA	GOBP_POSITIVE_REGULATION_OF_MACROPHAGE_DERIVED_FOAM_CELL_DIFFERENTIATION	0.101109	0.0617583	0.0393505	0.114997	0.168528	0
TCGA	GOBP_NEGATIVE_REGULATION_OF_MACROPHAGE_DERIVED_FOAM_CELL_DIFFERENTIATION	0.128993	-0.0202538	0.149246	6.47856e-05	0.000220071	0
TCGA	GOBP_REGULATION_OF_CGMP_MEDIATED_SIGNALING	0.0599365	0.0372876	0.0226489	0.21359	0.286462	0
TCGA	GOBP_REGULATION_OF_PLASMINOGEN_ACTIVATION	0.10266	-0.0139058	0.116566	0.0395063	0.0665873	0
TCGA	GOBP_REGULATION_OF_MACROPHAGE_CHEMOTAXIS	0.129617	-0.054135	0.183752	7.21898e-07	3.62019e-06	0
TCGA	GOBP_POSITIVE_REGULATION_OF_MACROPHAGE_CHEMOTAXIS	0.174434	-0.0658447	0.240278	3.08388e-06	1.39863e-05	0
TCGA	GOBP_FIBROBLAST_MIGRATION	-0.036953	-0.0349588	-0.00199428	0.738525	0.79256	0
TCGA	GOBP_REGULATION_OF_FIBROBLAST_MIGRATION	0.0157262	-0.0334879	0.0492141	0.419679	0.504828	0
TCGA	GOBP_POSITIVE_REGULATION_OF_FIBROBLAST_MIGRATION	-0.0761744	0.0505263	-0.126701	0.00119576	0.0029806	0
TCGA	GOBP_POSITIVE_REGULATION_OF_SODIUM_ION_TRANSPORT	-0.130353	0.0642973	-0.19465	1.21729e-11	1.25309e-10	0
TCGA	GOBP_NEGATIVE_REGULATION_OF_SODIUM_ION_TRANSPORT	-0.0982324	0.052665	-0.150897	3.55446e-07	1.90485e-06	0
TCGA	GOBP_REGULATION_OF_CELL_MORPHOGENESIS_INVOLVED_IN_DIFFERENTIATION	-0.0475766	-0.0112528	-0.0363237	0.417475	0.502415	0
TCGA	GOBP_POSITIVE_REGULATION_OF_CELL_MORPHOGENESIS_INVOLVED_IN_DIFFERENTIATION	-0.0445438	-0.00339437	-0.0411494	0.0557119	0.0900152	0
TCGA	GOBP_NEGATIVE_REGULATION_OF_CELL_MORPHOGENESIS_INVOLVED_IN_DIFFERENTIATION	0.0120105	-0.0483257	0.0603362	0.223994	0.298052	0
TCGA	GOBP_REGULATION_OF_PEPTIDYL_THREONINE_PHOSPHORYLATION	-0.0453439	-0.00230294	-0.043041	0.027559	0.0483951	0
TCGA	GOBP_POSITIVE_REGULATION_OF_PEPTIDYL_THREONINE_PHOSPHORYLATION	0.0194759	-0.0236682	0.0431441	0.785234	0.830913	0
TCGA	GOBP_NEGATIVE_REGULATION_OF_PEPTIDYL_THREONINE_PHOSPHORYLATION	-0.0947774	0.00119074	-0.0959681	0.00130887	0.00324026	0
TCGA	GOBP_FATTY_ACID_METABOLIC_PROCESS	-0.0569901	0.0150518	-0.0720419	0.000368429	0.0010528	1
TCGA	GOBP_FATTY_ACID_TRANSMEMBRANE_TRANSPORT	-0.0484059	0.00792467	-0.0563306	0.00898814	0.0180011	1
TCGA	GOBP_REGULATION_OF_CELL_SUBSTRATE_ADHESION	-0.0146694	-0.00848994	-0.00617944	0.499196	0.57973	0
TCGA	GOBP_POSITIVE_REGULATION_OF_CELL_SUBSTRATE_ADHESION	0.0321219	-0.00795231	0.0400742	0.676577	0.740485	0
TCGA	GOBP_NEGATIVE_REGULATION_OF_CELL_SUBSTRATE_ADHESION	-0.0679423	-0.0229106	-0.0450317	0.174547	0.240976	0
TCGA	GOBP_FATTY_ACID_TRANSPORT	-0.0325222	0.030278	-0.0628002	8.18926e-06	3.40381e-05	1
TCGA	GOBP_REGULATION_OF_T_CELL_CHEMOTAXIS	0.241304	-0.117102	0.358406	1.94477e-16	3.73853e-15	0
TCGA	GOBP_REGULATION_OF_MITOCHONDRION_ORGANIZATION	-0.0186511	-0.0309795	0.0123284	0.858975	0.888927	0
TCGA	GOBP_POSITIVE_REGULATION_OF_MITOCHONDRION_ORGANIZATION	0.00969997	-0.0327858	0.0424858	0.141356	0.201795	0
TCGA	GOBP_NEGATIVE_REGULATION_OF_MITOCHONDRION_ORGANIZATION	-0.0296896	-0.018386	-0.0113037	0.11065	0.162814	0
TCGA	GOBP_NEGATIVE_REGULATION_OF_CENTROSOME_DUPLICATION	0.0176482	-0.0773048	0.094953	0.00588241	0.012377	0
TCGA	GOBP_FATTY_ACYL_COA_BIOSYNTHETIC_PROCESS	-0.078035	-0.00919071	-0.0688443	0.0115901	0.022545	1
TCGA	GOBP_FATTY_ACYL_COA_METABOLIC_PROCESS	-0.0957421	-0.0150298	-0.0807124	0.00293402	0.0066563	1
TCGA	GOBP_NEGATIVE_REGULATION_OF_GLUCOSE_TRANSMEMBRANE_TRANSPORT	0.0623785	-0.0403374	0.102716	0.00311285	0.00700874	0
TCGA	GOBP_REGULATION_OF_MYOTUBE_DIFFERENTIATION	-0.00696431	0.0474704	-0.0544347	0.339838	0.423026	0
TCGA	GOBP_POSITIVE_REGULATION_OF_MYOTUBE_DIFFERENTIATION	0.0519595	0.0342802	0.0176793	0.67868	0.741827	0
TCGA	GOBP_NEGATIVE_REGULATION_OF_MYOTUBE_DIFFERENTIATION	-0.00892377	0.0643815	-0.0733053	0.0649974	0.102761	0
TCGA	GOBP_TELOMERE_MAINTENANCE_VIA_TELOMERE_LENGTHENING	-0.0418829	-0.0769004	0.0350175	0.232499	0.307034	0
TCGA	GOBP_REGULATION_OF_KERATINOCYTE_PROLIFERATION	-0.0396778	0.00588231	-0.0455601	0.0310389	0.0536155	0
TCGA	GOBP_POSITIVE_REGULATION_OF_KERATINOCYTE_PROLIFERATION	0.133129	0.0314846	0.101644	0.0767927	0.118927	0
TCGA	GOBP_NEGATIVE_REGULATION_OF_KERATINOCYTE_PROLIFERATION	-0.144629	0.0254153	-0.170045	0.000239877	0.000720768	0
TCGA	GOBP_RETINA_LAYER_FORMATION	-0.0923717	0.113973	-0.206345	2.65047e-14	3.79975e-13	0
TCGA	GOBP_REGULATION_OF_CHROMATIN_ASSEMBLY	0.0201609	0.0126201	0.00754073	0.626215	0.695566	0
TCGA	GOBP_POSITIVE_REGULATION_OF_PATHWAY_RESTRICTED_SMAD_PROTEIN_PHOSPHORYLATION	-0.0688691	0.0584902	-0.127359	5.00496e-06	2.1691e-05	0
TCGA	GOBP_REGULATION_OF_TRIGLYCERIDE_BIOSYNTHETIC_PROCESS	-0.0514388	0.00643325	-0.0578721	0.0223173	0.040206	0
TCGA	GOBP_POSITIVE_REGULATION_OF_TRIGLYCERIDE_BIOSYNTHETIC_PROCESS	-0.0950146	-0.0136731	-0.0813416	0.0427333	0.0713862	0
TCGA	GOBP_REGULATION_OF_CHOLESTEROL_ESTERIFICATION	0.162414	-0.02169	0.184104	0.00010877	0.000354988	0
TCGA	GOBP_REGULATION_OF_CHOLESTEROL_EFFLUX	-0.010815	-0.00235136	-0.00846366	0.129575	0.186393	0
TCGA	GOBP_POSITIVE_REGULATION_OF_CHOLESTEROL_EFFLUX	0.0192345	0.00369514	0.0155394	0.593345	0.666053	0
TCGA	GOBP_LIPID_LOCALIZATION	-0.020659	0.0252099	-0.0458689	0.0196578	0.03612	0
TCGA	GOBP_CHOLESTEROL_STORAGE	0.0449642	-0.0377531	0.0827173	0.0260451	0.0460073	0
TCGA	GOBP_REGULATION_OF_CARDIAC_MUSCLE_CONTRACTION_BY_REGULATION_OF_THE_RELEASE_OF_SEQUESTERED_CALCIUM_ION	-0.00935259	-0.0204642	0.0111116	0.506523	0.587433	0
TCGA	GOBP_REGULATION_OF_CARDIAC_MUSCLE_CONTRACTION_BY_CALCIUM_ION_SIGNALING	-0.0225758	0.00378492	-0.0263608	0.359074	0.443275	0
TCGA	GOBP_REGULATION_OF_LIPID_STORAGE	0.0111749	-0.023013	0.034188	0.231377	0.305871	0
TCGA	GOBP_POSITIVE_REGULATION_OF_LIPID_STORAGE	0.0231885	0.00998292	0.0132056	0.791131	0.835934	0
TCGA	GOBP_NEGATIVE_REGULATION_OF_LIPID_STORAGE	0.0882882	-0.0449435	0.133232	0.00116403	0.00291006	0
TCGA	GOBP_REGULATION_OF_SEQUESTERING_OF_TRIGLYCERIDE	-0.0575659	0.00376297	-0.0613289	0.045763	0.0758235	0
TCGA	GOBP_POSITIVE_REGULATION_OF_STEROID_BIOSYNTHETIC_PROCESS	0.0579992	0.0223096	0.0356896	0.303387	0.384826	0
TCGA	GOBP_REGULATION_OF_TRIGLYCERIDE_CATABOLIC_PROCESS	0.03154	0.0359429	-0.00440291	0.137256	0.196495	0
TCGA	GOBP_G2_DNA_DAMAGE_CHECKPOINT	0.0898329	-0.0730371	0.16287	5.39621e-05	0.000186424	1
TCGA	GOBP_GAMMA_DELTA_T_CELL_ACTIVATION	0.234915	-0.123585	0.3585	2.67649e-13	3.36217e-12	1
TCGA	GOBP_POSITIVE_REGULATION_OF_MITOCHONDRIAL_MEMBRANE_POTENTIAL	0.0304656	-0.0645321	0.0949978	0.0356393	0.0607148	0
TCGA	GOBP_REGULATION_OF_INOSITOL_PHOSPHATE_BIOSYNTHETIC_PROCESS	0.208452	-0.010866	0.219318	6.50819e-07	3.31951e-06	0
TCGA	GOBP_REGULATION_OF_PHOSPHATASE_ACTIVITY	-0.0134038	-0.00598882	-0.00741494	0.111078	0.163398	0
TCGA	GOBP_POSITIVE_REGULATION_OF_PHOSPHATASE_ACTIVITY	0.121831	-0.0353867	0.157218	3.08531e-05	0.000112972	0
TCGA	GOBP_CELLULAR_COMPONENT_ASSEMBLY_INVOLVED_IN_MORPHOGENESIS	-0.00847388	0.0196844	-0.0281582	0.00465576	0.0100759	0
TCGA	GOBP_MACROPHAGE_CYTOKINE_PRODUCTION	0.16346	-0.0554805	0.21894	2.21746e-05	8.46136e-05	0
TCGA	GOBP_REGULATION_OF_NECROTIC_CELL_DEATH	0.01999	-0.0266202	0.0466102	0.0128469	0.0247243	0
TCGA	GOBP_POSITIVE_REGULATION_OF_NECROTIC_CELL_DEATH	0.0149826	-0.0332447	0.0482273	0.151742	0.214092	0
TCGA	GOBP_NEGATIVE_REGULATION_OF_TRANSCRIPTION_BY_COMPETITIVE_PROMOTER_BINDING	0.00311186	-0.0418305	0.0449424	0.0519035	0.084725	0
TCGA	GOBP_NEGATIVE_REGULATION_OF_CELL_CYCLE_PROCESS	0.0816068	-0.0782958	0.159903	3.7574e-07	1.99883e-06	0
TCGA	GOBP_POSITIVE_REGULATION_OF_PEPTIDASE_ACTIVITY	0.10009	-0.0462208	0.146311	1.83279e-11	1.83822e-10	0
TCGA	GOBP_REGULATION_OF_AMINO_ACID_IMPORT_ACROSS_PLASMA_MEMBRANE	6.95188e-05	-0.00938677	0.00945629	0.363609	0.448218	0
TCGA	GOBP_REGULATION_OF_METAL_ION_TRANSPORT	0.0686085	-0.0232992	0.0919077	0.000511693	0.00140827	0
TCGA	GOBP_MAGNESIUM_ION_HOMEOSTASIS	-0.0529871	0.0916109	-0.144598	0.00220061	0.00516802	0
TCGA	GOBP_REGULATION_OF_GLUCAN_BIOSYNTHETIC_PROCESS	-0.100848	-0.0124625	-0.0883851	3.46575e-07	1.86321e-06	0
TCGA	GOBP_TRANSPORT_ALONG_MICROTUBULE	-0.12753	-0.0191756	-0.108354	3.13165e-08	1.98913e-07	0
TCGA	GOBP_REGULATION_OF_NEURON_PROJECTION_DEVELOPMENT	-0.0356027	0.00422151	-0.0398242	0.000819246	0.00213214	0
TCGA	GOBP_POSITIVE_REGULATION_OF_NEURON_PROJECTION_DEVELOPMENT	-0.0240779	-0.00408345	-0.0199945	0.0468124	0.0772594	0
TCGA	GOBP_NEGATIVE_REGULATION_OF_NEURON_PROJECTION_DEVELOPMENT	-0.0287738	0.000112923	-0.0288867	0.0104725	0.020616	0
TCGA	GOBP_REGULATION_OF_LIPOPROTEIN_PARTICLE_CLEARANCE	0.0917224	0.00548094	0.0862414	0.0310389	0.0536155	0
TCGA	GOBP_REGULATION_OF_LOW_DENSITY_LIPOPROTEIN_PARTICLE_CLEARANCE	0.0620455	-0.0233482	0.0853936	0.0849477	0.129774	0
TCGA	GOBP_UBIQUITIN_RECYCLING	0.0219226	-0.0513312	0.0732539	0.197477	0.267896	0
TCGA	GOBP_RESPONSE_TO_AUDITORY_STIMULUS	0.0598204	0.0296966	0.0301239	0.142135	0.202622	0
TCGA	GOBP_REGULATION_OF_TRANSLATIONAL_INITIATION_BY_EIF2_ALPHA_PHOSPHORYLATION	0.0165298	-0.0141439	0.0306737	0.814093	0.853267	0
TCGA	GOBP_ASTROCYTE_DEVELOPMENT	0.0772447	-0.0393018	0.116546	0.00381397	0.00841562	0
TCGA	GOBP_OLIGODENDROCYTE_DEVELOPMENT	-0.0397383	0.0202054	-0.0599437	2.21052e-06	1.02545e-05	0
TCGA	GOBP_GLIAL_CELL_PROLIFERATION	0.049101	-0.00822544	0.0573265	0.0815383	0.125244	0
TCGA	GOBP_REGULATION_OF_GLIOGENESIS	0.0324116	0.00888222	0.0235294	0.352587	0.436222	0
TCGA	GOBP_NEGATIVE_REGULATION_OF_GLIOGENESIS	-0.0675247	0.0686119	-0.136137	4.88711e-08	3.02096e-07	0
TCGA	GOBP_POSITIVE_REGULATION_OF_GLIOGENESIS	0.0628996	-0.0183631	0.0812627	0.00149963	0.00366599	0
TCGA	GOBP_PRIMARY_NEURAL_TUBE_FORMATION	-0.112262	0.0107826	-0.123044	2.6281e-08	1.6883e-07	0
TCGA	GOBP_NEURAL_CREST_FORMATION	-0.042197	-0.00649885	-0.0356982	0.0360618	0.0613317	0
TCGA	GOBP_NEURAL_CREST_CELL_DIFFERENTIATION	-0.0595534	0.0573521	-0.116905	6.78242e-06	2.8684e-05	0
TCGA	GOBP_SCHWANN_CELL_DIFFERENTIATION	-0.0784968	0.0233671	-0.101864	0.00142233	0.00349217	0
TCGA	GOBP_REGULATION_OF_NEURON_MATURATION	-0.0219842	0.0293745	-0.0513586	0.0619926	0.0986246	0
TCGA	GOBP_SCHWANN_CELL_DEVELOPMENT	-0.0915684	0.0611154	-0.152684	8.91363e-06	3.66883e-05	0
TCGA	GOBP_DOPAMINE_SECRETION	0.0269895	0.101705	-0.0747155	0.00752102	0.0154219	0
TCGA	GOBP_GLUTAMATE_SECRETION	-0.0493476	0.0690341	-0.118382	1.33581e-08	9.01496e-08	0
TCGA	GOBP_REGULATION_OF_GLUTAMATE_SECRETION	0.0552851	0.0772197	-0.0219346	0.159266	0.22285	0
TCGA	GOBP_PHOSPHATIDYLINOSITOL_3_KINASE_SIGNALING	0.041062	-0.033589	0.074651	0.0995573	0.148735	0
TCGA	GOBP_REGULATION_OF_PHOSPHATIDYLINOSITOL_3_KINASE_SIGNALING	0.0580023	-0.0393331	0.0973354	0.0185782	0.0343227	0
TCGA	GOBP_NEGATIVE_REGULATION_OF_PHOSPHATIDYLINOSITOL_3_KINASE_SIGNALING	0.00480861	-0.0311225	0.0359311	0.111724	0.164205	0
TCGA	GOBP_POSITIVE_REGULATION_OF_PHOSPHATIDYLINOSITOL_3_KINASE_SIGNALING	0.0720324	-0.0476067	0.119639	0.016061	0.0301663	0
TCGA	GOBP_RESPONSE_TO_ISOQUINOLINE_ALKALOID	0.0508404	0.0200489	0.0307914	0.0383283	0.0647956	0
TCGA	GOBP_RESPONSE_TO_PURINE_CONTAINING_COMPOUND	0.0149489	0.00906366	0.00588528	0.87782	0.904923	0
TCGA	GOBP_RESPONSE_TO_AMINE	0.066667	0.00769082	0.0589761	0.101942	0.151629	0
TCGA	GOBP_REGULATION_OF_SKELETAL_MUSCLE_ADAPTATION	-0.0776258	0.0657549	-0.143381	0.000155557	0.000490648	0
TCGA	GOBP_NEGATIVE_REGULATION_OF_MUSCLE_HYPERTROPHY	-0.0559776	0.0216996	-0.0776772	0.249797	0.326227	0
TCGA	GOBP_POSITIVE_REGULATION_OF_MUSCLE_HYPERTROPHY	-0.0613426	0.0475346	-0.108877	0.0019728	0.00467847	0
TCGA	GOBP_REGULATION_OF_MUSCLE_HYPERTROPHY	-0.040865	0.0313948	-0.0722599	0.00769458	0.0157269	0
TCGA	GOBP_NEGATIVE_REGULATION_OF_MUSCLE_ADAPTATION	-0.0976156	0.0257063	-0.123322	0.00381397	0.00841562	0
TCGA	GOBP_MUSCLE_CELL_MIGRATION	-0.0409679	-0.0270699	-0.013898	0.192854	0.262255	0
TCGA	GOBP_REGULATION_OF_SKELETAL_MUSCLE_CONTRACTION	0.0142627	0.0202758	-0.00601315	0.809635	0.850352	0
TCGA	GOBP_TONIC_SMOOTH_MUSCLE_CONTRACTION	0.0296904	-0.0164779	0.0461682	0.824517	0.861701	0
TCGA	GOBP_PHASIC_SMOOTH_MUSCLE_CONTRACTION	0.0778897	0.058229	0.0196607	0.902042	0.924634	0
TCGA	GOBP_RESPONSE_TO_ACTIVITY	0.0175272	0.0111754	0.00635187	0.803702	0.846299	0
TCGA	GOBP_VASCULAR_ASSOCIATED_SMOOTH_MUSCLE_CONTRACTION	-0.0243035	0.0244639	-0.0487674	0.201504	0.272412	0
TCGA	GOBP_GASTRO_INTESTINAL_SYSTEM_SMOOTH_MUSCLE_CONTRACTION	0.201284	0.0338002	0.167484	0.00224323	0.00525353	0
TCGA	GOBP_RESPONSE_TO_MUSCLE_ACTIVITY	-0.0185745	0.0525241	-0.0710986	0.0395982	0.0666979	0
TCGA	GOBP_RESPONSE_TO_INACTIVITY	0.0280205	0.0253585	0.00266192	0.600655	0.672326	0
TCGA	GOBP_STRIATED_MUSCLE_CELL_PROLIFERATION	-0.0660727	0.029105	-0.0951778	0.000547522	0.00149391	0
TCGA	GOBP_SKELETAL_MUSCLE_CELL_PROLIFERATION	-0.00585755	0.0287928	-0.0346504	0.233625	0.308121	0
TCGA	GOBP_REGULATION_OF_SKELETAL_MUSCLE_CELL_PROLIFERATION	-0.00192875	0.0275334	-0.0294622	0.4576	0.542092	0
TCGA	GOBP_RESPONSE_TO_MUSCLE_INACTIVITY	0.0287003	0.0515659	-0.0228656	0.991211	0.992776	0
TCGA	GOBP_RESPONSE_TO_STIMULUS_INVOLVED_IN_REGULATION_OF_MUSCLE_ADAPTATION	0.0398566	0.0620059	-0.0221492	0.0215973	0.0391592	0
TCGA	GOBP_STRIATED_MUSCLE_ADAPTATION	-0.0334376	0.0575796	-0.0910172	0.00127864	0.00316695	0
TCGA	GOBP_MUSCLE_ATROPHY	0.0496349	-0.00194387	0.0515787	0.0926686	0.139885	0
TCGA	GOBP_MUSCLE_HYPERTROPHY	-0.0448467	0.0402943	-0.085141	0.00312253	0.00702742	0
TCGA	GOBP_MYOTUBE_DIFFERENTIATION	-0.00293216	0.0155837	-0.0185158	0.264268	0.341958	0
TCGA	GOBP_MYOTUBE_CELL_DEVELOPMENT	0.0972401	0.00819712	0.089043	0.0133394	0.0255463	0
TCGA	GOBP_SMOOTH_MUSCLE_CELL_MIGRATION	-0.0442853	-0.0162557	-0.0280296	0.094921	0.14286	0
TCGA	GOBP_POSITIVE_REGULATION_OF_SMOOTH_MUSCLE_CELL_MIGRATION	-0.0280481	-0.0390991	0.011051	0.779349	0.826582	0
TCGA	GOBP_NEGATIVE_REGULATION_OF_SMOOTH_MUSCLE_CELL_MIGRATION	-0.0486346	0.020721	-0.0693556	0.0154398	0.029129	0
TCGA	GOBP_HEPARAN_SULFATE_PROTEOGLYCAN_BIOSYNTHETIC_PROCESS	-0.145717	0.0265112	-0.172228	9.4992e-07	4.66684e-06	0
TCGA	GOBP_DNA_INTEGRATION	-0.178639	-0.0381469	-0.140492	0.0349721	0.0596984	0
TCGA	GOBP_GAS_TRANSPORT	0.0279728	0.0797565	-0.0517836	0.0704699	0.110042	0
TCGA	GOBP_OXYGEN_TRANSPORT	0.0374304	0.050936	-0.0135056	0.549088	0.626066	0
TCGA	GOBP_MAGNESIUM_ION_TRANSPORT	-0.109732	0.0255399	-0.135272	0.000249032	0.000745626	0
TCGA	GOBP_ORGANIC_CATION_TRANSPORT	-0.0415344	0.0251888	-0.0667232	0.00136225	0.00336091	0
TCGA	GOBP_AMMONIUM_TRANSPORT	-0.0438714	0.0283442	-0.0722156	0.000883752	0.00227667	0
TCGA	GOBP_QUATERNARY_AMMONIUM_GROUP_TRANSPORT	0.00272822	-0.00805438	0.0107826	0.791131	0.835934	0
TCGA	GOBP_INORGANIC_ANION_TRANSPORT	-0.0154953	0.0338235	-0.0493188	2.53391e-06	1.16166e-05	0
TCGA	GOBP_BICARBONATE_TRANSPORT	-0.0802362	0.0517947	-0.132031	3.57199e-05	0.000129024	0
TCGA	GOBP_ORGANIC_ANION_TRANSPORT	-0.0334877	0.0386382	-0.0721259	1.66261e-05	6.56122e-05	0
TCGA	GOBP_MONOCARBOXYLIC_ACID_TRANSPORT	-0.028081	0.0490599	-0.0771409	1.30299e-05	5.22741e-05	0
TCGA	GOBP_BILE_ACID_AND_BILE_SALT_TRANSPORT	-0.0720403	0.0532505	-0.125291	0.000777799	0.00203471	0
TCGA	GOBP_PROSTAGLANDIN_TRANSPORT	-0.039207	0.0722128	-0.11142	0.00035782	0.00102828	0
TCGA	GOBP_C4_DICARBOXYLATE_TRANSPORT	0.0149504	-0.0159372	0.0308876	0.360582	0.444919	0
TCGA	GOBP_ORGANOPHOSPHATE_ESTER_TRANSPORT	-0.00304454	0.000100661	-0.0031452	0.200155	0.270949	0
TCGA	GOBP_NUCLEOTIDE_SUGAR_TRANSMEMBRANE_TRANSPORT	0.016079	-0.0674074	0.0834864	0.435861	0.520347	0
TCGA	GOBP_POLYOL_TRANSPORT	-0.0676875	0.0757169	-0.143404	2.46651e-05	9.27914e-05	0
TCGA	GOBP_GLUCOSE_6_PHOSPHATE_METABOLIC_PROCESS	0.0377674	-0.0465835	0.0843508	0.291837	0.372784	1
TCGA	GOBP_AROMATIC_AMINO_ACID_TRANSPORT	-0.0129276	0.0147123	-0.0276399	0.335014	0.417943	0
TCGA	GOBP_GLUCOSE_CATABOLIC_PROCESS	-0.0216069	-0.00799826	-0.0136087	0.508978	0.589471	1
TCGA	GOBP_GLUCOSE_IMPORT	-0.0794465	0.0167958	-0.0962422	3.87904e-09	2.86552e-08	1
TCGA	GOBP_GLUCOSE_METABOLIC_PROCESS	-0.0547927	0.00661904	-0.0614117	3.73943e-05	0.000134118	1
TCGA	GOBP_L_ALANINE_TRANSPORT	0.0276268	-0.0399197	0.0675465	0.615396	0.686252	0
TCGA	GOBP_ARGININE_TRANSPORT	-0.0869141	0.0327096	-0.119624	0.000174528	0.000545066	0
TCGA	GOBP_GAMMA_AMINOBUTYRIC_ACID_TRANSPORT	0.0781067	0.0461979	0.0319089	0.70909	0.76861	0
TCGA	GOBP_L_GLUTAMATE_TRANSMEMBRANE_TRANSPORT	0.0265745	-0.00731234	0.0338868	0.078403	0.121014	0
TCGA	GOBP_GLYCINE_TRANSPORT	0.0677232	0.0343654	0.0333578	0.292714	0.373811	0
TCGA	GOBP_PROLINE_TRANSPORT	0.0701631	0.0384637	0.0316993	0.221812	0.295847	0
TCGA	GOBP_AMINE_TRANSPORT	0.0131088	0.0772693	-0.0641605	0.0219825	0.0397297	0
TCGA	GOBP_MONOAMINE_TRANSPORT	0.0340113	0.0596057	-0.0255944	0.510208	0.590626	0
TCGA	GOBP_ORGANIC_ACID_TRANSPORT	-0.0329291	0.029608	-0.0625371	5.28713e-05	0.000183155	0
TCGA	GOBP_ORGANIC_HYDROXY_COMPOUND_TRANSPORT	0.0084825	0.0460482	-0.0375657	0.0189159	0.0348958	0
TCGA	GOBP_PURINE_NUCLEOTIDE_TRANSPORT	-0.0763918	0.0244579	-0.10085	7.32644e-07	3.67045e-06	0
TCGA	GOBP_ATP_TRANSPORT	-0.0822847	0.0288808	-0.111166	3.70845e-05	0.000133194	0
TCGA	GOBP_DOPAMINE_TRANSPORT	0.0263226	0.0948587	-0.0685361	0.0011798	0.00294514	0
TCGA	GOBP_NOREPINEPHRINE_TRANSPORT	0.0569693	0.0687976	-0.0118283	0.485311	0.567501	0
TCGA	GOBP_HEME_TRANSPORT	-0.140302	0.0292777	-0.16958	2.08864e-05	8.01805e-05	0
TCGA	GOBP_DRUG_TRANSPORT	-0.165063	0.0853412	-0.250405	1.74917e-09	1.3678e-08	0
TCGA	GOBP_GLUTAMINE_FAMILY_AMINO_ACID_BIOSYNTHETIC_PROCESS	-0.157162	0.0101374	-0.1673	5.43285e-06	2.33461e-05	1
TCGA	GOBP_GLUTAMINE_FAMILY_AMINO_ACID_CATABOLIC_PROCESS	-0.122734	0.029905	-0.152639	6.87165e-07	3.46312e-06	1
TCGA	GOBP_LONG_CHAIN_FATTY_ACID_IMPORT_ACROSS_PLASMA_MEMBRANE	-0.13884	0.011814	-0.150654	4.78152e-07	2.49909e-06	0
TCGA	GOBP_PHOSPHOLIPID_TRANSPORT	0.0160263	0.0115942	0.00443208	0.91115	0.9319	0
TCGA	GOBP_STEROL_TRANSPORT	-0.0116556	0.00552124	-0.0171768	0.412541	0.498012	0
TCGA	GOBP_PEROXISOMAL_MEMBRANE_TRANSPORT	-0.0388846	-0.070093	0.0312085	0.625537	0.695117	0
TCGA	GOBP_NUCLEOBASE_CONTAINING_COMPOUND_TRANSPORT	-0.0394251	-0.042677	0.00325185	0.764692	0.8141	0
TCGA	GOBP_COENZYME_A_METABOLIC_PROCESS	-0.0914628	-0.0325228	-0.05894	0.137003	0.196188	0
TCGA	GOBP_COENZYME_A_BIOSYNTHETIC_PROCESS	-0.0625759	-0.0635429	0.000966932	0.783761	0.830048	0
TCGA	GOBP_NUCLEOBASE_CONTAINING_SMALL_MOLECULE_INTERCONVERSION	-0.053156	-0.0327515	-0.0204045	0.605997	0.677558	0
TCGA	GOBP_ENERGY_DERIVATION_BY_OXIDATION_OF_ORGANIC_COMPOUNDS	-0.0635356	-0.0533022	-0.0102334	0.855215	0.88612	0
TCGA	GOBP_ATP_SYNTHESIS_COUPLED_PROTON_TRANSPORT	-0.0045368	-0.123124	0.118588	0.0649974	0.102761	0
TCGA	GOBP_CDP_DIACYLGLYCEROL_BIOSYNTHETIC_PROCESS	-0.137679	-0.00090725	-0.136772	6.40044e-05	0.000217855	0
TCGA	GOBP_LIPID_CATABOLIC_PROCESS	0.00630318	0.0145531	-0.00824993	0.148755	0.210758	0
TCGA	GOBP_DETECTION_OF_TEMPERATURE_STIMULUS	0.117256	0.0497679	0.0674878	0.218927	0.292383	0
TCGA	GOBP_CELL_GROWTH	-0.0262229	-0.00756097	-0.018662	0.0049717	0.0106642	0
TCGA	GOBP_VESICLE_ORGANIZATION	-0.0340313	-0.0243134	-0.00971793	0.707665	0.767229	0
TCGA	GOBP_CARBOHYDRATE_BIOSYNTHETIC_PROCESS	-0.0315504	0.00218727	-0.0337377	0.00138048	0.00339928	0
TCGA	GOBP_CARBOHYDRATE_CATABOLIC_PROCESS	0.00991194	-0.0194532	0.0293652	0.1627	0.226965	0
TCGA	GOBP_ORGANIC_ACID_BIOSYNTHETIC_PROCESS	-0.0554559	0.0147558	-0.0702117	0.00157042	0.00381333	0
TCGA	GOBP_ORGANIC_ACID_CATABOLIC_PROCESS	-0.1028	-0.00138578	-0.101414	0.00510644	0.0109393	0
TCGA	GOBP_RHODOPSIN_MEDIATED_SIGNALING_PATHWAY	-0.00123264	0.00235631	-0.00358895	0.804443	0.846299	0
TCGA	GOBP_RRNA_METABOLIC_PROCESS	0.015415	-0.0633333	0.0787484	0.094921	0.14286	0
TCGA	GOBP_SNRNA_METABOLIC_PROCESS	0.00497656	-0.0415796	0.0465561	0.184797	0.252857	0
TCGA	GOBP_SNO_S_RNA_METABOLIC_PROCESS	-0.0157565	-0.0564025	0.040646	0.474593	0.55715	0
TCGA	GOBP_RRNA_CATABOLIC_PROCESS	0.128039	-0.0662954	0.194335	6.34885e-05	0.000216535	0
TCGA	GOBP_SYNAPTIC_VESICLE_EXOCYTOSIS	-0.0148747	0.0248387	-0.0397135	0.00220061	0.00516802	0
TCGA	GOBP_SYNAPTIC_VESICLE_DOCKING	-0.0471084	0.00852571	-0.0556341	0.00340502	0.00760249	0
TCGA	GOBP_SYNAPTIC_VESICLE_PRIMING	-0.0335117	0.0264794	-0.0599911	0.0633439	0.100491	0
TCGA	GOBP_TERPENOID_BIOSYNTHETIC_PROCESS	0.0395806	0.0395315	4.911e-05	0.621472	0.691963	0
TCGA	GOBP_STEROL_METABOLIC_PROCESS	-0.0478166	0.00703293	-0.0548495	0.000939999	0.00240448	0
TCGA	GOBP_STEROL_BIOSYNTHETIC_PROCESS	-0.0820632	-0.0122081	-0.0698551	0.00221473	0.00519638	0
TCGA	GOBP_GLYCOSIDE_METABOLIC_PROCESS	0.0814159	-0.0166734	0.0980893	0.0340721	0.058378	0
TCGA	GOBP_SNRNA_PROCESSING	0.0334723	-0.0376036	0.0710759	0.306548	0.388156	0
TCGA	GOBP_SYNAPTIC_VESICLE_MATURATION	-0.212085	0.0448078	-0.256893	5.06932e-12	5.45059e-11	0
TCGA	GOBP_ENDOSOMAL_TRANSPORT	-0.0585054	-0.029613	-0.0288924	0.0676882	0.106385	0
TCGA	GOBP_IRON_SULFUR_CLUSTER_ASSEMBLY	-0.0785467	-0.0715021	-0.00704463	0.777145	0.825107	0
TCGA	GOBP_TELOMERE_CAPPING	-0.0376051	-0.0509592	0.013354	0.316161	0.398143	0
TCGA	GOBP_MACROAUTOPHAGY	-0.0504736	-0.0444704	-0.00600323	0.757395	0.808026	0
TCGA	GOBP_POSITIVE_REGULATION_OF_MACROAUTOPHAGY	-0.0104312	-0.0385472	0.028116	0.849957	0.882113	0
TCGA	GOBP_REGULATION_OF_MACROAUTOPHAGY	-0.0406474	-0.0510353	0.0103879	0.948449	0.961138	0
TCGA	GOBP_NEGATIVE_REGULATION_OF_MACROAUTOPHAGY	-0.0655129	-0.042894	-0.0226189	0.11655	0.170508	0
TCGA	GOBP_RNA_INTERFERENCE	-0.0849674	-0.0806847	-0.00428271	0.9515	0.962884	0
TCGA	GOBP_PREASSEMBLY_OF_GPI_ANCHOR_IN_ER_MEMBRANE	-0.177212	-0.0210034	-0.156208	0.000862734	0.00223386	0
TCGA	GOBP_GAP_JUNCTION_ASSEMBLY	0.0511339	0.057645	-0.00651106	0.351596	0.435207	0
TCGA	GOBP_O_GLYCAN_PROCESSING	-0.0826561	0.0263443	-0.109	3.78638e-05	0.000135418	0
TCGA	GOBP_DEPHOSPHORYLATION	-0.0269708	-0.00946207	-0.0175088	0.148486	0.210435	0
TCGA	GOBP_NEURON_REMODELING	-0.0252252	0.039914	-0.0651392	0.425218	0.510282	0
TCGA	GOBP_MORPHOGENESIS_OF_EMBRYONIC_EPITHELIUM	-0.101502	0.0228859	-0.124388	3.19769e-13	3.96779e-12	0
TCGA	GOBP_CALCIUM_INDEPENDENT_CELL_CELL_ADHESION_VIA_PLASMA_MEMBRANE_CELL_ADHESION_MOLECULES	0.000271712	0.0815323	-0.0812606	0.000134307	0.000430309	0
TCGA	GOBP_CALCIUM_DEPENDENT_CELL_CELL_ADHESION_VIA_PLASMA_MEMBRANE_CELL_ADHESION_MOLECULES	-0.0478706	0.0857842	-0.133655	0.0199107	0.036479	0
TCGA	GOBP_DENDRITE_DEVELOPMENT	-0.0435312	0.00221206	-0.0457433	2.70749e-05	0.000100737	0
TCGA	GOBP_SOMATIC_DIVERSIFICATION_OF_IMMUNOGLOBULINS	0.099285	-0.103017	0.202302	1.6793e-15	2.81268e-14	0
TCGA	GOBP_SOMATIC_RECOMBINATION_OF_IMMUNOGLOBULIN_GENE_SEGMENTS	0.0920452	-0.0925564	0.184602	6.047e-14	8.33928e-13	0
TCGA	GOBP_GENE_SILENCING	-0.0473944	-0.0358654	-0.011529	0.584101	0.657713	0
TCGA	GOBP_CYTOSOLIC_TRANSPORT	-0.0853546	-0.00898517	-0.0763694	0.000738306	0.00194241	0
TCGA	GOBP_PROTEIN_PROCESSING	0.0392855	0.0125651	0.0267204	0.0242997	0.0432705	0
TCGA	GOBP_PROTEIN_AUTOPROCESSING	0.0725559	-0.00990695	0.0824629	0.00195377	0.00464204	0
TCGA	GOBP_BASE_CONVERSION_OR_SUBSTITUTION_EDITING	0.255011	-0.0314461	0.286457	2.8813e-15	4.7018e-14	0
TCGA	GOBP_CYTIDINE_TO_URIDINE_EDITING	0.371686	-0.06962	0.441306	2.84981e-20	1.01851e-18	0
TCGA	GOBP_MRNA_MODIFICATION	0.00941978	-0.0732136	0.0826333	0.276338	0.355581	0
TCGA	GOBP_PROTEIN_IMPORT_INTO_PEROXISOME_MATRIX	-0.179579	-0.00076705	-0.178812	8.78644e-05	0.000291446	0
TCGA	GOBP_COVALENT_CHROMATIN_MODIFICATION	-0.0353312	-0.0228167	-0.0125146	0.243159	0.318707	0
TCGA	GOBP_HISTONE_METHYLATION	-0.0532913	-0.0150568	-0.0382345	0.0849477	0.129774	0
TCGA	GOBP_HISTONE_PHOSPHORYLATION	0.125516	-0.0985805	0.224097	2.65647e-09	2.00619e-08	0
TCGA	GOBP_HISTONE_UBIQUITINATION	-0.0694568	-0.0586521	-0.0108047	0.908113	0.929918	0
TCGA	GOBP_HISTONE_DEACETYLATION	-0.087744	-0.00161372	-0.0861303	0.00100295	0.00255138	0
TCGA	GOBP_HISTONE_DEUBIQUITINATION	-0.0688292	-0.0524563	-0.016373	0.869519	0.897642	0
TCGA	GOBP_RAC_PROTEIN_SIGNAL_TRANSDUCTION	-0.00498387	-0.0396335	0.0346497	0.177916	0.24496	0
TCGA	GOBP_PROTEIN_SUMOYLATION	-0.0207935	-0.0420572	0.0212637	0.594671	0.667099	0
TCGA	GOBP_POLY_A_PLUS_MRNA_EXPORT_FROM_NUCLEUS	-0.0877232	0.0223717	-0.110095	0.00932094	0.0185651	0
TCGA	GOBP_CYTOCHROME_COMPLEX_ASSEMBLY	-0.070822	-0.056647	-0.014175	0.409271	0.494889	0
TCGA	GOBP_PROTEIN_NITROSYLATION	-0.0480454	0.0310861	-0.0791315	0.000508051	0.00140052	0
TCGA	GOBP_PROTEIN_IMPORT	-0.0178586	-0.0329211	0.0150625	0.858223	0.888511	0
TCGA	GOBP_PLASMA_MEMBRANE_PHOSPHOLIPID_SCRAMBLING	0.0984672	0.0136418	0.0848254	0.000252784	0.000755525	0
TCGA	GOBP_DRUG_METABOLIC_PROCESS	-0.024746	0.0714377	-0.0961837	0.0196076	0.0360407	0
TCGA	GOBP_STEM_CELL_DIVISION	-0.0308822	0.00836594	-0.0392482	0.0722747	0.112513	0
TCGA	GOBP_CALCIUM_ION_REGULATED_EXOCYTOSIS	-0.0259519	0.0620632	-0.0880151	2.3538e-07	1.3041e-06	0
TCGA	GOBP_REGULATION_OF_EXOCYTOSIS	0.0362776	0.00439894	0.0318786	0.0600106	0.0958017	0
TCGA	GOBP_REGULATION_OF_CALCIUM_ION_DEPENDENT_EXOCYTOSIS	-0.02538	0.0752841	-0.100664	0.000110927	0.00036133	0
TCGA	GOBP_PEPTIDYL_LYSINE_METHYLATION	-0.0758781	-0.018414	-0.057464	0.0425375	0.071106	0
TCGA	GOBP_PEPTIDYL_LYSINE_TRIMETHYLATION	-0.0513601	-0.00101498	-0.0503452	0.00678266	0.0140843	0
TCGA	GOBP_PEPTIDYL_LYSINE_MONOMETHYLATION	-0.106851	-0.0171499	-0.0897008	0.0130209	0.0250118	0
TCGA	GOBP_PEPTIDYL_LYSINE_DIMETHYLATION	-0.0574828	-0.0347939	-0.022689	0.0558346	0.0901273	0
TCGA	GOBP_PROTEIN_POLYGLUTAMYLATION	-0.0821775	-0.0160699	-0.0661077	0.150379	0.212583	0
TCGA	GOBP_PROTEIN_HYDROXYLATION	-0.0211579	-0.0436966	0.0225387	0.813349	0.852664	0
TCGA	GOBP_KERATAN_SULFATE_BIOSYNTHETIC_PROCESS	-0.0483793	-0.028424	-0.0199552	0.336938	0.419828	0
TCGA	GOBP_PEPTIDE_CROSS_LINKING	0.0791303	0.014582	0.0645483	0.144492	0.205577	0
TCGA	GOBP_PROTEIN_OXIDATION	0.0384851	-0.000732593	0.0392177	0.360582	0.444919	0
TCGA	GOBP_PEPTIDYL_ARGININE_MODIFICATION	0.00854337	-0.00304898	0.0115924	0.961421	0.969829	0
TCGA	GOBP_PEPTIDYL_ASPARAGINE_MODIFICATION	0.00302984	-0.0712529	0.0742827	0.374843	0.458946	0
TCGA	GOBP_PEPTIDYL_CYSTEINE_MODIFICATION	-0.0937201	0.014132	-0.107852	5.83579e-08	3.55969e-07	0
TCGA	GOBP_PEPTIDYL_GLUTAMIC_ACID_MODIFICATION	-0.0560449	0.00214585	-0.0581908	0.0448357	0.0744571	0
TCGA	GOBP_PEPTIDYL_HISTIDINE_MODIFICATION	-0.0877628	-0.0625091	-0.0252537	0.865751	0.89448	0
TCGA	GOBP_PEPTIDYL_LYSINE_MODIFICATION	-0.0689185	-0.0282743	-0.0406442	0.183848	0.251761	0
TCGA	GOBP_PEPTIDYL_METHIONINE_MODIFICATION	-0.0728516	-0.0388825	-0.033969	0.0676882	0.106385	0
TCGA	GOBP_PEPTIDYL_PROLINE_MODIFICATION	0.0314534	-0.0380144	0.0694678	0.0107943	0.0211838	0
TCGA	GOBP_PEPTIDYL_SERINE_MODIFICATION	0.00723853	-0.00811983	0.0153584	0.235511	0.310285	0
TCGA	GOBP_PEPTIDYL_THREONINE_MODIFICATION	-0.0580674	0.00209595	-0.0601633	0.00105182	0.00265968	0
TCGA	GOBP_PEPTIDYL_TYROSINE_MODIFICATION	0.0835548	-0.0198923	0.103447	0.000106234	0.000347831	0
TCGA	GOBP_PROTEIN_PHOSPHOPANTETHEINYLATION	-0.0559955	-0.00710485	-0.0488907	0.000347496	0.00100201	0
TCGA	GOBP_PEPTIDYL_ARGININE_METHYLATION	-0.0215436	-0.0428243	0.0212807	0.808893	0.849924	0
TCGA	GOBP_PEPTIDYL_L_CYSTEINE_S_PALMITOYLATION	-0.118648	0.00574323	-0.124392	7.65749e-06	3.19062e-05	0
TCGA	GOBP_PROTEIN_CHROMOPHORE_LINKAGE	-0.0193189	0.0656341	-0.084953	0.000246251	0.000738173	0
TCGA	GOBP_PROTEIN_PALMITOYLATION	-0.142995	-0.00355758	-0.139437	9.1142e-06	3.74834e-05	0
TCGA	GOBP_PEPTIDYL_LYSINE_ACETYLATION	-0.0739623	-0.0350024	-0.0389599	0.0201664	0.0368676	0
TCGA	GOBP_PEPTIDYL_PROLINE_HYDROXYLATION_TO_4_HYDROXY_L_PROLINE	-0.0966418	-0.00361828	-0.0930236	0.24744	0.323649	0
TCGA	GOBP_C_TERMINAL_PROTEIN_AMINO_ACID_MODIFICATION	0.0560292	-0.0712409	0.12727	0.00253922	0.00587086	0
TCGA	GOBP_ETHER_METABOLIC_PROCESS	-0.0383271	-0.0210664	-0.0172607	0.321742	0.404269	0
TCGA	GOBP_PHENOL_CONTAINING_COMPOUND_METABOLIC_PROCESS	-0.0109898	0.0616855	-0.0726753	0.0124376	0.0240003	0
TCGA	GOBP_VIRAL_LATENCY	0.0897695	-0.0971806	0.18695	0.000615361	0.00165323	0
TCGA	GOBP_MODULATION_BY_VIRUS_OF_HOST_PROCESS	0.0453635	-0.0700647	0.115428	0.000276438	0.000817079	0
TCGA	GOBP_MODULATION_BY_VIRUS_OF_HOST_CELLULAR_PROCESS	0.0552614	-0.119256	0.174518	4.19735e-07	2.2143e-06	0
TCGA	GOBP_VIRAL_LIFE_CYCLE	0.0574783	-0.0527559	0.110234	6.01521e-10	4.99626e-09	0
TCGA	GOBP_VIRION_ATTACHMENT_TO_HOST_CELL	0.099775	0.0216664	0.0781086	0.220006	0.293746	0
TCGA	GOBP_VIRION_ASSEMBLY	-0.0257679	-0.0363348	0.0105669	0.685708	0.747897	0
TCGA	GOBP_VIRAL_RELEASE_FROM_HOST_CELL	-0.065508	-0.044278	-0.02123	0.550366	0.6271	0
TCGA	GOBP_VIRAL_GENOME_REPLICATION	0.0783863	-0.0621176	0.140504	4.27591e-13	5.2039e-12	0
TCGA	GOBP_VIRAL_GENE_EXPRESSION	-0.000836882	-0.0342637	0.0334268	0.245488	0.321261	0
TCGA	GOBP_VIRAL_TRANSLATION	-0.0873691	-0.0954401	0.00807106	0.742142	0.795265	0
TCGA	GOBP_REPRODUCTIVE_BEHAVIOR	-0.0834008	0.0693947	-0.152795	2.76117e-08	1.76264e-07	0
TCGA	GOBP_NONRIBOSOMAL_PEPTIDE_BIOSYNTHETIC_PROCESS	-0.0916966	-0.0165612	-0.0751354	0.199148	0.269874	0
TCGA	GOBP_REGULATION_OF_LIPID_METABOLIC_PROCESS	-0.0433235	0.00576101	-0.0490845	0.00553071	0.0117539	0
TCGA	GOBP_GLUTAMINE_FAMILY_AMINO_ACID_METABOLIC_PROCESS	-0.0750046	0.0164218	-0.0914264	0.000483229	0.0013401	1
TCGA	GOBP_REGULATION_OF_STEROID_METABOLIC_PROCESS	-0.0450508	0.0107185	-0.0557693	0.000120433	0.000390043	0
TCGA	GOBP_TRANSMISSION_OF_NERVE_IMPULSE	0.0200757	0.0932583	-0.0731825	0.00293402	0.0066563	0
TCGA	GOBP_NEURONAL_ACTION_POTENTIAL	-0.043323	0.0854045	-0.128727	1.09382e-06	5.3121e-06	0
TCGA	GOBP_REGULATION_OF_VASOCONSTRICTION	-0.00594887	0.067415	-0.0733638	0.0138856	0.0264724	0
TCGA	GOBP_SENSORY_PERCEPTION_OF_PAIN	0.0487321	0.0352913	0.0134408	0.914948	0.935031	0
TCGA	GOBP_PENTOSE_METABOLIC_PROCESS	-0.052606	-0.0294261	-0.0231799	0.453551	0.5383	0
TCGA	GOBP_PHENOL_CONTAINING_COMPOUND_CATABOLIC_PROCESS	-0.0210046	0.0602532	-0.0812578	0.101942	0.151629	0
TCGA	GOBP_ARACHIDONIC_ACID_METABOLIC_PROCESS	-0.00433353	0.0581046	-0.0624381	0.100943	0.150275	0
TCGA	GOBP_LEUKOTRIENE_BIOSYNTHETIC_PROCESS	-0.0166185	0.0337813	-0.0503998	0.0893707	0.135511	0
TCGA	GOBP_CYCLOOXYGENASE_PATHWAY	0.117925	-0.0179239	0.135849	0.00598654	0.0125648	0
TCGA	GOBP_LIPOXYGENASE_PATHWAY	-0.0346961	0.0766294	-0.111326	0.0425375	0.071106	0
TCGA	GOBP_EPOXYGENASE_P450_PATHWAY	0.0252402	0.0811426	-0.0559024	0.429681	0.514178	0
TCGA	GOBP_GLYCOLIPID_CATABOLIC_PROCESS	0.0925713	-0.0694588	0.16203	0.000165419	0.000519816	0
TCGA	GOBP_ALDITOL_METABOLIC_PROCESS	-0.029233	-0.00764909	-0.0215839	0.677278	0.740613	0
TCGA	GOBP_TRIGLYCERIDE_BIOSYNTHETIC_PROCESS	-0.0860973	0.0345109	-0.120608	2.53013e-05	9.49032e-05	0
TCGA	GOBP_TRIGLYCERIDE_CATABOLIC_PROCESS	-0.00285412	0.073387	-0.0762411	0.00324087	0.00726476	0
TCGA	GOBP_PEPTIDYL_PROLINE_HYDROXYLATION	-0.0405314	-0.0281649	-0.0123665	0.384193	0.468584	0
TCGA	GOBP_OXALATE_TRANSPORT	-0.105827	0.089217	-0.195043	0.000110927	0.00036133	0
TCGA	GOBP_UREA_METABOLIC_PROCESS	-0.0113019	0.0477271	-0.059029	0.022543	0.040555	0
TCGA	GOBP_NAD_METABOLIC_PROCESS	0.0585402	-0.0367212	0.0952613	0.0155623	0.0293274	0
TCGA	GOBP_CALCIUM_MEDIATED_SIGNALING	0.0864951	-0.0400525	0.126548	5.60854e-06	2.404e-05	0
TCGA	GOBP_B_CELL_MEDIATED_IMMUNITY	0.217352	-0.0894512	0.306803	5.97733e-24	4.73984e-22	0
TCGA	GOBP_ANTIMICROBIAL_HUMORAL_RESPONSE	0.177665	0.0475863	0.130079	1.86808e-05	7.29831e-05	0
TCGA	GOBP_ANTIBACTERIAL_HUMORAL_RESPONSE	0.110452	0.066727	0.043725	0.0964469	0.14477	0
TCGA	GOBP_SECONDARY_METABOLIC_PROCESS	0.018993	0.0638106	-0.0448176	0.0219825	0.0397297	0
TCGA	GOBP_POLYOL_METABOLIC_PROCESS	-0.0134176	-0.00425327	-0.00916433	0.780819	0.827795	0
TCGA	GOBP_ONE_CARBON_COMPOUND_TRANSPORT	-0.0449847	0.148414	-0.193399	0.000165419	0.000519816	0
TCGA	GOBP_CYTOLYSIS	0.326505	-0.0169379	0.343443	1.21923e-26	2.81255e-24	0
TCGA	GOBP_L_ASCORBIC_ACID_METABOLIC_PROCESS	0.0065509	-0.0154945	0.0220454	0.878576	0.905334	0
TCGA	GOBP_INSULIN_SECRETION_INVOLVED_IN_CELLULAR_RESPONSE_TO_GLUCOSE_STIMULUS	-0.0752967	0.0216283	-0.0969251	6.29012e-08	3.82304e-07	1
TCGA	GOBP_INTERFERON_ALPHA_PRODUCTION	0.289673	-0.131083	0.420756	5.18044e-17	1.10003e-15	1
TCGA	GOBP_AXONAL_TRANSPORT_OF_MITOCHONDRION	-0.0836649	0.058675	-0.14234	4.56127e-05	0.000160419	0
TCGA	GOBP_LIPID_STORAGE	0.00430041	-0.0441948	0.0484952	0.119934	0.174353	0
TCGA	GOBP_SECOND_MESSENGER_MEDIATED_SIGNALING	0.0572567	-0.00832348	0.0655801	0.0406208	0.068307	0
TCGA	GOBP_CAMP_MEDIATED_SIGNALING	-0.054897	0.0516852	-0.106582	1.32093e-08	8.92639e-08	0
TCGA	GOBP_CGMP_MEDIATED_SIGNALING	0.0752963	0.0668787	0.00841753	0.939301	0.954154	0
TCGA	GOBP_CYCLIC_NUCLEOTIDE_MEDIATED_SIGNALING	-0.0308937	0.0697922	-0.100686	1.72113e-05	6.76061e-05	0
TCGA	GOBP_TRANSLESION_SYNTHESIS	0.0811505	-0.11636	0.19751	1.00711e-06	4.9287e-06	0
TCGA	GOBP_HEMOGLOBIN_METABOLIC_PROCESS	-0.0813577	0.0264304	-0.107788	0.0213259	0.03875	0
TCGA	GOBP_SPINAL_CORD_DEVELOPMENT	-0.0476858	0.0878645	-0.13555	3.23565e-11	3.18853e-10	0
TCGA	GOBP_SPINAL_CORD_PATTERNING	-0.0918632	0.120784	-0.212647	7.17164e-10	5.88934e-09	0
TCGA	GOBP_VENTRAL_SPINAL_CORD_INTERNEURON_DIFFERENTIATION	0.00681767	0.112164	-0.105347	0.00616377	0.0129048	0
TCGA	GOBP_CELL_DIFFERENTIATION_IN_SPINAL_CORD	-0.0111628	0.0906221	-0.101785	1.44694e-05	5.75489e-05	0
TCGA	GOBP_DORSAL_SPINAL_CORD_DEVELOPMENT	0.102084	0.116067	-0.0139823	0.312017	0.393902	0
TCGA	GOBP_VENTRAL_SPINAL_CORD_DEVELOPMENT	-0.0415983	0.098898	-0.140496	1.55341e-08	1.04005e-07	0
TCGA	GOBP_SPINAL_CORD_MOTOR_NEURON_CELL_FATE_SPECIFICATION	-0.0146694	0.0969955	-0.111665	0.0468124	0.0772594	0
TCGA	GOBP_SPINAL_CORD_MOTOR_NEURON_DIFFERENTIATION	-0.0562507	0.0745887	-0.130839	2.49846e-06	1.14644e-05	0
TCGA	GOBP_SPINAL_CORD_ASSOCIATION_NEURON_DIFFERENTIATION	0.141321	0.0810335	0.0602872	0.197145	0.267516	0
TCGA	GOBP_NEURAL_TUBE_PATTERNING	-0.128754	0.0183768	-0.147131	2.30638e-06	1.06505e-05	0
TCGA	GOBP_CELL_DIFFERENTIATION_IN_HINDBRAIN	-0.0434008	0.110841	-0.154242	5.02057e-08	3.09591e-07	0
TCGA	GOBP_CELL_PROLIFERATION_IN_HINDBRAIN	0.0391234	0.0533405	-0.014217	0.440388	0.524763	0
TCGA	GOBP_CELL_MIGRATION_IN_HINDBRAIN	-0.0616069	0.109233	-0.17084	2.29443e-05	8.70271e-05	0
TCGA	GOBP_DIENCEPHALON_DEVELOPMENT	-0.034965	0.104249	-0.139214	9.69293e-09	6.67457e-08	0
TCGA	GOBP_TELENCEPHALON_DEVELOPMENT	-0.0106702	0.0201379	-0.0308081	0.00837784	0.0169798	0
TCGA	GOBP_DENTATE_GYRUS_DEVELOPMENT	-0.0291661	0.0684258	-0.0975919	0.0089379	0.0179288	0
TCGA	GOBP_PALLIUM_DEVELOPMENT	-0.028811	0.0130605	-0.0418715	0.0391406	0.0660807	0
TCGA	GOBP_SUBPALLIUM_DEVELOPMENT	0.0339459	0.046073	-0.012127	0.838712	0.873838	0
TCGA	GOBP_CRANIAL_NERVE_DEVELOPMENT	0.0653778	0.0565975	0.00878034	0.790393	0.835676	0
TCGA	GOBP_OPTIC_NERVE_DEVELOPMENT	0.0691088	-0.0181449	0.0872537	0.0108538	0.0212922	0
TCGA	GOBP_TRIGEMINAL_NERVE_DEVELOPMENT	0.193713	0.0710671	0.122646	0.00837784	0.0169798	0
TCGA	GOBP_HINDBRAIN_MORPHOGENESIS	-0.0503845	0.0557143	-0.106099	7.19109e-06	3.02109e-05	0
TCGA	GOBP_VENTRICULAR_SYSTEM_DEVELOPMENT	-0.0546796	-0.000985358	-0.0536943	0.0271569	0.0478049	0
TCGA	GOBP_CRANIAL_NERVE_MORPHOGENESIS	0.0602579	0.0165949	0.043663	0.120391	0.174917	0
TCGA	GOBP_FACIAL_NERVE_MORPHOGENESIS	0.0342796	0.0106257	0.0236539	0.550366	0.6271	0
TCGA	GOBP_LATERAL_VENTRICLE_DEVELOPMENT	-0.0290257	0.0104229	-0.0394486	0.188311	0.25711	0
TCGA	GOBP_NERVE_DEVELOPMENT	0.04304	0.0355366	0.00750342	0.924073	0.942268	0
TCGA	GOBP_CEREBELLAR_PURKINJE_CELL_LAYER_DEVELOPMENT	-0.0386771	0.0267832	-0.0654603	0.00217261	0.0051141	0
TCGA	GOBP_CEREBELLAR_GRANULAR_LAYER_DEVELOPMENT	-0.0127183	0.0543871	-0.0671053	0.0221493	0.0399317	0
TCGA	GOBP_CEREBELLAR_PURKINJE_CELL_LAYER_MORPHOGENESIS	-0.0353767	0.0602856	-0.0956623	0.0116218	0.0225979	0
TCGA	GOBP_CEREBELLAR_PURKINJE_CELL_LAYER_FORMATION	0.0737545	0.0516499	0.0221046	0.211132	0.283765	0
TCGA	GOBP_CEREBELLAR_CORTEX_DEVELOPMENT	-0.0313336	0.0274787	-0.0588124	0.00478274	0.0103111	0
TCGA	GOBP_CEREBELLAR_CORTEX_MORPHOGENESIS	-0.0445053	0.0442937	-0.0887989	0.0041026	0.0089977	0
TCGA	GOBP_CEREBELLAR_CORTEX_FORMATION	-0.0635251	0.0610729	-0.124598	9.40225e-06	3.85432e-05	0
TCGA	GOBP_DEVELOPMENTAL_MATURATION	0.0012523	0.0141449	-0.0128926	0.351596	0.435207	0
TCGA	GOBP_CEREBELLAR_PURKINJE_CELL_DIFFERENTIATION	-0.00716336	0.079179	-0.0863424	0.0688482	0.108008	0
TCGA	GOBP_STRIATUM_DEVELOPMENT	0.00857529	0.0241942	-0.0156189	0.811121	0.851383	0
TCGA	GOBP_LIMBIC_SYSTEM_DEVELOPMENT	0.023695	0.0275076	-0.00381265	0.216069	0.289404	0
TCGA	GOBP_SUBSTANTIA_NIGRA_DEVELOPMENT	0.0373023	-0.0278407	0.065143	0.00787172	0.0160502	0
TCGA	GOBP_HIPPOCAMPUS_DEVELOPMENT	-0.0147347	0.0161203	-0.030855	0.036232	0.0615592	0
TCGA	GOBP_GLIAL_CELL_DEVELOPMENT	0.00874334	-0.00348019	0.0122235	0.446084	0.530803	0
TCGA	GOBP_THALAMUS_DEVELOPMENT	-0.0104223	0.0706596	-0.0810819	0.00324087	0.00726476	0
TCGA	GOBP_CEREBRAL_CORTEX_CELL_MIGRATION	0.00440876	0.0273257	-0.022917	0.179773	0.247249	0
TCGA	GOBP_CEREBRAL_CORTEX_RADIALLY_ORIENTED_CELL_MIGRATION	0.00896086	0.0207408	-0.0117799	0.494948	0.575851	0
TCGA	GOBP_LAYER_FORMATION_IN_CEREBRAL_CORTEX	-0.0708444	0.0572257	-0.12807	0.013056	0.0250507	0
TCGA	GOBP_CELL_PROLIFERATION_IN_FOREBRAIN	-0.0262193	0.0712637	-0.097483	0.00278201	0.00634834	0
TCGA	GOBP_HYPOTHALAMUS_DEVELOPMENT	0.0673238	0.0304965	0.0368273	0.0266287	0.0469402	0
TCGA	GOBP_PYRAMIDAL_NEURON_DIFFERENTIATION	-0.0770101	0.0236339	-0.100644	0.00898814	0.0180011	0
TCGA	GOBP_FOREBRAIN_REGIONALIZATION	-0.0718523	0.104134	-0.175986	4.14519e-10	3.512e-09	0
TCGA	GOBP_FOREBRAIN_GENERATION_OF_NEURONS	0.0327731	0.040596	-0.0078229	0.069729	0.109119	0
TCGA	GOBP_FOREBRAIN_NEURON_DEVELOPMENT	0.01002	0.0303351	-0.0203151	0.0606653	0.0967557	0
TCGA	GOBP_FOREBRAIN_CELL_MIGRATION	0.00791146	0.0205166	-0.0126051	0.625537	0.695117	0
TCGA	GOBP_OLFACTORY_BULB_INTERNEURON_DIFFERENTIATION	-0.0156062	0.106782	-0.122388	0.00238324	0.00555578	0
TCGA	GOBP_CEREBRAL_CORTEX_GABAERGIC_INTERNEURON_DIFFERENTIATION	-0.0219767	0.0954102	-0.117387	4.89139e-05	0.000170728	0
TCGA	GOBP_CEREBRAL_CORTEX_NEURON_DIFFERENTIATION	-0.0386786	0.0652072	-0.103886	0.000597176	0.00161292	0
TCGA	GOBP_DORSAL_VENTRAL_NEURAL_TUBE_PATTERNING	-0.124273	0.0237615	-0.148035	3.96334e-05	0.000140953	0
TCGA	GOBP_NEURAL_TUBE_DEVELOPMENT	-0.0980036	0.0191542	-0.117158	3.25673e-11	3.20308e-10	0
TCGA	GOBP_REGULATION_OF_CEREBELLAR_GRANULE_CELL_PRECURSOR_PROLIFERATION	-0.027583	0.0941098	-0.121693	0.00409019	0.00897436	0
TCGA	GOBP_CENTRAL_NERVOUS_SYSTEM_PROJECTION_NEURON_AXONOGENESIS	-0.00352155	0.0398695	-0.043391	0.0964469	0.14477	0
TCGA	GOBP_CENTRAL_NERVOUS_SYSTEM_NEURON_DIFFERENTIATION	-0.0505803	0.0553657	-0.105946	8.03964e-09	5.66683e-08	0
TCGA	GOBP_CENTRAL_NERVOUS_SYSTEM_NEURON_DEVELOPMENT	-0.0595653	0.0325927	-0.092158	6.08562e-06	2.59098e-05	0
TCGA	GOBP_CENTRAL_NERVOUS_SYSTEM_NEURON_AXONOGENESIS	-0.0489218	0.0264215	-0.0753433	0.00579689	0.0122173	0
TCGA	GOBP_TELENCEPHALON_REGIONALIZATION	-0.118944	0.0819851	-0.200929	3.81799e-05	0.000136261	0
TCGA	GOBP_PITUITARY_GLAND_DEVELOPMENT	-0.0342009	0.0997083	-0.133909	5.26975e-08	3.2417e-07	0
TCGA	GOBP_ADENOHYPOPHYSIS_DEVELOPMENT	-0.110981	0.135014	-0.245995	2.24088e-09	1.71531e-08	0
TCGA	GOBP_CEREBRAL_CORTEX_DEVELOPMENT	-0.0542536	0.0126823	-0.066936	0.0105014	0.0206569	0
TCGA	GOBP_OLFACTORY_LOBE_DEVELOPMENT	-0.0336129	0.0306929	-0.0643057	0.0162303	0.0303943	0
TCGA	GOBP_TELENCEPHALON_GLIAL_CELL_MIGRATION	0.0103701	0.0242643	-0.0138942	0.61136	0.682201	0
TCGA	GOBP_METENCEPHALON_DEVELOPMENT	-0.00666566	0.0249752	-0.0316409	0.00466972	0.0101018	0
TCGA	GOBP_CORPUS_CALLOSUM_DEVELOPMENT	-0.0347112	-0.0152325	-0.0194787	0.143179	0.203824	0
TCGA	GOBP_MEMBRANE_DOCKING	-0.0173544	-0.0385251	0.0211708	0.652923	0.719875	0
TCGA	GOBP_REGULATION_OF_CELL_CELL_ADHESION	0.183001	-0.0695507	0.252552	1.77359e-14	2.61656e-13	0
TCGA	GOBP_NEGATIVE_REGULATION_OF_CELL_CELL_ADHESION	0.166884	-0.0437202	0.210605	1.18043e-12	1.37086e-11	0
TCGA	GOBP_POSITIVE_REGULATION_OF_CELL_CELL_ADHESION	0.215071	-0.105195	0.320266	5.13844e-17	1.0957e-15	0
TCGA	GOBP_CELLULAR_PROCESS_INVOLVED_IN_REPRODUCTION_IN_MULTICELLULAR_ORGANISM	0.0018892	0.0291231	-0.0272339	0.0310389	0.0536155	0
TCGA	GOBP_DIGESTIVE_SYSTEM_PROCESS	0.0283266	0.0581049	-0.0297783	0.233249	0.307705	0
TCGA	GOBP_OVULATION_CYCLE_PROCESS	-0.00498378	0.0276644	-0.0326481	0.0321769	0.0554304	0
TCGA	GOBP_REGULATION_OF_CELL_MORPHOGENESIS	-0.00902182	-0.00484568	-0.00417614	0.958368	0.967711	0
TCGA	GOBP_GLAND_MORPHOGENESIS	-0.0296605	0.0384428	-0.0681033	0.00544982	0.0116014	0
TCGA	GOBP_RIBONUCLEOPROTEIN_COMPLEX_BIOGENESIS	-0.00504755	-0.0645584	0.0595109	0.240079	0.31524	0
TCGA	GOBP_DNA_STRAND_ELONGATION	0.130984	-0.105646	0.23663	0.0024601	0.00571396	0
TCGA	GOBP_EXTRACELLULAR_MATRIX_DISASSEMBLY	0.0558755	-0.0113012	0.0671767	0.116997	0.171014	0
TCGA	GOBP_ELECTRON_TRANSPORT_CHAIN	-0.0579288	-0.0787565	0.0208277	0.127648	0.184038	0
TCGA	GOBP_RESPIRATORY_ELECTRON_TRANSPORT_CHAIN	-0.0491911	-0.0887702	0.0395791	0.335975	0.418937	0
TCGA	GOBP_SIGNAL_TRANSDUCTION_INVOLVED_IN_REGULATION_OF_GENE_EXPRESSION	-0.0570947	0.0470347	-0.104129	1.97543e-05	7.64707e-05	0
TCGA	GOBP_CD40_SIGNALING_PATHWAY	0.325926	-0.153018	0.478944	8.08568e-24	6.03453e-22	0
TCGA	GOBP_ADAPTATION_OF_SIGNALING_PATHWAY	-0.0019404	0.0429395	-0.0448799	0.0559574	0.0902683	0
TCGA	GOBP_SIGNAL_RELEASE	-0.0316331	0.0410647	-0.0726978	2.88245e-10	2.50487e-09	0
TCGA	GOBP_METAL_ION_TRANSPORT	0.0567926	0.0068507	0.0499419	0.0158099	0.0297278	0
TCGA	GOBP_CELLULAR_ANION_HOMEOSTASIS	0.0304388	0.0271382	0.0033006	0.917989	0.937194	0
TCGA	GOBP_CELLULAR_MONOVALENT_INORGANIC_CATION_HOMEOSTASIS	0.0167755	-0.0122626	0.0290381	0.366652	0.451202	0
TCGA	GOBP_CELLULAR_POTASSIUM_ION_HOMEOSTASIS	-0.0939335	0.0985101	-0.192444	0.00019566	0.000605472	0
TCGA	GOBP_ESTABLISHMENT_OF_CELL_POLARITY	-0.0636193	-0.00748471	-0.0561346	0.000868691	0.00224471	0
TCGA	GOBP_MAINTENANCE_OF_CELL_POLARITY	0.0293576	-0.0482621	0.0776197	0.00173259	0.00416133	0
TCGA	GOBP_LAMELLIPODIUM_ASSEMBLY	-0.0230772	-0.0277757	0.00469851	0.392623	0.47726	0
TCGA	GOBP_MICROVILLUS_ASSEMBLY	-0.100932	-0.0020064	-0.0989261	0.00187326	0.00447801	0
TCGA	GOBP_ACTIN_FILAMENT_DEPOLYMERIZATION	0.00411145	-0.022707	0.0268185	0.586076	0.659352	0
TCGA	GOBP_ACTIN_FILAMENT_BASED_MOVEMENT	-0.0340027	0.0361406	-0.0701433	4.25234e-05	0.000150493	0
TCGA	GOBP_MUSCLE_FILAMENT_SLIDING	0.0829886	0.00904582	0.0739428	0.0297911	0.0518484	0
TCGA	GOBP_PEPTIDE_HORMONE_SECRETION	-0.0491018	0.0465207	-0.0956225	5.89612e-11	5.67795e-10	0
TCGA	GOBP_INSULIN_SECRETION	-0.055741	0.0427231	-0.0984642	3.46865e-10	2.97354e-09	0
TCGA	GOBP_MYELOID_CELL_DIFFERENTIATION	0.0552567	-0.0450498	0.100307	2.62849e-05	9.8013e-05	0
TCGA	GOBP_REGULATION_OF_ENDOCYTOSIS	-0.00530319	-0.0198123	0.0145092	0.552926	0.629029	0
TCGA	GOBP_NATURAL_KILLER_CELL_ACTIVATION	0.288787	-0.06034	0.349127	2.28677e-24	2.00092e-22	0
TCGA	GOBP_WATER_HOMEOSTASIS	-0.0679572	0.0587471	-0.126704	9.80311e-09	6.7413e-08	0
TCGA	GOBP_REGULATION_OF_WNT_SIGNALING_PATHWAY	-0.0291374	-0.00159177	-0.0275457	0.139551	0.199386	0
TCGA	GOBP_SPHINGOLIPID_BIOSYNTHETIC_PROCESS	-0.0568199	-0.00840146	-0.0484184	0.0483153	0.07943	0
TCGA	GOBP_PROTEIN_IMPORT_INTO_MITOCHONDRIAL_MATRIX	-0.051966	-0.0839287	0.0319627	0.200155	0.270949	0
TCGA	GOBP_PANCREATIC_JUICE_SECRETION	0.0010752	0.0338955	-0.0328203	0.31755	0.399595	0
TCGA	GOBP_PROTEOGLYCAN_BIOSYNTHETIC_PROCESS	-0.081616	0.00645868	-0.0880747	0.00341552	0.00762259	0
TCGA	GOBP_PLATELET_ACTIVATION	0.0911838	-0.0415775	0.132761	0.000551427	0.00150134	0
TCGA	GOBP_POSITIVE_REGULATION_OF_WNT_SIGNALING_PATHWAY	-0.00134921	-0.0315384	0.0301892	0.125035	0.180887	0
TCGA	GOBP_NEGATIVE_REGULATION_OF_WNT_SIGNALING_PATHWAY	0.0158045	-0.0272174	0.0430219	0.0672573	0.105839	0
TCGA	GOBP_B_CELL_DIFFERENTIATION	0.218304	-0.0848714	0.303175	2.08438e-13	2.67127e-12	0
TCGA	GOBP_COLLAGEN_FIBRIL_ORGANIZATION	-0.0809451	-0.0824302	0.00148507	0.742142	0.795265	0
TCGA	GOBP_HEPARAN_SULFATE_PROTEOGLYCAN_METABOLIC_PROCESS	-0.118667	0.0161551	-0.134822	0.000511693	0.00140827	0
TCGA	GOBP_HEPARIN_METABOLIC_PROCESS	-0.10182	0.0207301	-0.12255	0.0183876	0.03402	0
TCGA	GOBP_DERMATAN_SULFATE_METABOLIC_PROCESS	-0.0659982	-0.0127079	-0.0532903	0.0840847	0.128766	0
TCGA	GOBP_CHONDROITIN_SULFATE_BIOSYNTHETIC_PROCESS	-0.00859673	-0.0439302	0.0353335	0.800739	0.843802	0
TCGA	GOBP_CHONDROITIN_SULFATE_CATABOLIC_PROCESS	0.0415419	0.0171203	0.0244216	0.628253	0.697067	0
TCGA	GOBP_HYALURONAN_METABOLIC_PROCESS	0.066896	-0.00657766	0.0734736	0.0395982	0.0666979	0
TCGA	GOBP_HYALURONAN_BIOSYNTHETIC_PROCESS	-0.00126703	-0.0184986	0.0172316	0.523837	0.604473	0
TCGA	GOBP_HYALURONAN_CATABOLIC_PROCESS	0.0365455	-0.0464798	0.0830253	0.118346	0.172686	0
TCGA	GOBP_KERATINOCYTE_DIFFERENTIATION	0.0631296	0.0947805	-0.0316509	0.0700246	0.109447	0
TCGA	GOBP_INTERFERON_BETA_PRODUCTION	0.149817	-0.113692	0.263509	1.11423e-13	1.46117e-12	1
TCGA	GOBP_MEGAKARYOCYTE_DIFFERENTIATION	-0.0304028	-0.00326611	-0.0271367	0.222175	0.296175	0
TCGA	GOBP_MONOCYTE_DIFFERENTIATION	0.108878	-0.0480161	0.156894	0.00333229	0.00744995	0
TCGA	GOBP_MACROPHAGE_DIFFERENTIATION	0.144279	-0.0758571	0.220137	1.51721e-09	1.19377e-08	0
TCGA	GOBP_MALE_SEX_DETERMINATION	-0.0105844	0.121742	-0.132326	4.34261e-06	1.89336e-05	0
TCGA	GOBP_MYOFIBRIL_ASSEMBLY	-0.0455499	0.0265394	-0.0720893	0.00906399	0.0181173	0
TCGA	GOBP_GROWTH_HORMONE_SECRETION	0.00840717	0.0263582	-0.017951	0.532607	0.611672	0
TCGA	GOBP_LIPID_MODIFICATION	-0.06447	0.00578099	-0.070251	0.000334983	0.000972008	0
TCGA	GOBP_LIPID_GLYCOSYLATION	-0.0356385	0.0228066	-0.0584451	0.0767927	0.118927	0
TCGA	GOBP_CHROMOSOME_CONDENSATION	0.0329317	-0.0982412	0.131173	0.0202179	0.0369351	0
TCGA	GOBP_MAINTENANCE_OF_GASTROINTESTINAL_EPITHELIUM	0.0473282	0.0226294	0.0246988	0.565168	0.640373	0
TCGA	GOBP_REGULATION_OF_OSSIFICATION	0.00123403	0.0095303	-0.00829627	0.0921123	0.139128	0
TCGA	GOBP_NEGATIVE_REGULATION_OF_OSSIFICATION	0.0342435	0.0235581	0.0106854	0.459342	0.543268	0
TCGA	GOBP_BONE_MINERALIZATION	-0.006126	-0.00252669	-0.00359931	0.438121	0.52243	0
TCGA	GOBP_POSITIVE_REGULATION_OF_CELL_GROWTH	-0.00312597	0.0111255	-0.0142514	0.211132	0.283765	0
TCGA	GOBP_NEGATIVE_REGULATION_OF_CELL_GROWTH	-0.0182862	-0.000689525	-0.0175967	0.056824	0.0914627	0
TCGA	GOBP_POLY_N_ACETYLLACTOSAMINE_METABOLIC_PROCESS	-0.0908968	0.0645465	-0.155443	5.01322e-05	0.000174261	0
TCGA	GOBP_OSTEOCLAST_DIFFERENTIATION	0.136766	-0.0543891	0.191155	5.83605e-07	3.0069e-06	0
TCGA	GOBP_MELANOCYTE_DIFFERENTIATION	-0.0375856	0.0437139	-0.0812995	0.00491285	0.0105513	0
TCGA	GOBP_STABILIZATION_OF_MEMBRANE_POTENTIAL	0.0107627	0.0850447	-0.0742821	0.0591037	0.0946518	0
TCGA	GOBP_ADRENAL_GLAND_DEVELOPMENT	-0.0128951	0.0916719	-0.104567	3.4638e-06	1.54607e-05	0
TCGA	GOBP_INTERFERON_GAMMA_MEDIATED_SIGNALING_PATHWAY	0.351718	-0.165186	0.516905	4.48909e-26	8.43783e-24	1
TCGA	GOBP_FRUCTOSE_1_6_BISPHOSPHATE_METABOLIC_PROCESS	0.107013	-0.0417836	0.148796	0.000294431	0.000864221	0
TCGA	GOBP_MEMBRANE_DISASSEMBLY	0.0993344	-0.113505	0.212839	1.4264e-06	6.82277e-06	0
TCGA	GOBP_PRODUCTION_OF_SIRNA_INVOLVED_IN_RNA_INTERFERENCE	0.0457721	-0.090589	0.136361	0.390505	0.475369	0
TCGA	GOBP_SLEEP	0.0888543	0.0516944	0.0371598	0.328809	0.411213	0
TCGA	GOBP_PERISTALSIS	0.131466	0.0504996	0.0809668	0.0989681	0.147942	0
TCGA	GOBP_UBIQUITIN_DEPENDENT_ERAD_PATHWAY	-0.0305913	-0.0650671	0.0344759	0.324557	0.406999	0
TCGA	GOBP_REGULATION_OF_COMPLEMENT_ACTIVATION	0.176375	-0.0135629	0.189938	5.86509e-07	3.0188e-06	0
TCGA	GOBP_TRNA_METHYLATION	-0.059059	-0.057461	-0.00159801	0.55485	0.630653	0
TCGA	GOBP_MATURATION_OF_SSU_RRNA	-0.00872893	-0.0775249	0.0687959	0.124095	0.179681	0
TCGA	GOBP_FATTY_ACID_ELONGATION	0.0128443	-0.0342214	0.0470657	0.32597	0.408267	0
TCGA	GOBP_REGULATION_OF_BONE_MINERALIZATION	0.00123863	-0.00319445	0.00443308	0.858223	0.888511	0
TCGA	GOBP_POSITIVE_REGULATION_OF_BONE_MINERALIZATION	-0.00101158	0.0351625	-0.0361741	0.160404	0.224133	0
TCGA	GOBP_NEGATIVE_REGULATION_OF_BONE_MINERALIZATION	0.0929044	-0.0190969	0.112001	0.0169674	0.0316347	0
TCGA	GOBP_REGULATION_OF_BMP_SIGNALING_PATHWAY	-0.0513429	0.0629469	-0.11429	3.21752e-05	0.000117221	0
TCGA	GOBP_NEGATIVE_REGULATION_OF_TRANSFORMING_GROWTH_FACTOR_BETA_RECEPTOR_SIGNALING_PATHWAY	-0.0559642	0.0128335	-0.0687977	0.00696088	0.0144131	0
TCGA	GOBP_POSITIVE_REGULATION_OF_BMP_SIGNALING_PATHWAY	-0.0712359	0.0635432	-0.134779	0.000251841	0.000753149	0
TCGA	GOBP_NEGATIVE_REGULATION_OF_BMP_SIGNALING_PATHWAY	-0.0470807	0.0566088	-0.103689	5.485e-05	0.000189234	0
TCGA	GOBP_NEGATIVE_REGULATION_OF_AXON_EXTENSION	-0.0532143	0.0208566	-0.074071	0.0122373	0.0236588	0
TCGA	GOBP_INTRACELLULAR_STEROID_HORMONE_RECEPTOR_SIGNALING_PATHWAY	-0.059261	0.0096399	-0.0689009	6.99467e-05	0.000235867	0
TCGA	GOBP_INTRACELLULAR_ESTROGEN_RECEPTOR_SIGNALING_PATHWAY	-0.0449111	0.00518664	-0.0500978	0.00257151	0.00593471	0
TCGA	GOBP_ANDROGEN_RECEPTOR_SIGNALING_PATHWAY	-0.101207	0.0349925	-0.136199	3.32825e-07	1.79499e-06	0
TCGA	GOBP_INTRACELLULAR_RECEPTOR_SIGNALING_PATHWAY	-0.00958199	-0.00291124	-0.00667075	0.917228	0.936607	0
TCGA	GOBP_ADULT_BEHAVIOR	-0.0587018	0.0497613	-0.108463	8.3772e-11	7.87301e-10	0
TCGA	GOBP_MALE_GENITALIA_DEVELOPMENT	-0.026451	0.0881744	-0.114625	0.000123287	0.000398778	0
TCGA	GOBP_FEMALE_GENITALIA_DEVELOPMENT	0.0617477	0.0194026	0.0423451	0.308364	0.390164	0
TCGA	GOBP_COLLAGEN_CATABOLIC_PROCESS	0.0652849	-0.01776	0.0830449	0.0051981	0.0111169	0
TCGA	GOBP_NUCLEAR_BODY_ORGANIZATION	0.0848086	-0.0702944	0.155103	0.000619714	0.00166317	0
TCGA	GOBP_NEUTROPHIL_CHEMOTAXIS	0.215587	-0.0858066	0.301393	3.2328e-15	5.20841e-14	0
TCGA	GOBP_LEUKOCYTE_CHEMOTAXIS	0.170618	-0.0454726	0.216091	2.57051e-12	2.87976e-11	0
TCGA	GOBP_AMINOGLYCOSIDE_ANTIBIOTIC_METABOLIC_PROCESS	0.0321615	-0.027691	0.0598525	0.91115	0.9319	0
TCGA	GOBP_REGULATION_OF_VITAMIN_METABOLIC_PROCESS	0.294931	-0.0733768	0.368307	4.13833e-16	7.5276e-15	0
TCGA	GOBP_CYTOSKELETON_DEPENDENT_INTRACELLULAR_TRANSPORT	-0.120154	-0.0119392	-0.108215	1.89772e-08	1.24915e-07	0
TCGA	GOBP_OVULATION	-0.00668577	0.0138886	-0.0205744	0.84021	0.874501	0
TCGA	GOBP_SEQUESTERING_OF_TRIGLYCERIDE	-0.000781293	-0.00803273	0.00725143	0.880842	0.906749	0
TCGA	GOBP_REGULATION_OF_NUCLEOTIDE_BIOSYNTHETIC_PROCESS	-0.00853479	3.26775e-05	-0.00856747	0.428563	0.513203	0
TCGA	GOBP_POSITIVE_REGULATION_OF_NUCLEOTIDE_BIOSYNTHETIC_PROCESS	-0.0139294	0.0230021	-0.0369315	0.464005	0.547507	0
TCGA	GOBP_REGULATION_OF_ACTIN_FILAMENT_LENGTH	0.0185681	-0.0266426	0.0452106	0.00549823	0.0116898	0
TCGA	GOBP_NEGATIVE_REGULATION_OF_ACTIN_FILAMENT_DEPOLYMERIZATION	-0.0169684	0.00299173	-0.0199601	0.346666	0.429943	0
TCGA	GOBP_POSITIVE_REGULATION_OF_ACTIN_FILAMENT_DEPOLYMERIZATION	0.022542	-0.0442703	0.0668124	0.0558346	0.0901273	0
TCGA	GOBP_NEGATIVE_REGULATION_OF_ACTIN_FILAMENT_POLYMERIZATION	-0.0047629	-0.0132298	0.00846689	0.933968	0.949307	0
TCGA	GOBP_POSITIVE_REGULATION_OF_ACTIN_FILAMENT_POLYMERIZATION	0.0553718	-0.0501917	0.105564	1.51776e-07	8.67412e-07	0
TCGA	GOBP_PROSTATE_GLAND_DEVELOPMENT	-0.0845749	0.0656683	-0.150243	0.000303273	0.000886584	0
TCGA	GOBP_GRANULOCYTE_DIFFERENTIATION	0.0808385	-0.0356112	0.11645	0.000271346	0.000803899	0
TCGA	GOBP_REGULATION_OF_GRANULOCYTE_DIFFERENTIATION	0.120883	-0.06149	0.182373	7.09474e-06	2.98803e-05	0
TCGA	GOBP_REGULATION_OF_EPITHELIAL_CELL_DIFFERENTIATION	-0.0443513	0.0141135	-0.0584648	0.00300814	0.0068062	0
TCGA	GOBP_NEGATIVE_REGULATION_OF_EPITHELIAL_CELL_DIFFERENTIATION	-0.0142981	0.01755	-0.0318482	0.0530695	0.0862953	0
TCGA	GOBP_POSITIVE_REGULATION_OF_EPITHELIAL_CELL_DIFFERENTIATION	-0.0291834	0.012439	-0.0416224	0.000435366	0.00122003	0
TCGA	GOBP_POLARIZED_EPITHELIAL_CELL_DIFFERENTIATION	-0.120228	0.0218197	-0.142048	2.01697e-08	1.3225e-07	0
TCGA	GOBP_CORTICAL_CYTOSKELETON_ORGANIZATION	0.0381059	-0.0515438	0.0896497	0.000226735	0.000687796	0
TCGA	GOBP_CORTICAL_ACTIN_CYTOSKELETON_ORGANIZATION	0.0350329	-0.0386031	0.073636	0.0265633	0.0468412	0
TCGA	GOBP_THYROID_GLAND_DEVELOPMENT	-0.0825825	0.045478	-0.12806	2.42726e-07	1.3375e-06	0
TCGA	GOBP_MAMMARY_GLAND_DEVELOPMENT	-0.0614593	0.0379829	-0.0994422	1.8664e-08	1.23173e-07	0
TCGA	GOBP_REGULATION_OF_B_CELL_PROLIFERATION	0.29679	-0.125806	0.422596	5.61954e-17	1.17848e-15	0
TCGA	GOBP_NEGATIVE_REGULATION_OF_B_CELL_PROLIFERATION	0.371365	-0.129675	0.50104	2.80615e-16	5.27453e-15	0
TCGA	GOBP_POSITIVE_REGULATION_OF_B_CELL_PROLIFERATION	0.24766	-0.0989444	0.346605	3.38494e-15	5.41911e-14	0
TCGA	GOBP_FOREBRAIN_DEVELOPMENT	-0.00772409	0.0343424	-0.0420665	0.00242139	0.00563695	0
TCGA	GOBP_MIDBRAIN_DEVELOPMENT	-0.0448174	0.0152075	-0.0600249	0.000700683	0.00185884	0
TCGA	GOBP_HINDBRAIN_DEVELOPMENT	-0.0183342	0.0433988	-0.061733	6.22161e-05	0.000212624	0
TCGA	GOBP_NOTOCHORD_DEVELOPMENT	-0.0537713	0.0236192	-0.0773905	0.00209056	0.00493469	0
TCGA	GOBP_REGULATION_OF_VASCULAR_ENDOTHELIAL_GROWTH_FACTOR_RECEPTOR_SIGNALING_PATHWAY	0.0184595	0.0044829	0.0139766	0.806667	0.848112	0
TCGA	GOBP_NEGATIVE_REGULATION_OF_VASCULAR_ENDOTHELIAL_GROWTH_FACTOR_RECEPTOR_SIGNALING_PATHWAY	-0.0496817	-0.0118305	-0.0378512	0.152016	0.21436	0
TCGA	GOBP_POSITIVE_REGULATION_OF_VASCULAR_ENDOTHELIAL_GROWTH_FACTOR_RECEPTOR_SIGNALING_PATHWAY	0.0740879	-0.0264132	0.100501	0.052251	0.0851554	0
TCGA	GOBP_ASTRAL_MICROTUBULE_ORGANIZATION	-0.073608	0.00924812	-0.0828561	0.00276461	0.00632	0
TCGA	GOBP_ENDOPLASMIC_RETICULUM_UNFOLDED_PROTEIN_RESPONSE	-0.0554216	-0.0288926	-0.026529	0.229144	0.303473	0
TCGA	GOBP_RESPONSE_TO_CAFFEINE	0.0180516	0.00151782	0.0165338	0.927116	0.943855	0
TCGA	GOBP_PANCREAS_DEVELOPMENT	-0.0594859	0.0594428	-0.118929	9.33268e-11	8.64295e-10	0
TCGA	GOBP_ENDOCRINE_PANCREAS_DEVELOPMENT	-0.0768705	0.0624718	-0.139342	6.73838e-09	4.79625e-08	0
TCGA	GOBP_MICROTUBULE_ORGANIZING_CENTER_ORGANIZATION	-0.0147595	-0.08426	0.0695005	0.290523	0.371387	0
TCGA	GOBP_ACTOMYOSIN_STRUCTURE_ORGANIZATION	-0.0444587	-0.0118551	-0.0326036	0.0119422	0.02315	0
TCGA	GOBP_PRIMARY_MIRNA_PROCESSING	-0.107972	0.0137344	-0.121706	0.00692091	0.0143538	0
TCGA	GOBP_PRE_MIRNA_PROCESSING	-0.0540527	-0.035009	-0.0190437	0.605328	0.677257	0
TCGA	GOBP_CHROMATIN_REMODELING_AT_CENTROMERE	0.214722	-0.161259	0.375981	5.26245e-06	2.26714e-05	0
TCGA	GOBP_REGULATION_OF_HISTONE_MODIFICATION	-0.0349561	-0.0160632	-0.0188929	0.125271	0.181074	0
TCGA	GOBP_NEGATIVE_REGULATION_OF_HISTONE_MODIFICATION	-0.0266428	-0.0466776	0.0200348	0.164728	0.229543	0
TCGA	GOBP_REGULATION_OF_HISTONE_METHYLATION	-0.0252363	-0.0246807	-0.000555621	0.32597	0.408267	0
TCGA	GOBP_NEGATIVE_REGULATION_OF_HISTONE_METHYLATION	-0.0596718	-0.0688496	0.00917782	0.936254	0.951439	0
TCGA	GOBP_POSITIVE_REGULATION_OF_HISTONE_METHYLATION	-0.0655409	-0.0453016	-0.0202393	0.374843	0.458946	0
TCGA	GOBP_REGULATION_OF_HISTONE_DEACETYLATION	-0.0809714	0.017712	-0.0986834	0.00138507	0.00340729	0
TCGA	GOBP_POSITIVE_REGULATION_OF_HISTONE_DEACETYLATION	-0.121835	0.0460847	-0.167919	0.000452975	0.00126588	0
TCGA	GOBP_EMBRYONIC_CAMERA_TYPE_EYE_DEVELOPMENT	-0.104045	0.0805629	-0.184608	2.83347e-13	3.54184e-12	0
TCGA	GOBP_STRESS_ACTIVATED_PROTEIN_KINASE_SIGNALING_CASCADE	0.033535	-0.0224138	0.0559489	0.0091404	0.0182484	0
TCGA	GOBP_REGENERATION	-0.00304032	0.00754245	-0.0105828	0.492529	0.573694	0
TCGA	GOBP_ANIMAL_ORGAN_REGENERATION	0.050308	-0.0210321	0.0713401	0.000236304	0.000713412	0
TCGA	GOBP_NEURON_PROJECTION_REGENERATION	-0.0375976	0.0427036	-0.0803012	0.000175868	0.000548236	0
TCGA	GOBP_MICROTUBULE_POLYMERIZATION_OR_DEPOLYMERIZATION	-0.0660437	-0.0124933	-0.0535504	0.0031812	0.00714678	0
TCGA	GOBP_REGULATION_OF_MICROTUBULE_POLYMERIZATION_OR_DEPOLYMERIZATION	-0.0812091	-0.0100377	-0.0711713	4.9723e-05	0.000172957	0
TCGA	GOBP_NEGATIVE_REGULATION_OF_MICROTUBULE_POLYMERIZATION_OR_DEPOLYMERIZATION	-0.10168	0.00546116	-0.107141	1.00047e-05	4.08477e-05	0
TCGA	GOBP_POSITIVE_REGULATION_OF_MICROTUBULE_POLYMERIZATION_OR_DEPOLYMERIZATION	-0.0765	-0.0124403	-0.0640597	0.00906399	0.0181173	0
TCGA	GOBP_REGULATION_OF_MICROTUBULE_POLYMERIZATION	-0.112578	0.00616516	-0.118743	2.12853e-06	9.91035e-06	0
TCGA	GOBP_REGULATION_OF_MICROTUBULE_DEPOLYMERIZATION	-0.10152	0.0235716	-0.125092	9.31563e-07	4.58553e-06	0
TCGA	GOBP_NEGATIVE_REGULATION_OF_MICROTUBULE_POLYMERIZATION	-0.0650722	-0.0115632	-0.0535091	0.302488	0.384069	0
TCGA	GOBP_RRNA_PSEUDOURIDINE_SYNTHESIS	0.00971661	-0.136974	0.14669	0.220727	0.294632	0
TCGA	GOBP_CYTOPLASMIC_MICROTUBULE_ORGANIZATION	-0.0708277	0.0282653	-0.099093	1.95015e-05	7.58391e-05	0
TCGA	GOBP_RNA_3_END_PROCESSING	0.00355353	-0.0631601	0.0667136	0.218927	0.292383	0
TCGA	GOBP_MRNA_3_END_PROCESSING	-0.0157349	-0.0701801	0.0544451	0.368179	0.452643	0
TCGA	GOBP_RRNA_3_END_PROCESSING	0.124989	-0.138463	0.263452	0.000705594	0.00186894	0
TCGA	GOBP_SNO_S_RNA_3_END_PROCESSING	0.0380756	-0.0770491	0.115125	0.235889	0.310541	0
TCGA	GOBP_DEVELOPMENTAL_INDUCTION	-0.160845	0.0950402	-0.255885	2.47927e-14	3.56439e-13	0
TCGA	GOBP_ANAPHASE_PROMOTING_COMPLEX_DEPENDENT_CATABOLIC_PROCESS	0.26922	-0.194696	0.463916	4.65658e-10	3.92561e-09	0
TCGA	GOBP_SCF_DEPENDENT_PROTEASOMAL_UBIQUITIN_DEPENDENT_PROTEIN_CATABOLIC_PROCESS	0.108325	-0.0836834	0.192009	1.21717e-09	9.72782e-09	0
TCGA	GOBP_RRNA_METHYLATION	-0.0692616	-0.032752	-0.0365095	0.959131	0.968289	0
TCGA	GOBP_PSEUDOPODIUM_ORGANIZATION	-0.00816712	-0.00266438	-0.00550274	0.846955	0.879717	0
TCGA	GOBP_REGULATION_OF_PSEUDOPODIUM_ASSEMBLY	-0.0162745	0.0019039	-0.0181784	0.528839	0.608447	0
TCGA	GOBP_REGULATION_OF_CYCLASE_ACTIVITY	0.0739439	0.0329636	0.0409803	0.689232	0.751418	0
TCGA	GOBP_POSITIVE_REGULATION_OF_CYCLASE_ACTIVITY	-0.0224656	0.0477211	-0.0701866	0.0945426	0.142375	0
TCGA	GOBP_REGULATION_OF_GUANYLATE_CYCLASE_ACTIVITY	0.038127	0.0842108	-0.0460838	0.30519	0.386727	0
TCGA	GOBP_RETINAL_GANGLION_CELL_AXON_GUIDANCE	-0.0368993	0.0589124	-0.0958118	0.000528383	0.00144792	0
TCGA	GOBP_MEMBRANE_PROTEIN_INTRACELLULAR_DOMAIN_PROTEOLYSIS	-0.0649107	-0.0499557	-0.014955	0.805926	0.847508	0
TCGA	GOBP_LYMPHOCYTE_COSTIMULATION	0.350135	-0.158509	0.508644	1.16792e-22	7.59897e-21	0
TCGA	GOBP_REPLICATION_FORK_PROCESSING	0.133054	-0.0941754	0.22723	0.00013588	0.000435073	0
TCGA	GOBP_NEGATIVE_REGULATION_OF_CELLULAR_CATABOLIC_PROCESS	-0.042615	-0.00683975	-0.0357752	0.000630722	0.00168825	0
TCGA	GOBP_NEGATIVE_REGULATION_OF_PROTEIN_CONTAINING_COMPLEX_ASSEMBLY	-0.0359477	0.000574346	-0.0365221	0.0772729	0.119525	0
TCGA	GOBP_POSITIVE_REGULATION_OF_PROTEIN_CONTAINING_COMPLEX_ASSEMBLY	0.0474023	-0.0413168	0.0887191	1.03693e-06	5.05515e-06	0
TCGA	GOBP_REGULATION_OF_VESICLE_FUSION	0.0200399	0.0187974	0.00124252	0.89219	0.916757	0
TCGA	GOBP_POSITIVE_REGULATION_OF_VESICLE_FUSION	0.00422106	-0.0204866	0.0247077	0.949212	0.961335	0
TCGA	GOBP_REGULATION_OF_CELL_KILLING	0.365031	-0.156767	0.521798	3.4556e-24	2.87494e-22	0
TCGA	GOBP_NEGATIVE_REGULATION_OF_CELL_KILLING	0.421022	-0.183545	0.604567	9.00331e-29	4.87338e-26	0
TCGA	GOBP_POSITIVE_REGULATION_OF_CELL_KILLING	0.402087	-0.180192	0.582279	5.50456e-26	9.97702e-24	0
TCGA	GOBP_NEGATIVE_REGULATION_OF_CELL_PROJECTION_ORGANIZATION	-0.0236206	-0.00147112	-0.0221495	0.0228279	0.0409658	0
TCGA	GOBP_POSITIVE_REGULATION_OF_CELL_PROJECTION_ORGANIZATION	-0.0232252	-0.000130468	-0.0230947	0.077917	0.120337	0
TCGA	GOBP_NEGATIVE_REGULATION_OF_DEFENSE_RESPONSE	0.2108	-0.076269	0.287069	1.73144e-19	5.26171e-18	0
TCGA	GOBP_POSITIVE_REGULATION_OF_DEFENSE_RESPONSE	0.213452	-0.0835392	0.296992	2.67579e-27	7.14719e-25	0
TCGA	GOBP_INTERFERON_GAMMA_PRODUCTION	0.354694	-0.127956	0.482651	6.83041e-25	7.70318e-23	1
TCGA	GOBP_KERATINIZATION	0.0753462	0.124865	-0.0495186	0.0908246	0.137551	0
TCGA	GOBP_REGULATION_OF_MRNA_3_END_PROCESSING	-0.0444786	-0.0501671	0.00568844	0.823771	0.861277	0
TCGA	GOBP_POSITIVE_REGULATION_OF_MRNA_3_END_PROCESSING	0.0227489	-0.0552897	0.0780386	0.672379	0.736843	0
TCGA	GOBP_NUCLEAR_ENVELOPE_REASSEMBLY	0.00868569	-0.0519836	0.0606693	0.198144	0.268657	0
TCGA	GOBP_CHROMATIN_DISASSEMBLY	-0.124205	0.0112782	-0.135483	0.00556337	0.0118134	0
TCGA	GOBP_PROTEIN_CONTAINING_COMPLEX_LOCALIZATION	-0.0262097	-0.0403833	0.0141736	0.837964	0.873417	0
TCGA	GOBP_RUFFLE_ORGANIZATION	0.094345	-0.0545222	0.148867	1.15443e-08	7.84299e-08	0
TCGA	GOBP_ACTIN_CYTOSKELETON_REORGANIZATION	0.00164075	-0.00637299	0.00801374	0.886135	0.911643	0
TCGA	GOBP_DNA_INTEGRITY_CHECKPOINT	0.0282214	-0.0732088	0.10143	0.00544982	0.0116014	0
TCGA	GOBP_L_ALPHA_AMINO_ACID_TRANSMEMBRANE_TRANSPORT	0.0309696	0.0119933	0.0189763	0.38054	0.464688	1
TCGA	GOBP_INTRA_S_DNA_DAMAGE_CHECKPOINT	0.043631	-0.104545	0.148176	0.00368796	0.00816596	0
TCGA	GOBP_MEMBRANE_RAFT_ORGANIZATION	0.0636912	-0.0331968	0.096888	0.0217068	0.0393295	0
TCGA	GOBP_HEMIDESMOSOME_ASSEMBLY	-0.161143	0.0278275	-0.188971	0.446655	0.53111	0
TCGA	GOBP_CELL_SUBSTRATE_ADHESION	-0.00735893	-0.012146	0.0047871	0.540182	0.617995	0
TCGA	GOBP_RECEPTOR_INTERNALIZATION	0.00704573	0.00189537	0.00515036	0.85221	0.883547	0
TCGA	GOBP_ZYMOGEN_ACTIVATION	0.13709	0.00293474	0.134155	0.0001629	0.000512535	0
TCGA	GOBP_PLASMINOGEN_ACTIVATION	0.115799	0.0449772	0.0708216	0.11194	0.16438	0
TCGA	GOBP_KILLING_OF_CELLS_OF_OTHER_ORGANISM	0.222065	0.0214153	0.200649	4.58099e-12	4.96764e-11	0
TCGA	GOBP_REGULATION_OF_MYELINATION	0.00593619	-0.0155092	0.0214453	0.232874	0.30737	0
TCGA	GOBP_POSITIVE_REGULATION_OF_MYELINATION	0.0211713	-0.0326525	0.0538237	0.458761	0.543087	0
TCGA	GOBP_REGULATION_OF_NERVOUS_SYSTEM_PROCESS	-0.0006782	0.0324827	-0.0331609	0.0138856	0.0264724	0
TCGA	GOBP_NEGATIVE_REGULATION_OF_NERVOUS_SYSTEM_PROCESS	0.0426891	0.0513135	-0.00862443	0.298464	0.37991	0
TCGA	GOBP_POSITIVE_REGULATION_OF_NERVOUS_SYSTEM_PROCESS	0.00619641	0.02887	-0.0226736	0.496766	0.577437	0
TCGA	GOBP_REGULATION_OF_PROTEIN_STABILITY	-0.0495346	-0.0209643	-0.0285703	0.0035987	0.00798226	0
TCGA	GOBP_PROTEIN_DESTABILIZATION	-0.0516502	-0.0234696	-0.0281806	0.242387	0.317859	0
TCGA	GOBP_HEAT_GENERATION	-0.0736284	0.0550693	-0.128698	0.000377953	0.00107578	0
TCGA	GOBP_REGULATION_OF_HEAT_GENERATION	-0.0390519	0.0549418	-0.0939937	0.000810796	0.00211232	0
TCGA	GOBP_POSITIVE_REGULATION_OF_HEAT_GENERATION	-0.0778985	0.0529983	-0.130897	0.00926904	0.0184762	0
TCGA	GOBP_LIPOPOLYSACCHARIDE_MEDIATED_SIGNALING_PATHWAY	0.203527	-0.0748229	0.278349	6.40805e-11	6.15925e-10	0
TCGA	GOBP_REGULATION_OF_LIPOPOLYSACCHARIDE_MEDIATED_SIGNALING_PATHWAY	0.138635	-0.0397285	0.178363	7.15884e-06	3.01003e-05	0
TCGA	GOBP_NEGATIVE_REGULATION_OF_LIPOPOLYSACCHARIDE_MEDIATED_SIGNALING_PATHWAY	0.170578	-0.0464641	0.217042	7.30298e-10	5.96822e-09	0
TCGA	GOBP_CELLULAR_RESPONSE_TO_EXTRACELLULAR_STIMULUS	-0.0256037	-0.00466336	-0.0209403	0.034397	0.0588553	0
TCGA	GOBP_CELLULAR_RESPONSE_TO_NUTRIENT	0.0391111	-0.00926265	0.0483737	0.392623	0.47726	0
TCGA	GOBP_PROTECTION_FROM_NON_HOMOLOGOUS_END_JOINING_AT_TELOMERE	0.0027201	-0.0670636	0.0697837	0.0455556	0.0755044	0
TCGA	GOBP_TOR_SIGNALING	-0.0400734	-0.0359846	-0.00408879	0.857471	0.888095	0
TCGA	GOBP_REGULATION_OF_GLUCOCORTICOID_METABOLIC_PROCESS	-0.179687	0.0904544	-0.270141	2.12413e-07	1.18592e-06	0
TCGA	GOBP_REGULATION_OF_PROTEIN_AUTOPHOSPHORYLATION	-0.0244266	-0.00305758	-0.021369	0.507136	0.587741	0
TCGA	GOBP_NEGATIVE_REGULATION_OF_PROTEIN_AUTOPHOSPHORYLATION	-0.00930749	0.0121627	-0.0214701	0.917228	0.936607	0
TCGA	GOBP_POSITIVE_REGULATION_OF_PROTEIN_AUTOPHOSPHORYLATION	0.0163219	-0.0229862	0.0393081	0.572966	0.64733	0
TCGA	GOBP_CORTICOSTEROID_RECEPTOR_SIGNALING_PATHWAY	-0.0448768	-0.0369881	-0.00788866	0.51886	0.599138	0
TCGA	GOBP_RESPONSE_TO_CORTICOSTEROID	0.0239649	0.0230038	0.000961127	0.842457	0.87648	0
TCGA	GOBP_L_AMINO_ACID_TRANSPORT	0.00214468	0.00687122	-0.00472654	0.533865	0.612702	1
TCGA	GOBP_POSITIVE_REGULATION_OF_FATTY_ACID_BETA_OXIDATION	0.0507627	-0.0230272	0.0737899	0.166775	0.23195	0
TCGA	GOBP_REGULATION_OF_TOR_SIGNALING	-0.053663	-0.0367315	-0.0169315	0.0478818	0.0788194	0
TCGA	GOBP_NEGATIVE_REGULATION_OF_TOR_SIGNALING	-0.116621	-0.0214148	-0.095206	4.46826e-05	0.000157585	0
TCGA	GOBP_POSITIVE_REGULATION_OF_TOR_SIGNALING	-0.0441635	-0.0524464	0.00828292	0.164437	0.2292	0
TCGA	GOBP_ARF_PROTEIN_SIGNAL_TRANSDUCTION	-0.0260484	0.0101172	-0.0361656	0.0119747	0.0231952	0
TCGA	GOBP_POSITIVE_REGULATION_OF_INSULIN_SECRETION	-0.0164724	0.0293474	-0.0458198	0.0113399	0.0221091	0
TCGA	GOBP_RESPONSE_TO_MAGNESIUM_ION	6.7452e-05	0.0695498	-0.0694824	0.0128123	0.0246671	0
TCGA	GOBP_MITOCHONDRIAL_DNA_METABOLIC_PROCESS	-0.0938821	-0.0498756	-0.0440065	0.30159	0.383218	0
TCGA	GOBP_CARDIOLIPIN_METABOLIC_PROCESS	-0.0800406	-0.0148145	-0.0652261	0.0136283	0.0260308	0
TCGA	GOBP_BLEB_ASSEMBLY	0.126875	-0.0945905	0.221465	0.0301535	0.0523535	0
TCGA	GOBP_REGULATION_OF_NUCLEASE_ACTIVITY	0.10181	-0.11029	0.212099	9.40698e-07	4.62601e-06	0
TCGA	GOBP_REGULATION_OF_DEOXYRIBONUCLEASE_ACTIVITY	0.0680348	-0.0801484	0.148183	0.000459541	0.00128071	0
TCGA	GOBP_NEGATIVE_REGULATION_OF_NF_KAPPAB_TRANSCRIPTION_FACTOR_ACTIVITY	0.124246	-0.0709741	0.19522	8.2017e-20	2.70283e-18	0
TCGA	GOBP_NEGATIVE_REGULATION_OF_PROTEIN_BINDING	0.0243291	-0.0252123	0.0495415	0.000839281	0.00218093	0
TCGA	GOBP_POSITIVE_REGULATION_OF_PROTEIN_BINDING	0.00631398	-0.0438536	0.0501676	0.11194	0.16438	0
TCGA	GOBP_RESPONSE_TO_FOOD	0.0162164	0.0514267	-0.0352104	0.212886	0.285819	0
TCGA	GOBP_REGULATION_OF_RESPONSE_TO_FOOD	0.0304492	0.0408699	-0.0104207	0.875555	0.903138	0
TCGA	GOBP_NEGATIVE_REGULATION_OF_RESPONSE_TO_FOOD	-0.0463998	0.0454848	-0.0918846	0.0910076	0.137746	0
TCGA	GOBP_REGULATION_OF_APPETITE	0.0229623	0.0856296	-0.0626673	0.105399	0.155992	0
TCGA	GOBP_NEGATIVE_REGULATION_OF_RESPONSE_TO_EXTERNAL_STIMULUS	0.136426	-0.0200208	0.156447	5.90652e-10	4.91403e-09	0
TCGA	GOBP_POSITIVE_REGULATION_OF_RESPONSE_TO_EXTERNAL_STIMULUS	0.179356	-0.0682235	0.24758	1.63462e-20	6.23737e-19	0
TCGA	GOBP_REGULATION_OF_RESPONSE_TO_EXTRACELLULAR_STIMULUS	-0.00701225	0.0332596	-0.0402718	0.158134	0.221693	0
TCGA	GOBP_ACTIVATION_OF_PROTEIN_KINASE_ACTIVITY	0.0147965	-0.0133386	0.0281351	0.372785	0.456977	0
TCGA	GOBP_ACTIVATION_OF_PROTEIN_KINASE_B_ACTIVITY	-0.0388061	0.00317194	-0.041978	0.158699	0.222302	0
TCGA	GOBP_TRANSPOSITION	0.24872	-0.0468152	0.295535	1.75415e-22	1.04733e-20	0
TCGA	GOBP_TELOMERE_ORGANIZATION	0.00111948	-0.113644	0.114763	0.00424139	0.00925412	0
TCGA	GOBP_TELOMERE_MAINTENANCE_VIA_SEMI_CONSERVATIVE_REPLICATION	0.139214	-0.171651	0.310866	0.000543644	0.00148573	0
TCGA	GOBP_REGULATION_OF_TELOMERE_MAINTENANCE	-0.0342285	-0.068599	0.0343705	0.422443	0.507672	0
TCGA	GOBP_NEGATIVE_REGULATION_OF_TELOMERE_MAINTENANCE	-0.0356174	-0.0407463	0.00512891	0.85221	0.883547	0
TCGA	GOBP_POSITIVE_REGULATION_OF_TELOMERE_MAINTENANCE	-0.0256742	-0.0962544	0.0705802	0.0220936	0.0398879	0
TCGA	GOBP_NEGATIVE_REGULATION_OF_TELOMERE_MAINTENANCE_VIA_TELOMERASE	-0.0499779	-0.0917398	0.0417619	0.32221	0.404556	0
TCGA	GOBP_REGULATION_OF_SYNAPTIC_TRANSMISSION_GABAERGIC	-0.0414779	0.054319	-0.0957969	6.99963e-06	2.95288e-05	0
TCGA	GOBP_POSITIVE_REGULATION_OF_SYNAPTIC_TRANSMISSION_GABAERGIC	-0.0859493	0.0744233	-0.160373	2.66207e-05	9.91197e-05	0
TCGA	GOBP_REGULATION_OF_ACTIN_FILAMENT_BUNDLE_ASSEMBLY	-0.0292258	-0.0188599	-0.0103659	0.372785	0.456977	0
TCGA	GOBP_NEGATIVE_REGULATION_OF_ACTIN_FILAMENT_BUNDLE_ASSEMBLY	-0.0946263	0.00865943	-0.103286	0.0044912	0.00974052	0
TCGA	GOBP_POSITIVE_REGULATION_OF_ACTIN_FILAMENT_BUNDLE_ASSEMBLY	0.0247409	-0.0221749	0.0469158	0.32221	0.404556	0
TCGA	GOBP_REGULATION_OF_NUCLEOBASE_CONTAINING_COMPOUND_TRANSPORT	-0.00511043	-0.0230401	0.0179297	0.778614	0.826148	0
TCGA	GOBP_SECRETORY_GRANULE_LOCALIZATION	-0.110721	0.0805256	-0.191247	1.0274e-05	4.18462e-05	0
TCGA	GOBP_METHYLATION	-0.0357551	-0.024953	-0.0108021	0.0943539	0.142175	0
TCGA	GOBP_REGULATION_OF_PROTEIN_POLYMERIZATION	-0.0108738	-0.0199777	0.00910396	0.36767	0.452235	0
TCGA	GOBP_NEGATIVE_REGULATION_OF_PROTEIN_POLYMERIZATION	-0.0262681	-0.00957408	-0.016694	0.735636	0.790629	0
TCGA	GOBP_POSITIVE_REGULATION_OF_PROTEIN_POLYMERIZATION	0.0113592	-0.0413592	0.0527184	0.0034685	0.00773062	0
TCGA	GOBP_GONADOTROPIN_SECRETION	-0.131158	0.0978435	-0.229002	5.35545e-08	3.28644e-07	0
TCGA	GOBP_MYELIN_ASSEMBLY	-0.0914119	-0.0283807	-0.0630312	0.00321091	0.00720715	0
TCGA	GOBP_AXON_ENSHEATHMENT_IN_CENTRAL_NERVOUS_SYSTEM	-0.0323264	0.0417687	-0.0740951	0.0168792	0.0314818	0
TCGA	GOBP_REGULATION_OF_ICOSANOID_SECRETION	0.0307475	0.0805775	-0.04983	0.0441254	0.0734217	0
TCGA	GOBP_REGULATION_OF_PROSTAGLANDIN_SECRETION	-0.0175939	0.0537722	-0.071366	0.0274916	0.0482935	0
TCGA	GOBP_ICOSANOID_SECRETION	0.0139658	0.0846921	-0.0707262	0.00279951	0.00638254	0
TCGA	GOBP_PROSTAGLANDIN_SECRETION	-0.0238065	0.074916	-0.0987226	0.00173259	0.00416133	0
TCGA	GOBP_ALANINE_TRANSPORT	0.00375256	-0.00681178	0.0105643	0.895219	0.919126	0
TCGA	GOBP_SERINE_TRANSPORT	0.0459281	-0.0669845	0.112913	0.000553389	0.00150587	0
TCGA	GOBP_REGULATION_OF_CHONDROCYTE_DIFFERENTIATION	-0.0199526	0.0275125	-0.0474652	0.0472377	0.0778601	0
TCGA	GOBP_NEGATIVE_REGULATION_OF_CHONDROCYTE_DIFFERENTIATION	-0.0291617	-0.0114636	-0.0176981	0.442092	0.526423	0
TCGA	GOBP_POSITIVE_REGULATION_OF_CHONDROCYTE_DIFFERENTIATION	-0.0460516	0.126305	-0.172357	6.53114e-05	0.000221709	0
TCGA	GOBP_ALDOSTERONE_METABOLIC_PROCESS	-0.18656	0.11575	-0.30231	1.09297e-09	8.76273e-09	0
TCGA	GOBP_REGULATION_OF_HORMONE_METABOLIC_PROCESS	-0.0831685	0.0184811	-0.10165	0.000360445	0.00103465	0
TCGA	GOBP_NEGATIVE_REGULATION_OF_HORMONE_METABOLIC_PROCESS	-0.0227074	0.0297629	-0.0524703	0.466933	0.549938	0
TCGA	GOBP_POSITIVE_REGULATION_OF_HORMONE_METABOLIC_PROCESS	-0.0898846	-0.00445832	-0.0854263	0.00259598	0.0059803	0
TCGA	GOBP_RESPONSE_TO_FOLLICLE_STIMULATING_HORMONE	-0.00797753	0.0661301	-0.0741076	0.0162303	0.0303943	0
TCGA	GOBP_RESPONSE_TO_ESTRADIOL	0.0177117	0.0203775	-0.00266579	0.666797	0.731832	0
TCGA	GOBP_INTRACELLULAR_LIPID_TRANSPORT	-0.083849	0.00156784	-0.0854168	0.00150458	0.00367634	0
TCGA	GOBP_INTRACELLULAR_STEROL_TRANSPORT	-0.0615793	-0.00492321	-0.0566561	0.0127779	0.0246101	0
TCGA	GOBP_REGULATION_OF_LIPID_TRANSPORT	-0.00696552	0.0291295	-0.036095	0.0559574	0.0902683	0
TCGA	GOBP_NEGATIVE_REGULATION_OF_LIPID_TRANSPORT	0.0154887	0.040641	-0.0251523	0.46459	0.547942	0
TCGA	GOBP_POSITIVE_REGULATION_OF_LIPID_TRANSPORT	0.0269349	0.0300004	-0.00306545	0.769081	0.817914	0
TCGA	GOBP_REGULATION_OF_STEROL_TRANSPORT	0.000178719	0.0143472	-0.0141685	0.816324	0.855076	0
TCGA	GOBP_NEGATIVE_REGULATION_OF_STEROL_TRANSPORT	-0.00127755	0.0277887	-0.0290662	0.166775	0.23195	0
TCGA	GOBP_POSITIVE_REGULATION_OF_STEROL_TRANSPORT	0.0125113	-0.000315813	0.0128271	0.227664	0.302143	0
TCGA	GOBP_REGULATION_OF_INTRACELLULAR_TRANSPORT	-0.0153364	-0.0191111	0.00377476	0.555493	0.631242	0
TCGA	GOBP_NEGATIVE_REGULATION_OF_INTRACELLULAR_TRANSPORT	0.00304028	-0.0169312	0.0199715	0.685004	0.747451	0
TCGA	GOBP_POSITIVE_REGULATION_OF_INTRACELLULAR_TRANSPORT	-0.00658347	-0.0270225	0.020439	0.259381	0.336493	0
TCGA	GOBP_DNA_GEOMETRIC_CHANGE	0.0360282	-0.111374	0.147402	0.0104149	0.0205186	0
TCGA	GOBP_REGULATION_OF_TRANSPORTER_ACTIVITY	-0.0225686	0.0186391	-0.0412077	0.0319465	0.0550521	0
TCGA	GOBP_NEGATIVE_REGULATION_OF_TRANSPORTER_ACTIVITY	-0.0153982	0.00919819	-0.0245964	0.223994	0.298052	0
TCGA	GOBP_POSITIVE_REGULATION_OF_TRANSPORTER_ACTIVITY	0.0162067	0.00921782	0.00698887	0.831981	0.867894	0
TCGA	GOBP_LYSOSOME_LOCALIZATION	0.123956	-0.063088	0.187044	6.35776e-08	3.85953e-07	0
TCGA	GOBP_REGULATION_OF_PHOSPHOLIPASE_A2_ACTIVITY	0.0304103	0.0674164	-0.0370061	0.370734	0.455122	0
TCGA	GOBP_REGULATION_OF_PROTEASOMAL_UBIQUITIN_DEPENDENT_PROTEIN_CATABOLIC_PROCESS	-0.0574682	-0.0373721	-0.020096	0.142135	0.202622	0
TCGA	GOBP_NEGATIVE_REGULATION_OF_PROTEASOMAL_UBIQUITIN_DEPENDENT_PROTEIN_CATABOLIC_PROCESS	-0.0829562	-0.0447149	-0.0382414	0.0810366	0.124587	0
TCGA	GOBP_POSITIVE_REGULATION_OF_PROTEASOMAL_UBIQUITIN_DEPENDENT_PROTEIN_CATABOLIC_PROCESS	-0.0511693	-0.0318446	-0.0193247	0.213238	0.28614	0
TCGA	GOBP_ENDOCYTIC_RECYCLING	-0.0258706	-0.02115	-0.00472067	0.624858	0.694972	0
TCGA	GOBP_REGULATION_OF_CYTOKINESIS	-0.0020048	-0.0538765	0.0518717	0.174244	0.240688	0
TCGA	GOBP_POSITIVE_REGULATION_OF_CYTOKINESIS	0.00263723	-0.0241878	0.0268251	0.18448	0.252491	0
TCGA	GOBP_ENDOPLASMIC_RETICULUM_CALCIUM_ION_HOMEOSTASIS	0.011705	-0.0560188	0.0677239	0.0475589	0.078364	0
TCGA	GOBP_LONG_CHAIN_FATTY_ACID_BIOSYNTHETIC_PROCESS	-0.0361741	0.0236576	-0.0598317	0.104782	0.155261	1
TCGA	GOBP_LONG_CHAIN_FATTY_ACID_IMPORT_INTO_CELL	-0.113294	0.014654	-0.127948	1.37317e-05	5.48295e-05	1
TCGA	GOBP_RAB_PROTEIN_SIGNAL_TRANSDUCTION	0.0490574	-0.0757111	0.124769	0.00115233	0.0028865	0
TCGA	GOBP_RAP_PROTEIN_SIGNAL_TRANSDUCTION	0.0818926	-0.100782	0.182674	0.0140346	0.0266762	0
TCGA	GOBP_CDC42_PROTEIN_SIGNAL_TRANSDUCTION	0.0365319	0.0073799	0.029152	0.0742723	0.115376	0
TCGA	GOBP_DETECTION_OF_MOLECULE_OF_BACTERIAL_ORIGIN	0.257577	-0.045011	0.302588	1.63113e-06	7.75091e-06	0
TCGA	GOBP_RESPONSE_TO_PEPTIDOGLYCAN	0.275947	-0.0928269	0.368774	4.23091e-09	3.11638e-08	0
TCGA	GOBP_RESPONSE_TO_MURAMYL_DIPEPTIDE	0.120785	-0.0494219	0.170207	3.15651e-06	1.42902e-05	0
TCGA	GOBP_CYTOKINETIC_PROCESS	-0.0159261	-0.0565359	0.0406098	0.408727	0.494585	0
TCGA	GOBP_MAINTENANCE_OF_PROTEIN_LOCATION_IN_CELL	-0.0178143	-0.0300116	0.0121973	0.250981	0.327605	0
TCGA	GOBP_ENDOSOME_TRANSPORT_VIA_MULTIVESICULAR_BODY_SORTING_PATHWAY	-0.0508813	-0.0589862	0.0081049	0.757395	0.808026	0
TCGA	GOBP_LATE_ENDOSOME_TO_VACUOLE_TRANSPORT_VIA_MULTIVESICULAR_BODY_SORTING_PATHWAY	0.0129098	-0.106532	0.119442	0.0298633	0.0519562	0
TCGA	GOBP_POSITIVE_REGULATION_OF_PHOSPHOPROTEIN_PHOSPHATASE_ACTIVITY	0.117454	-0.0399477	0.157402	2.777e-05	0.000103021	0
TCGA	GOBP_SOMITE_ROSTRAL_CAUDAL_AXIS_SPECIFICATION	-0.130349	0.0496605	-0.18001	4.40557e-09	3.23564e-08	0
TCGA	GOBP_RESPONSE_TO_RETINOIC_ACID	-0.0174824	0.0490748	-0.0665572	0.000650996	0.00173885	0
TCGA	GOBP_PROTEIN_EXIT_FROM_ENDOPLASMIC_RETICULUM	-0.0509852	-0.0375316	-0.0134536	0.966001	0.973289	0
TCGA	GOBP_MICROVILLUS_ORGANIZATION	-0.0761326	-0.0158943	-0.0602382	0.00106979	0.0027011	0
TCGA	GOBP_REGULATION_OF_MICROVILLUS_ORGANIZATION	-0.111892	0.0411655	-0.153058	0.00010877	0.000354988	0
TCGA	GOBP_REGULATION_OF_CELLULAR_COMPONENT_SIZE	0.0158783	-0.0192458	0.0351241	0.714087	0.772541	0
TCGA	GOBP_REGULATION_OF_CELL_PROJECTION_SIZE	0.0993255	0.00243404	0.0968914	0.0655564	0.103548	0
TCGA	GOBP_MITOCHONDRIAL_TRANSLATION	-0.0166282	-0.0528172	0.036189	0.18607	0.254323	0
TCGA	GOBP_RESPONSE_TO_PROGESTERONE	0.0581534	0.00764304	0.0505104	0.11767	0.171849	0
TCGA	GOBP_CHEMOKINE_PRODUCTION	0.142162	-0.0377428	0.179905	2.77198e-07	1.51429e-06	0
TCGA	GOBP_GRANULOCYTE_MACROPHAGE_COLONY_STIMULATING_FACTOR_PRODUCTION	0.277484	-0.0495741	0.327058	3.53685e-14	4.97217e-13	0
TCGA	GOBP_LONG_CHAIN_FATTY_ACID_METABOLIC_PROCESS	-0.00514326	0.0272144	-0.0323576	0.050759	0.0830438	1
TCGA	GOBP_LONG_CHAIN_FATTY_ACID_TRANSPORT	-0.0406908	0.0298635	-0.0705543	2.54088e-05	9.51659e-05	1
TCGA	GOBP_LONG_CHAIN_FATTY_ACYL_COA_BIOSYNTHETIC_PROCESS	-0.0721296	-0.0218513	-0.0502783	0.29713	0.378593	1
TCGA	GOBP_LONG_CHAIN_FATTY_ACYL_COA_METABOLIC_PROCESS	-0.050376	-0.0254199	-0.0249561	0.524461	0.604918	1
TCGA	GOBP_INTERLEUKIN_1_BETA_PRODUCTION	0.247867	-0.088763	0.33663	9.51602e-15	1.43732e-13	0
TCGA	GOBP_INTERLEUKIN_1_PRODUCTION	0.256806	-0.0861653	0.342971	1.49498e-15	2.53746e-14	0
TCGA	GOBP_INTERLEUKIN_10_PRODUCTION	0.263466	-0.0905387	0.354005	9.515e-17	1.90113e-15	0
TCGA	GOBP_INTERLEUKIN_12_PRODUCTION	0.340969	-0.139396	0.480365	5.30998e-22	2.92915e-20	0
TCGA	GOBP_INTERLEUKIN_13_PRODUCTION	0.183588	-0.0595285	0.243116	1.27507e-11	1.30991e-10	0
TCGA	GOBP_INTERLEUKIN_17_PRODUCTION	0.338149	-0.131249	0.469397	8.50183e-25	9.07196e-23	0
TCGA	GOBP_INTERLEUKIN_2_PRODUCTION	0.264721	-0.117897	0.382618	5.75523e-18	1.32763e-16	0
TCGA	GOBP_INTERLEUKIN_4_PRODUCTION	0.323929	-0.148741	0.47267	1.06743e-17	2.397e-16	0
TCGA	GOBP_INTERLEUKIN_5_PRODUCTION	0.122027	-0.00927035	0.131297	0.00022759	0.000689976	0
TCGA	GOBP_INTERLEUKIN_6_PRODUCTION	0.197053	-0.0654246	0.262478	7.53572e-12	8.00079e-11	0
TCGA	GOBP_INTERLEUKIN_8_PRODUCTION	0.148145	-0.0416916	0.189837	1.29202e-09	1.02935e-08	0
TCGA	GOBP_NEGATIVE_REGULATION_OF_CHEMOKINE_PRODUCTION	0.0419201	-0.0225174	0.0644375	0.00929496	0.0185206	0
TCGA	GOBP_NEGATIVE_REGULATION_OF_INTERFERON_BETA_PRODUCTION	0.201236	-0.117525	0.318761	1.39393e-12	1.59688e-11	0
TCGA	GOBP_MITOTIC_DNA_REPLICATION	0.17025	-0.135703	0.305953	0.000703135	0.00186437	1
TCGA	GOBP_NEGATIVE_REGULATION_OF_INTERLEUKIN_1_BETA_PRODUCTION	0.245288	-0.0759084	0.321196	1.06365e-12	1.24093e-11	0
TCGA	GOBP_NEGATIVE_REGULATION_OF_INTERLEUKIN_1_PRODUCTION	0.260512	-0.0782363	0.338748	3.84536e-13	4.71382e-12	0
TCGA	GOBP_NEGATIVE_REGULATION_OF_INTERLEUKIN_10_PRODUCTION	0.385246	-0.130452	0.515697	6.42483e-19	1.73436e-17	0
TCGA	GOBP_NEGATIVE_REGULATION_OF_INTERLEUKIN_12_PRODUCTION	0.416621	-0.168092	0.584713	4.18275e-18	9.91936e-17	0
TCGA	GOBP_NEGATIVE_REGULATION_OF_INTERLEUKIN_17_PRODUCTION	0.321346	-0.126054	0.4474	7.24741e-20	2.41978e-18	0
TCGA	GOBP_NEGATIVE_REGULATION_OF_INTERLEUKIN_2_PRODUCTION	0.314193	-0.10397	0.418162	7.71125e-17	1.55296e-15	0
TCGA	GOBP_NEGATIVE_REGULATION_OF_INTERLEUKIN_6_PRODUCTION	0.26619	-0.0901563	0.356347	2.57638e-11	2.56879e-10	0
TCGA	GOBP_NEGATIVE_REGULATION_OF_INTERLEUKIN_8_PRODUCTION	0.0442793	-0.0261937	0.070473	0.0434246	0.0723981	0
TCGA	GOBP_POSITIVE_REGULATION_OF_CHEMOKINE_PRODUCTION	0.167316	-0.0715185	0.238835	8.6553e-09	6.04204e-08	0
TCGA	GOBP_POSITIVE_REGULATION_OF_GRANULOCYTE_MACROPHAGE_COLONY_STIMULATING_FACTOR_PRODUCTION	0.262391	-0.088173	0.350564	8.77057e-14	1.18065e-12	0
TCGA	GOBP_MITOTIC_G2_DNA_DAMAGE_CHECKPOINT	0.0798095	-0.0558481	0.135658	0.000208678	0.000639519	1
TCGA	GOBP_MODIFIED_AMINO_ACID_TRANSPORT	-0.0532409	0.0412311	-0.094472	6.77279e-05	0.000228993	1
TCGA	GOBP_N_TERMINAL_PROTEIN_AMINO_ACID_ACETYLATION	-0.0134121	-0.036253	0.0228409	0.897493	0.921087	1
TCGA	GOBP_POSITIVE_REGULATION_OF_INTERLEUKIN_1_PRODUCTION	0.27009	-0.0884952	0.358586	1.37262e-15	2.34548e-14	0
TCGA	GOBP_POSITIVE_REGULATION_OF_INTERLEUKIN_10_PRODUCTION	0.250676	-0.0712846	0.321961	1.27599e-14	1.91587e-13	0
TCGA	GOBP_POSITIVE_REGULATION_OF_INTERLEUKIN_12_PRODUCTION	0.320395	-0.143968	0.464363	1.47982e-22	9.35979e-21	0
TCGA	GOBP_POSITIVE_REGULATION_OF_INTERLEUKIN_13_PRODUCTION	0.143566	-0.031183	0.174749	2.45193e-06	1.12713e-05	0
TCGA	GOBP_POSITIVE_REGULATION_OF_INTERLEUKIN_17_PRODUCTION	0.420858	-0.155981	0.57684	1.25254e-25	1.8573e-23	0
TCGA	GOBP_POSITIVE_REGULATION_OF_INTERLEUKIN_2_PRODUCTION	0.285705	-0.120184	0.40589	6.82364e-15	1.04622e-13	0
TCGA	GOBP_POSITIVE_REGULATION_OF_INTERLEUKIN_4_PRODUCTION	0.375952	-0.147664	0.523616	2.19225e-19	6.50624e-18	0
TCGA	GOBP_POSITIVE_REGULATION_OF_INTERLEUKIN_5_PRODUCTION	-0.0338075	0.079403	-0.113211	0.0462852	0.0765138	0
TCGA	GOBP_POSITIVE_REGULATION_OF_INTERLEUKIN_6_PRODUCTION	0.190169	-0.0661562	0.256325	1.00705e-10	9.27544e-10	0
TCGA	GOBP_POSITIVE_REGULATION_OF_INTERLEUKIN_8_PRODUCTION	0.181572	-0.0593835	0.240956	3.44603e-12	3.76909e-11	0
TCGA	GOBP_REGULATION_OF_MONOOXYGENASE_ACTIVITY	0.0859669	-0.0160427	0.10201	0.000435366	0.00122003	0
TCGA	GOBP_NEGATIVE_REGULATION_OF_MONOOXYGENASE_ACTIVITY	0.161703	-0.0394897	0.201193	6.54045e-07	3.32927e-06	0
TCGA	GOBP_POSITIVE_REGULATION_OF_MONOOXYGENASE_ACTIVITY	0.100405	-0.0290497	0.129454	1.27781e-07	7.43677e-07	0
TCGA	GOBP_NEGATIVE_REGULATION_OF_ATPASE_ACTIVITY	-0.0511128	-0.0358642	-0.0152486	0.839461	0.87408	0
TCGA	GOBP_POSITIVE_REGULATION_OF_ATPASE_ACTIVITY	0.0148801	-0.0397407	0.0546208	0.247832	0.324078	0
TCGA	GOBP_BILE_ACID_SECRETION	0.0361495	0.0892835	-0.0531339	0.153666	0.216266	0
TCGA	GOBP_REGULATION_OF_DNA_TEMPLATED_TRANSCRIPTION_ELONGATION	-0.0602595	-0.0198097	-0.0404498	0.291398	0.372412	0
TCGA	GOBP_NEGATIVE_REGULATION_OF_DNA_TEMPLATED_TRANSCRIPTION_ELONGATION	-0.0281212	-0.0754507	0.0473296	0.43699	0.521327	0
TCGA	GOBP_POSITIVE_REGULATION_OF_DNA_TEMPLATED_TRANSCRIPTION_ELONGATION	-0.0808007	-0.0103067	-0.070494	0.226927	0.301322	0
TCGA	GOBP_POSITIVE_REGULATION_OF_CREB_TRANSCRIPTION_FACTOR_ACTIVITY	-0.011393	0.0396649	-0.051058	0.12885	0.185507	0
TCGA	GOBP_LOW_DENSITY_LIPOPROTEIN_RECEPTOR_PARTICLE_METABOLIC_PROCESS	0.0266151	-0.0149379	0.0415531	0.194167	0.263899	0
TCGA	GOBP_RECEPTOR_CATABOLIC_PROCESS	0.00964758	-0.025267	0.0349146	0.363609	0.448218	0
TCGA	GOBP_REGULATION_OF_NATURAL_KILLER_CELL_ACTIVATION	0.323716	-0.105797	0.429513	1.73767e-22	1.04733e-20	0
TCGA	GOBP_POSITIVE_REGULATION_OF_NATURAL_KILLER_CELL_ACTIVATION	0.350274	-0.120007	0.470281	2.34062e-20	8.67056e-19	0
TCGA	GOBP_REGULATION_OF_NATURAL_KILLER_CELL_DIFFERENTIATION	0.320155	-0.106071	0.426226	3.81822e-13	4.69188e-12	0
TCGA	GOBP_GLOMERULUS_DEVELOPMENT	-0.113217	0.0291031	-0.14232	0.000772423	0.00202168	0
TCGA	GOBP_GLOMERULAR_BASEMENT_MEMBRANE_DEVELOPMENT	-0.0227699	0.0183291	-0.041099	0.33214	0.414767	0
TCGA	GOBP_RESPONSE_TO_INSULIN	-0.0423882	0.000455007	-0.0428432	0.00461411	0.00999856	0
TCGA	GOBP_CELLULAR_RESPONSE_TO_INSULIN_STIMULUS	-0.0516343	0.00201485	-0.0536491	0.00474007	0.0102409	0
TCGA	GOBP_REGULATION_OF_ESTABLISHMENT_OR_MAINTENANCE_OF_CELL_POLARITY	-0.0926569	-0.0169907	-0.0756662	0.0999517	0.149105	0
TCGA	GOBP_REGULATION_OF_POLYSACCHARIDE_METABOLIC_PROCESS	-0.0262142	0.00224476	-0.0284589	0.0103576	0.0204533	0
TCGA	GOBP_REGULATION_OF_POLYSACCHARIDE_BIOSYNTHETIC_PROCESS	-0.0695693	0.000170222	-0.0697396	2.49813e-05	9.37722e-05	0
TCGA	GOBP_REGULATION_OF_MICROTUBULE_BASED_PROCESS	-0.0441224	-0.0122427	-0.0318798	0.0200638	0.0366932	0
TCGA	GOBP_REGULATION_OF_ORGANIC_ACID_TRANSPORT	-0.0200269	0.0463143	-0.0663412	0.000753875	0.00198029	0
TCGA	GOBP_NEGATIVE_REGULATION_OF_ORGANIC_ACID_TRANSPORT	0.0183904	0.0627484	-0.044358	0.290086	0.370921	0
TCGA	GOBP_POSITIVE_REGULATION_OF_ORGANIC_ACID_TRANSPORT	0.0169187	0.0707769	-0.0538582	0.00166596	0.00402606	0
TCGA	GOBP_NEGATIVE_REGULATION_OF_VIRAL_TRANSCRIPTION	0.0306967	-0.0164477	0.0471443	0.0440247	0.0733023	0
TCGA	GOBP_TRANSFORMING_GROWTH_FACTOR_BETA1_PRODUCTION	0.178128	-0.0657244	0.243852	8.96277e-05	0.0002971	0
TCGA	GOBP_CIRCADIAN_REGULATION_OF_GENE_EXPRESSION	-0.0863546	0.0118108	-0.0981654	6.1633e-07	3.15947e-06	0
TCGA	GOBP_ACTIVIN_RECEPTOR_SIGNALING_PATHWAY	-0.0598357	0.0836378	-0.143473	2.34874e-09	1.78977e-08	0
TCGA	GOBP_REGULATION_OF_ACTIVIN_RECEPTOR_SIGNALING_PATHWAY	-0.130781	0.0597533	-0.190534	9.14649e-12	9.55112e-11	0
TCGA	GOBP_NEGATIVE_REGULATION_OF_ACTIVIN_RECEPTOR_SIGNALING_PATHWAY	-0.115596	0.0604511	-0.176047	1.00839e-08	6.90632e-08	0
TCGA	GOBP_REGULATION_OF_SUPEROXIDE_ANION_GENERATION	0.170408	-0.0850919	0.2555	6.54045e-07	3.32927e-06	0
TCGA	GOBP_SECRETION_BY_TISSUE	0.0430822	0.0614417	-0.0183596	0.176992	0.243821	0
TCGA	GOBP_INOSITOL_TRISPHOSPHATE_METABOLIC_PROCESS	0.0922822	-0.0262912	0.118573	0.00583097	0.0122789	0
TCGA	GOBP_INOSITOL_PHOSPHATE_BIOSYNTHETIC_PROCESS	0.134245	-0.0256536	0.159899	0.000352623	0.00101449	0
TCGA	GOBP_COLLAGEN_METABOLIC_PROCESS	0.0319287	-0.0228935	0.0548222	0.0694344	0.108793	0
TCGA	GOBP_COLLAGEN_BIOSYNTHETIC_PROCESS	0.0212327	-0.035603	0.0568357	0.299355	0.380758	0
TCGA	GOBP_POSITIVE_REGULATION_OF_TRANSCRIPTION_ELONGATION_FROM_RNA_POLYMERASE_II_PROMOTER	-0.0557269	-0.031203	-0.0245239	0.258169	0.335178	0
TCGA	GOBP_REGULATION_OF_ACTIN_FILAMENT_BASED_PROCESS	-0.0208554	-0.0113448	-0.00951061	0.568411	0.643042	0
TCGA	GOBP_PROTEIN_CONTAINING_COMPLEX_DISASSEMBLY	-0.0167598	-0.0323288	0.015569	0.525085	0.605226	0
TCGA	GOBP_PROTEIN_DNA_COMPLEX_DISASSEMBLY	-0.161662	-0.00503758	-0.156624	0.00769458	0.0157269	0
TCGA	GOBP_MUSCLE_CELL_PROLIFERATION	-0.00160632	-0.0276931	0.0260868	0.933968	0.949307	0
TCGA	GOBP_REGULATION_OF_MAST_CELL_ACTIVATION	0.167283	-0.0493895	0.216673	8.84173e-08	5.27283e-07	0
TCGA	GOBP_NEGATIVE_REGULATION_OF_MAST_CELL_ACTIVATION	0.239432	-0.0914123	0.330844	1.12067e-06	5.43726e-06	0
TCGA	GOBP_POSITIVE_REGULATION_OF_MAST_CELL_ACTIVATION	0.0787422	0.000541694	0.0782005	0.0107647	0.0211338	0
TCGA	GOBP_REGULATION_OF_MAST_CELL_ACTIVATION_INVOLVED_IN_IMMUNE_RESPONSE	0.137023	-0.0427504	0.179773	1.59212e-05	6.31251e-05	0
TCGA	GOBP_POSITIVE_REGULATION_OF_MAST_CELL_ACTIVATION_INVOLVED_IN_IMMUNE_RESPONSE	0.0458822	-0.0198007	0.0656829	0.399018	0.484222	0
TCGA	GOBP_TETRAPYRROLE_METABOLIC_PROCESS	-0.0579855	-0.0251149	-0.0328706	0.097604	0.146334	0
TCGA	GOBP_TETRAPYRROLE_BIOSYNTHETIC_PROCESS	-0.124729	-0.0193178	-0.105411	0.0194077	0.0357252	0
TCGA	GOBP_MYELOID_CELL_APOPTOTIC_PROCESS	0.0922851	-0.0342687	0.126554	5.2147e-06	2.25039e-05	0
TCGA	GOBP_REGULATION_OF_MYELOID_CELL_APOPTOTIC_PROCESS	0.00465366	-0.0128404	0.017494	0.156727	0.219904	0
TCGA	GOBP_NEGATIVE_REGULATION_OF_MYELOID_CELL_APOPTOTIC_PROCESS	0.0828753	0.00690523	0.07597	0.021004	0.0382199	0
TCGA	GOBP_REGULATION_OF_CHROMOSOME_ORGANIZATION	-0.013261	-0.0854201	0.0721591	0.0847746	0.129627	0
TCGA	GOBP_REGULATION_OF_MITOTIC_SISTER_CHROMATID_SEGREGATION	0.106338	-0.126178	0.232516	0.000346225	0.000998917	0
TCGA	GOBP_CELLULAR_PIGMENTATION	-0.00774941	-0.0326231	0.0248737	0.483516	0.565662	0
TCGA	GOBP_N_TERMINAL_PROTEIN_AMINO_ACID_MODIFICATION	-0.0515989	-0.0202761	-0.0313228	0.342753	0.426133	1
TCGA	GOBP_IMMATURE_T_CELL_PROLIFERATION	0.123997	-0.00621272	0.13021	0.000567306	0.00154126	0
TCGA	GOBP_REGULATION_OF_T_CELL_DIFFERENTIATION_IN_THYMUS	0.102939	-0.0439643	0.146903	2.75789e-07	1.50822e-06	0
TCGA	GOBP_MITOCHONDRIAL_RESPIRATORY_CHAIN_COMPLEX_ASSEMBLY	-0.0744893	-0.0891581	0.0146689	0.409271	0.494889	0
TCGA	GOBP_NEGATIVE_REGULATION_OF_RNA_SPLICING	-0.0404648	-0.0922047	0.0517399	0.533865	0.612702	0
TCGA	GOBP_POSITIVE_REGULATION_OF_RNA_SPLICING	-0.0149283	-0.0376253	0.022697	0.299801	0.38123	0
TCGA	GOBP_REGULATION_OF_HISTONE_PHOSPHORYLATION	0.085838	-0.0644381	0.150276	6.70408e-07	3.39892e-06	0
[truncated: 24,381 more rows]
