# Supplementary material
Source: publisher figshare collection journal article supplement (https://future-science-group.figshare.com/articles/dataset/_/21939662)
Supplement: Supplementary file 4 [file 1]

CIBERSORT CD8T median fraction difference

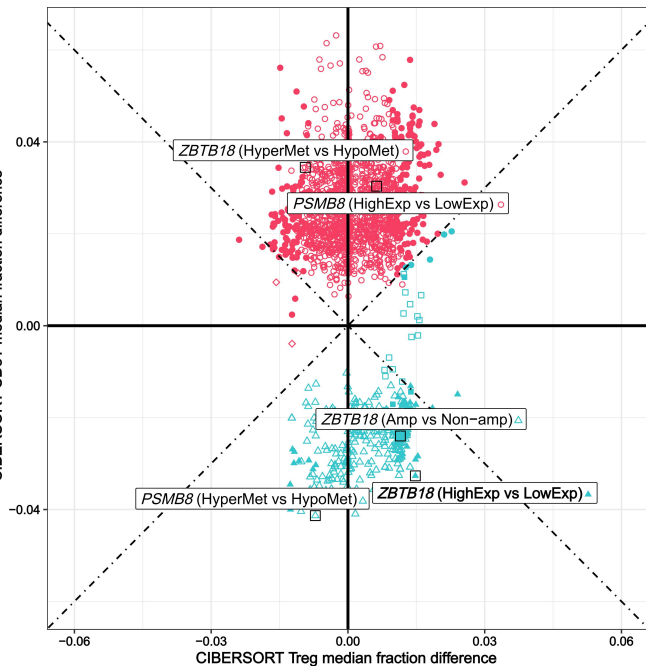

A

CIBERSORT M1 median fraction difference

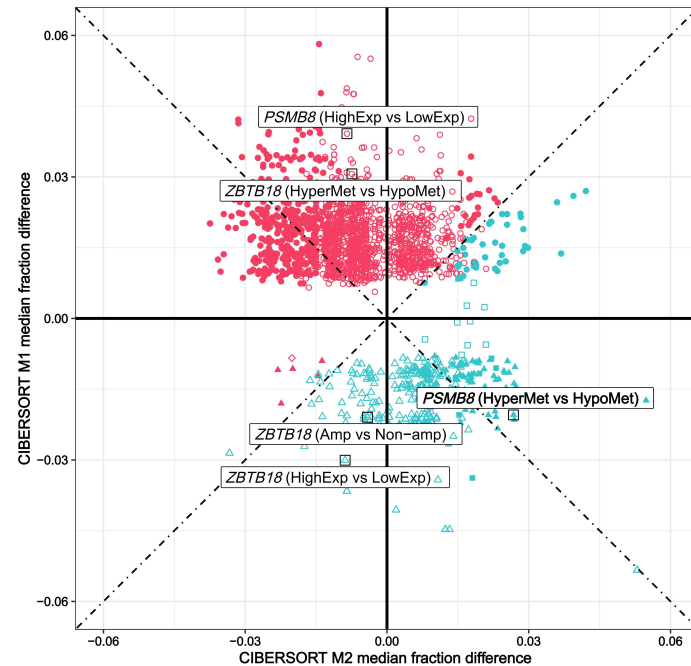

C

quanTiseq CD8T median fraction difference

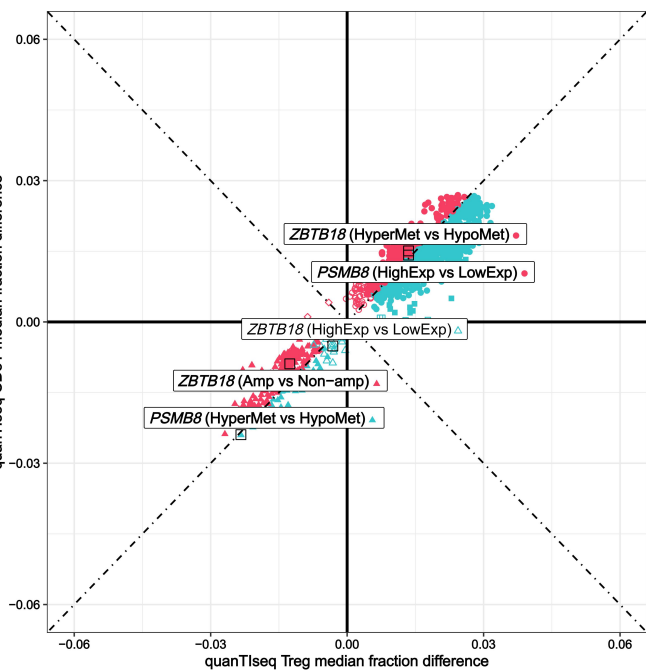

B

quanTiseq M1 median fraction difference

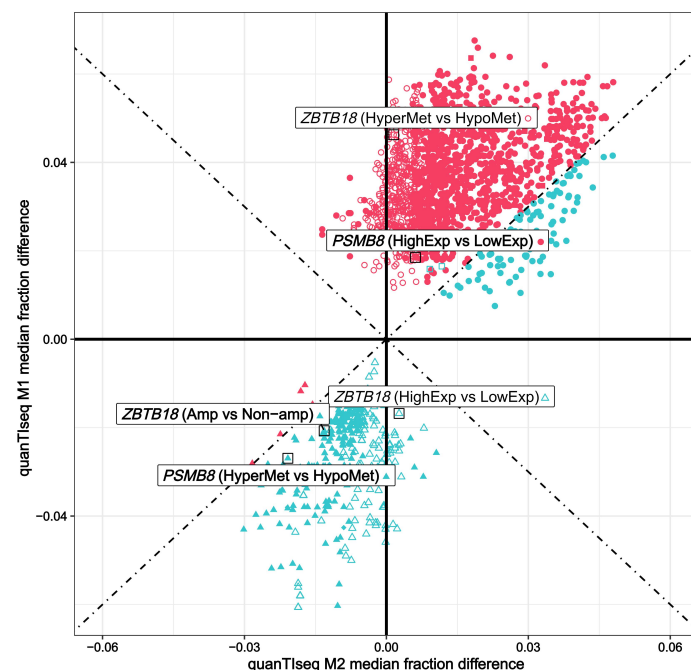

D
