# Supplementary material
Source: publisher figshare collection journal article supplement (https://future-science-group.figshare.com/articles/dataset/_/21939662)

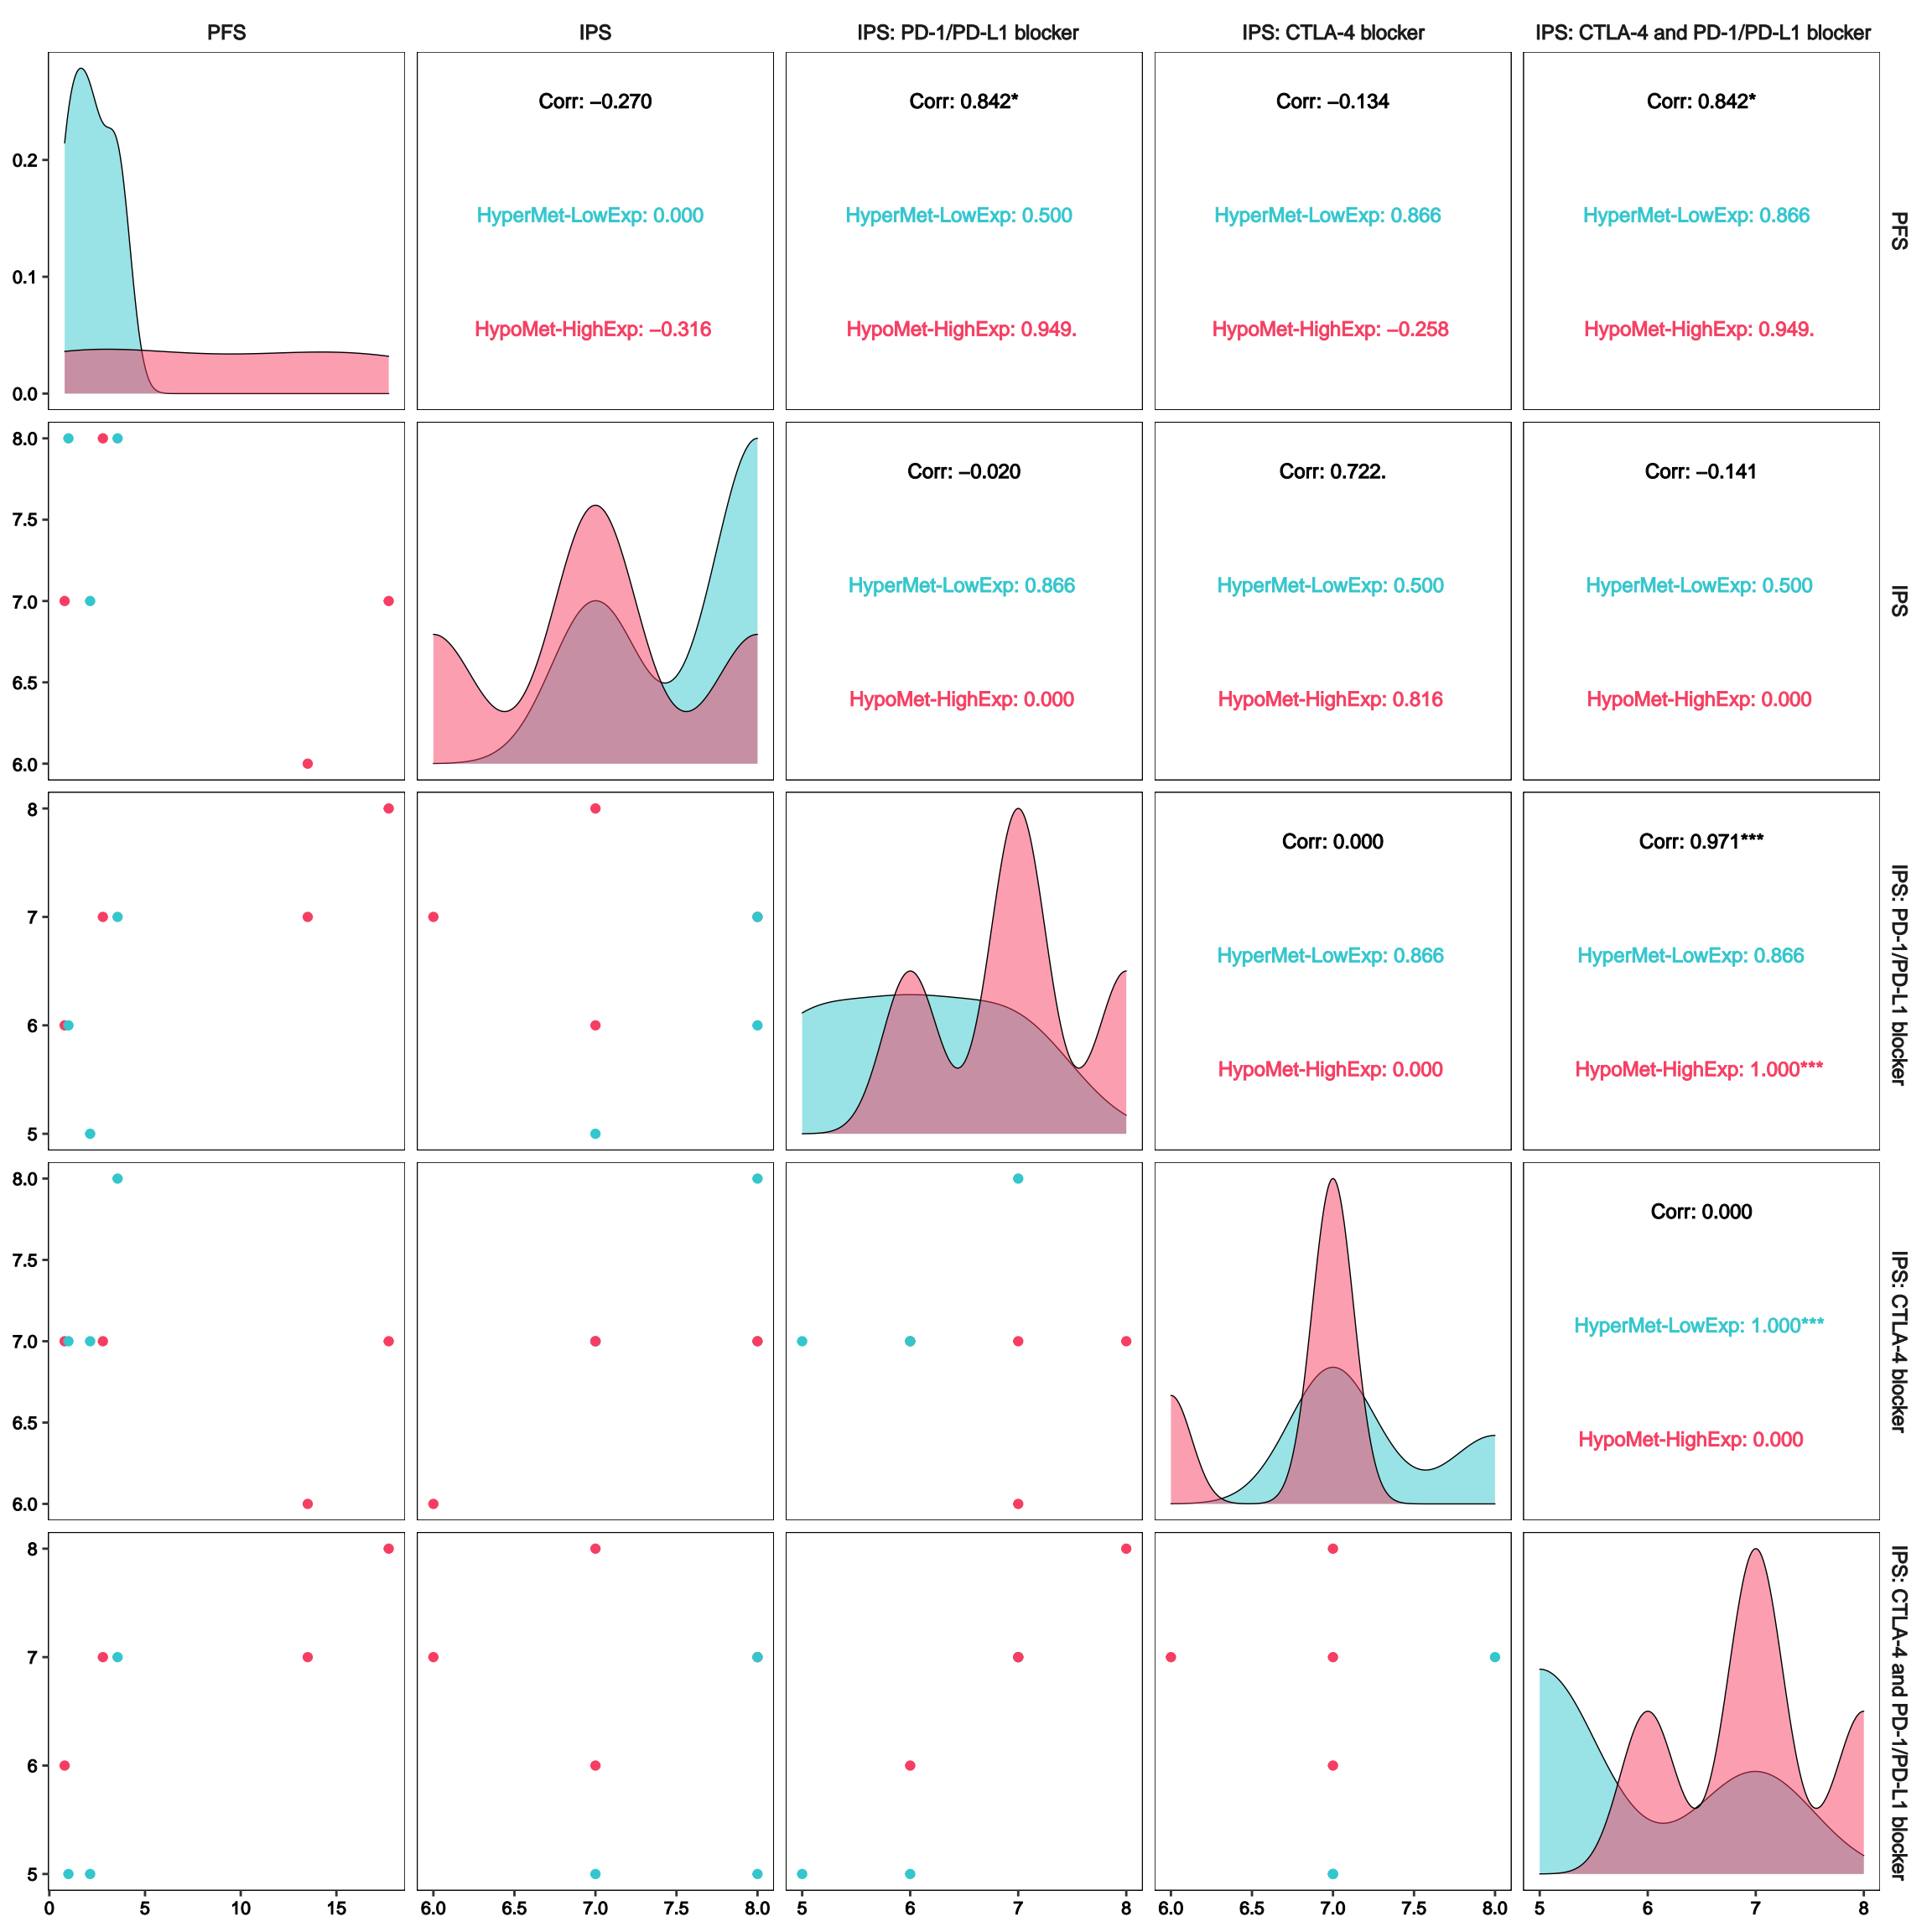

Supplement: Supplementary file 1 [file 1]

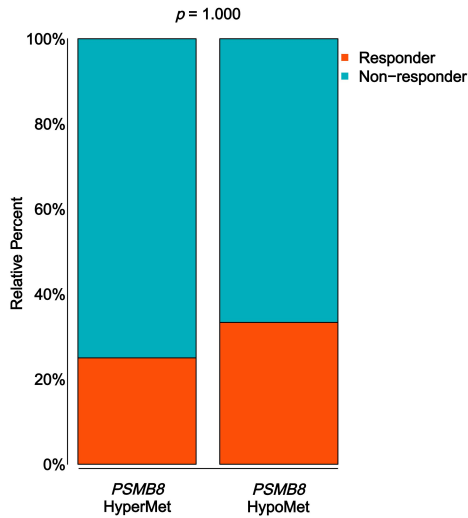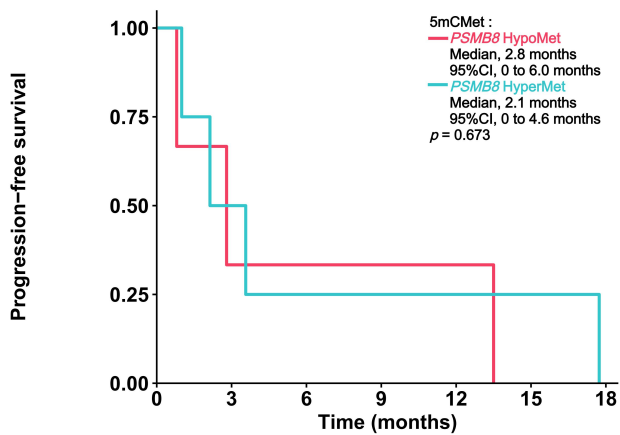

No.at risk:

|                       |   |   |   |   |   |   |   |
|-----------------------|---|---|---|---|---|---|---|
| <i>PSMB8</i> HypoMet  | 3 | 1 | 1 | 1 | 1 | 0 | 0 |
| <i>PSMB8</i> HyperMet | 4 | 2 | 1 | 1 | 1 | 1 | 0 |

**A**

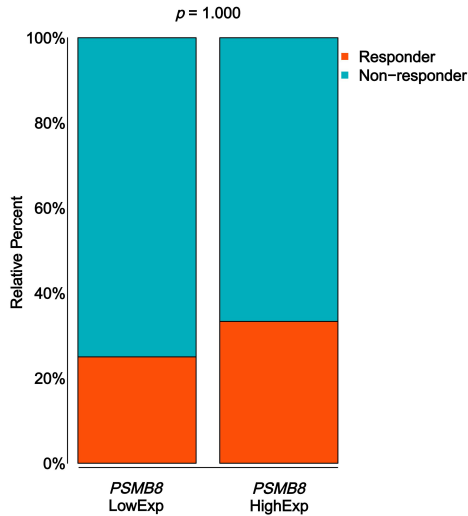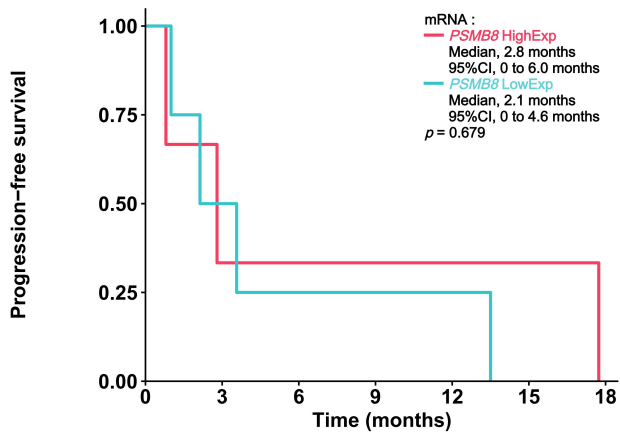

No.at risk:

|                      |   |   |   |   |   |   |   |
|----------------------|---|---|---|---|---|---|---|
| <i>PSMB8</i> HighExp | 3 | 1 | 1 | 1 | 1 | 1 | 0 |
| <i>PSMB8</i> LowExp  | 4 | 2 | 1 | 1 | 1 | 0 | 0 |

**C**

**B**

**D**

Supplement: Supplementary file 3 [file 1]

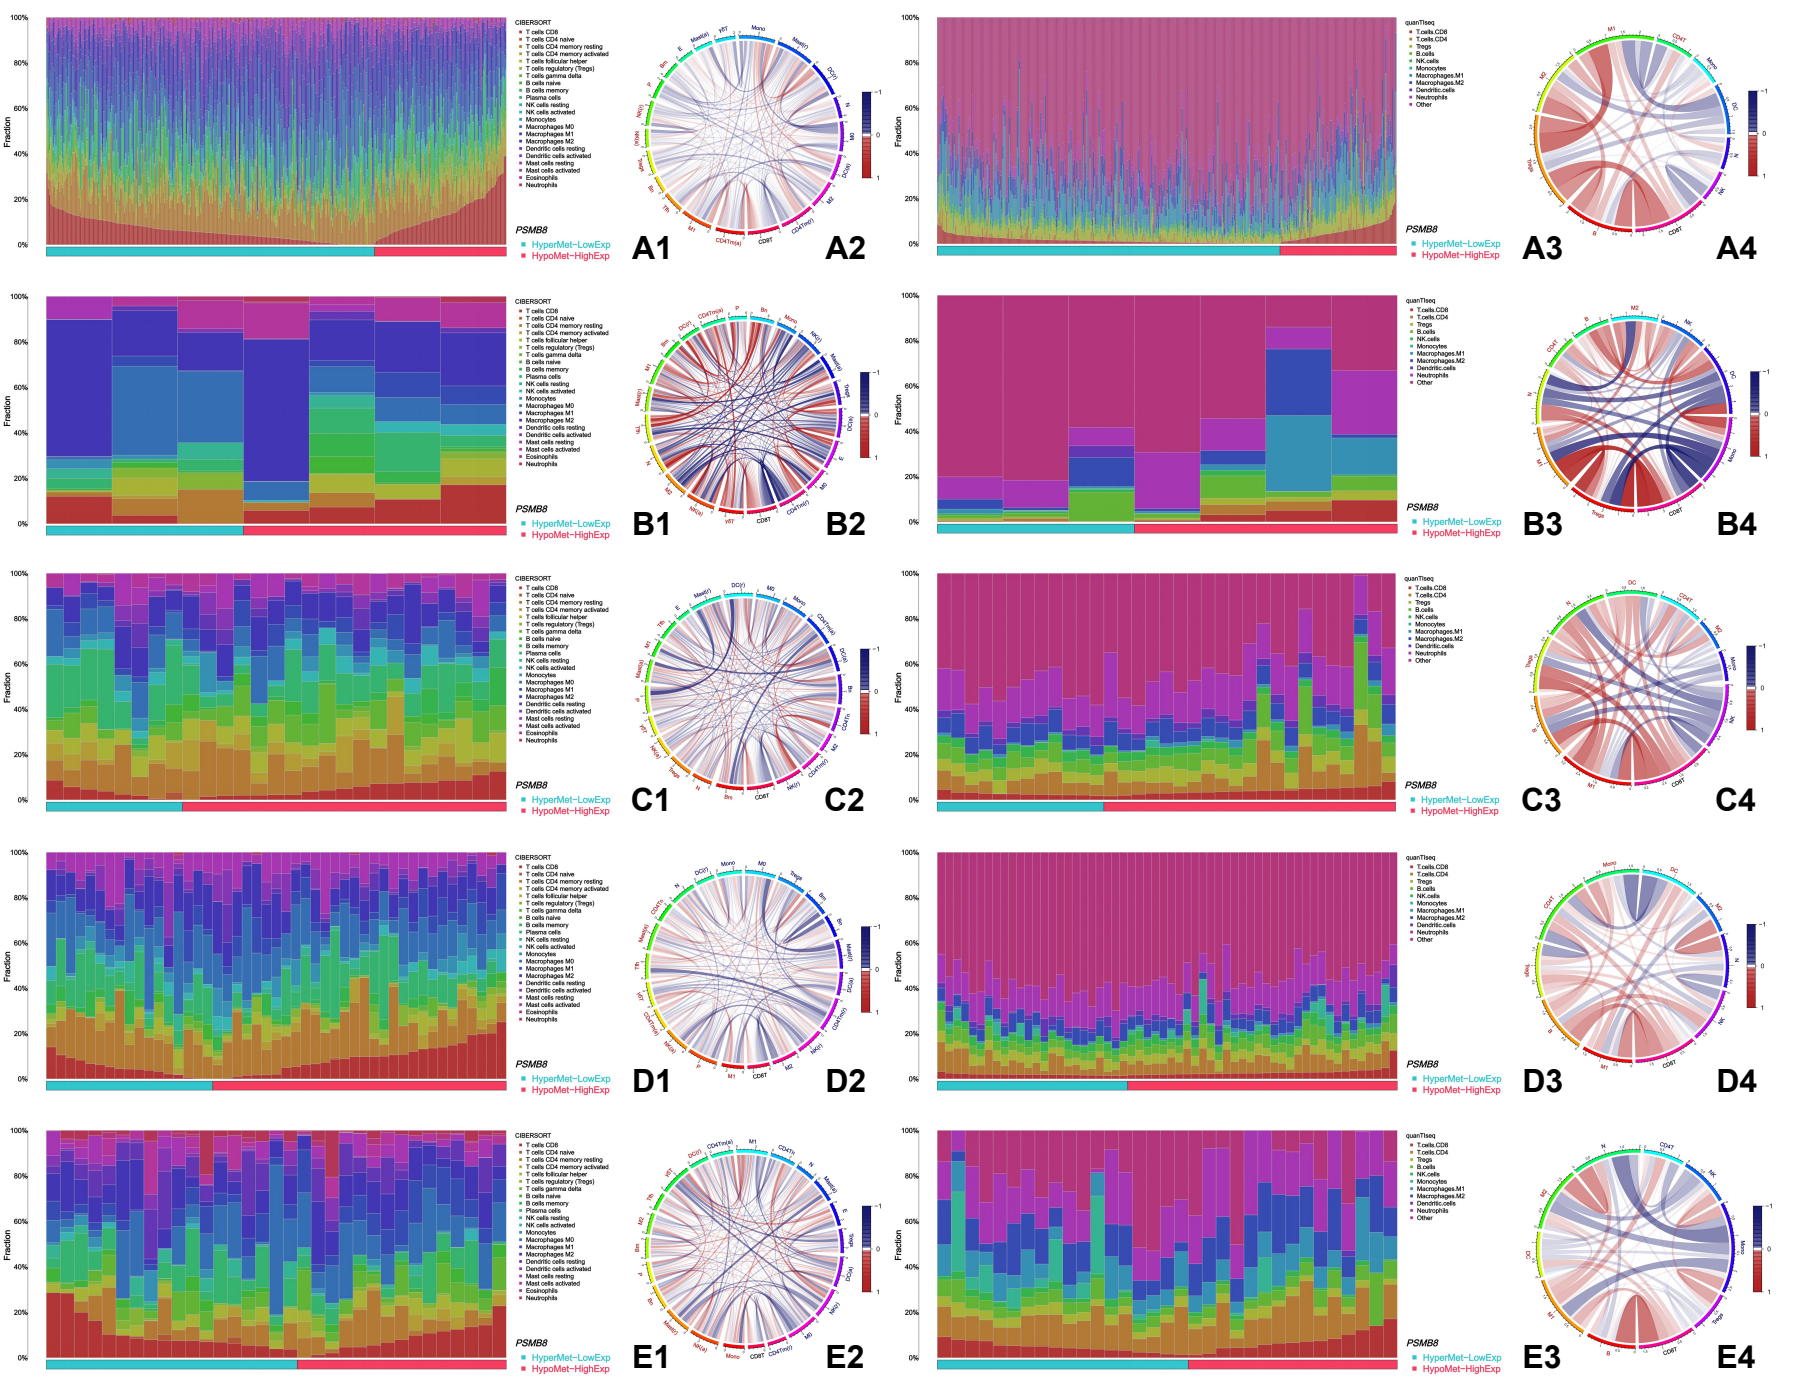

Supplement: Supplementary file 5 [file 1]

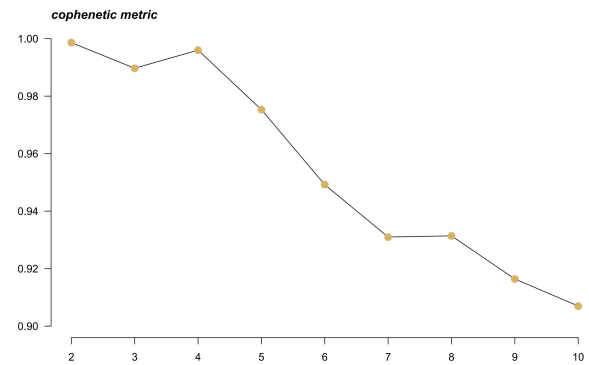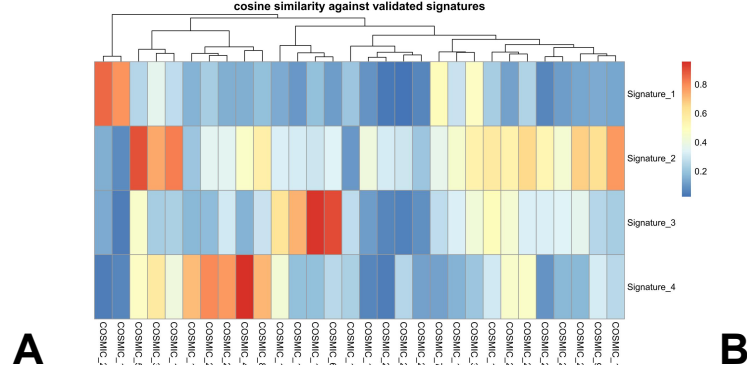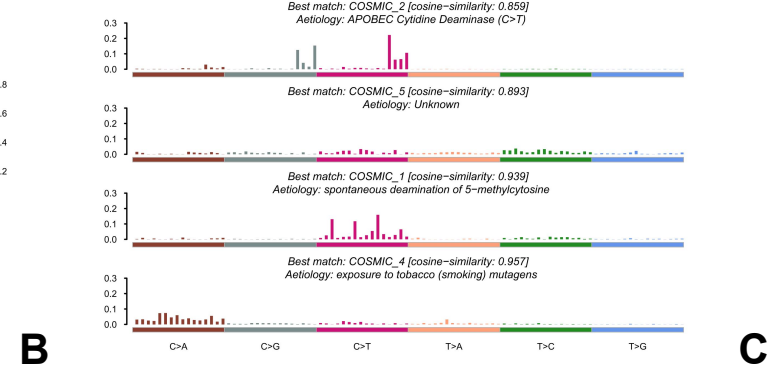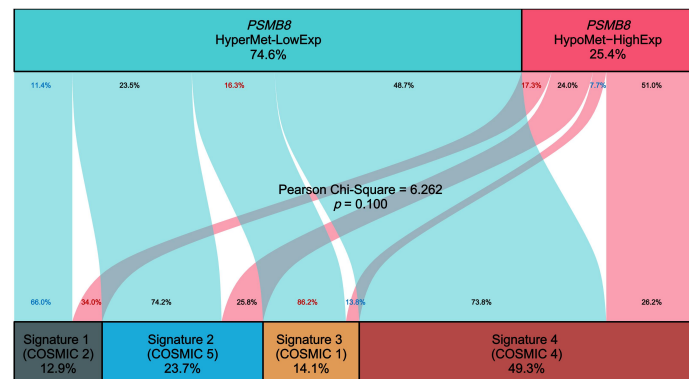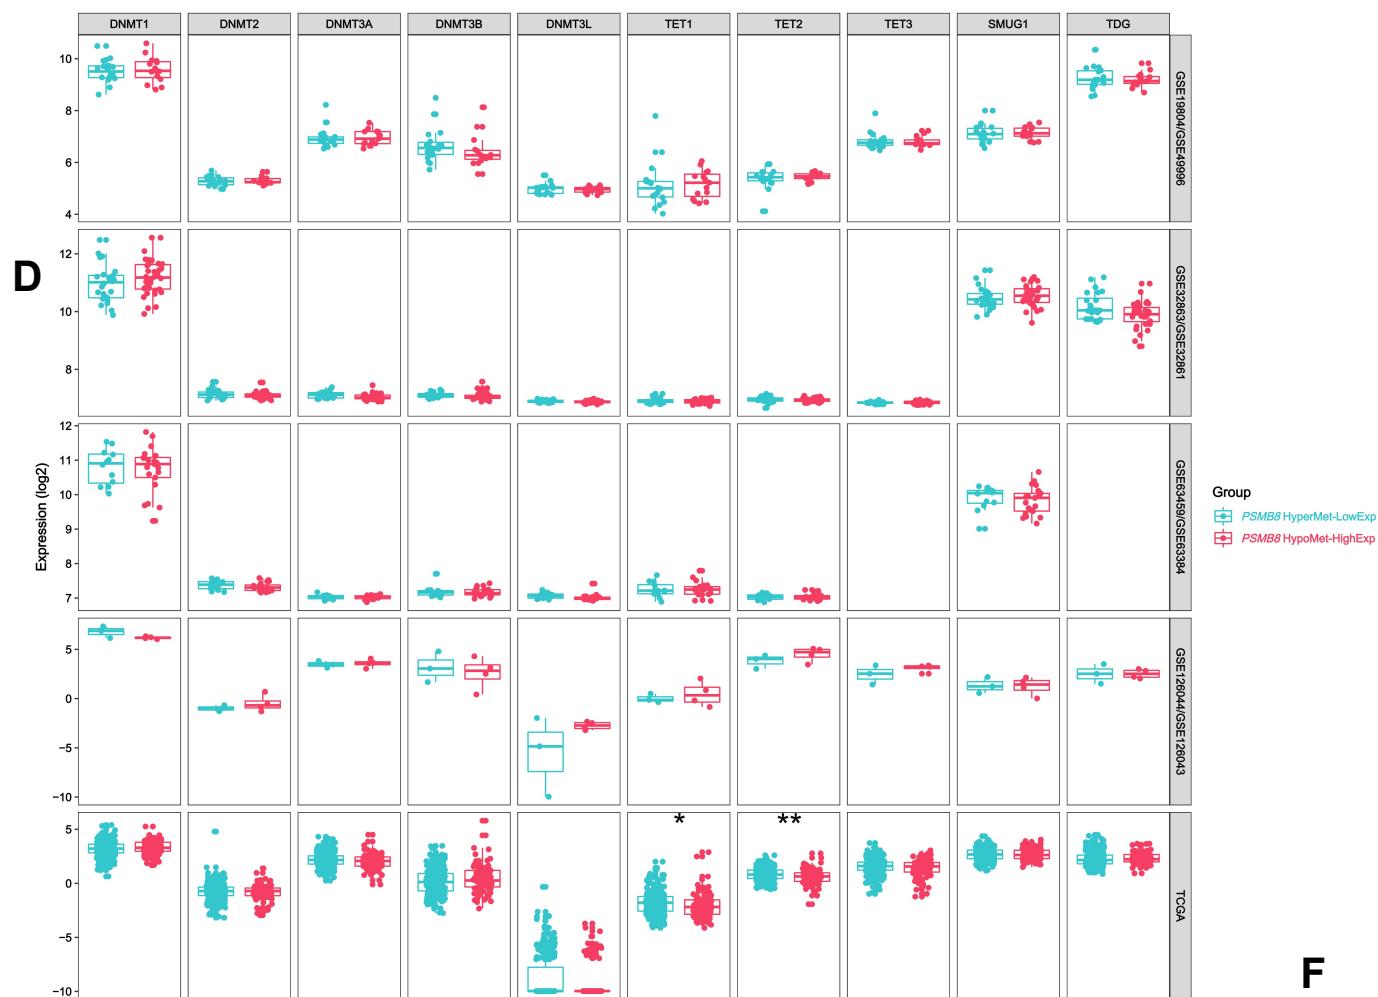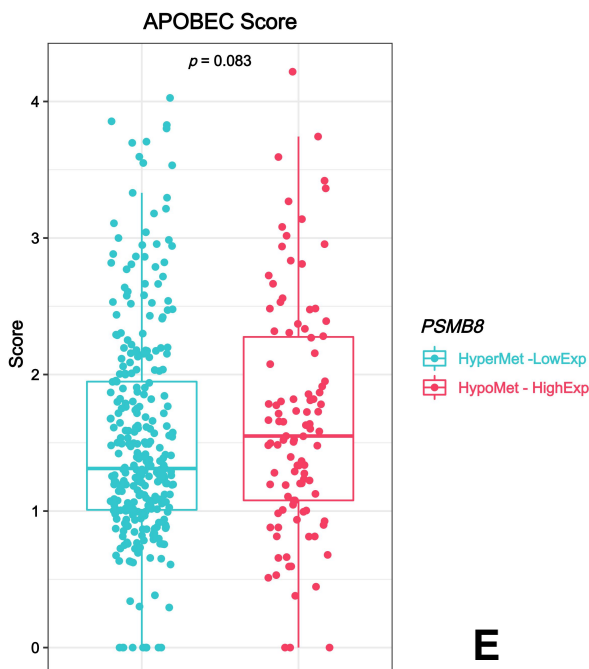

Supplement: Supplementary file 6 [file 1]

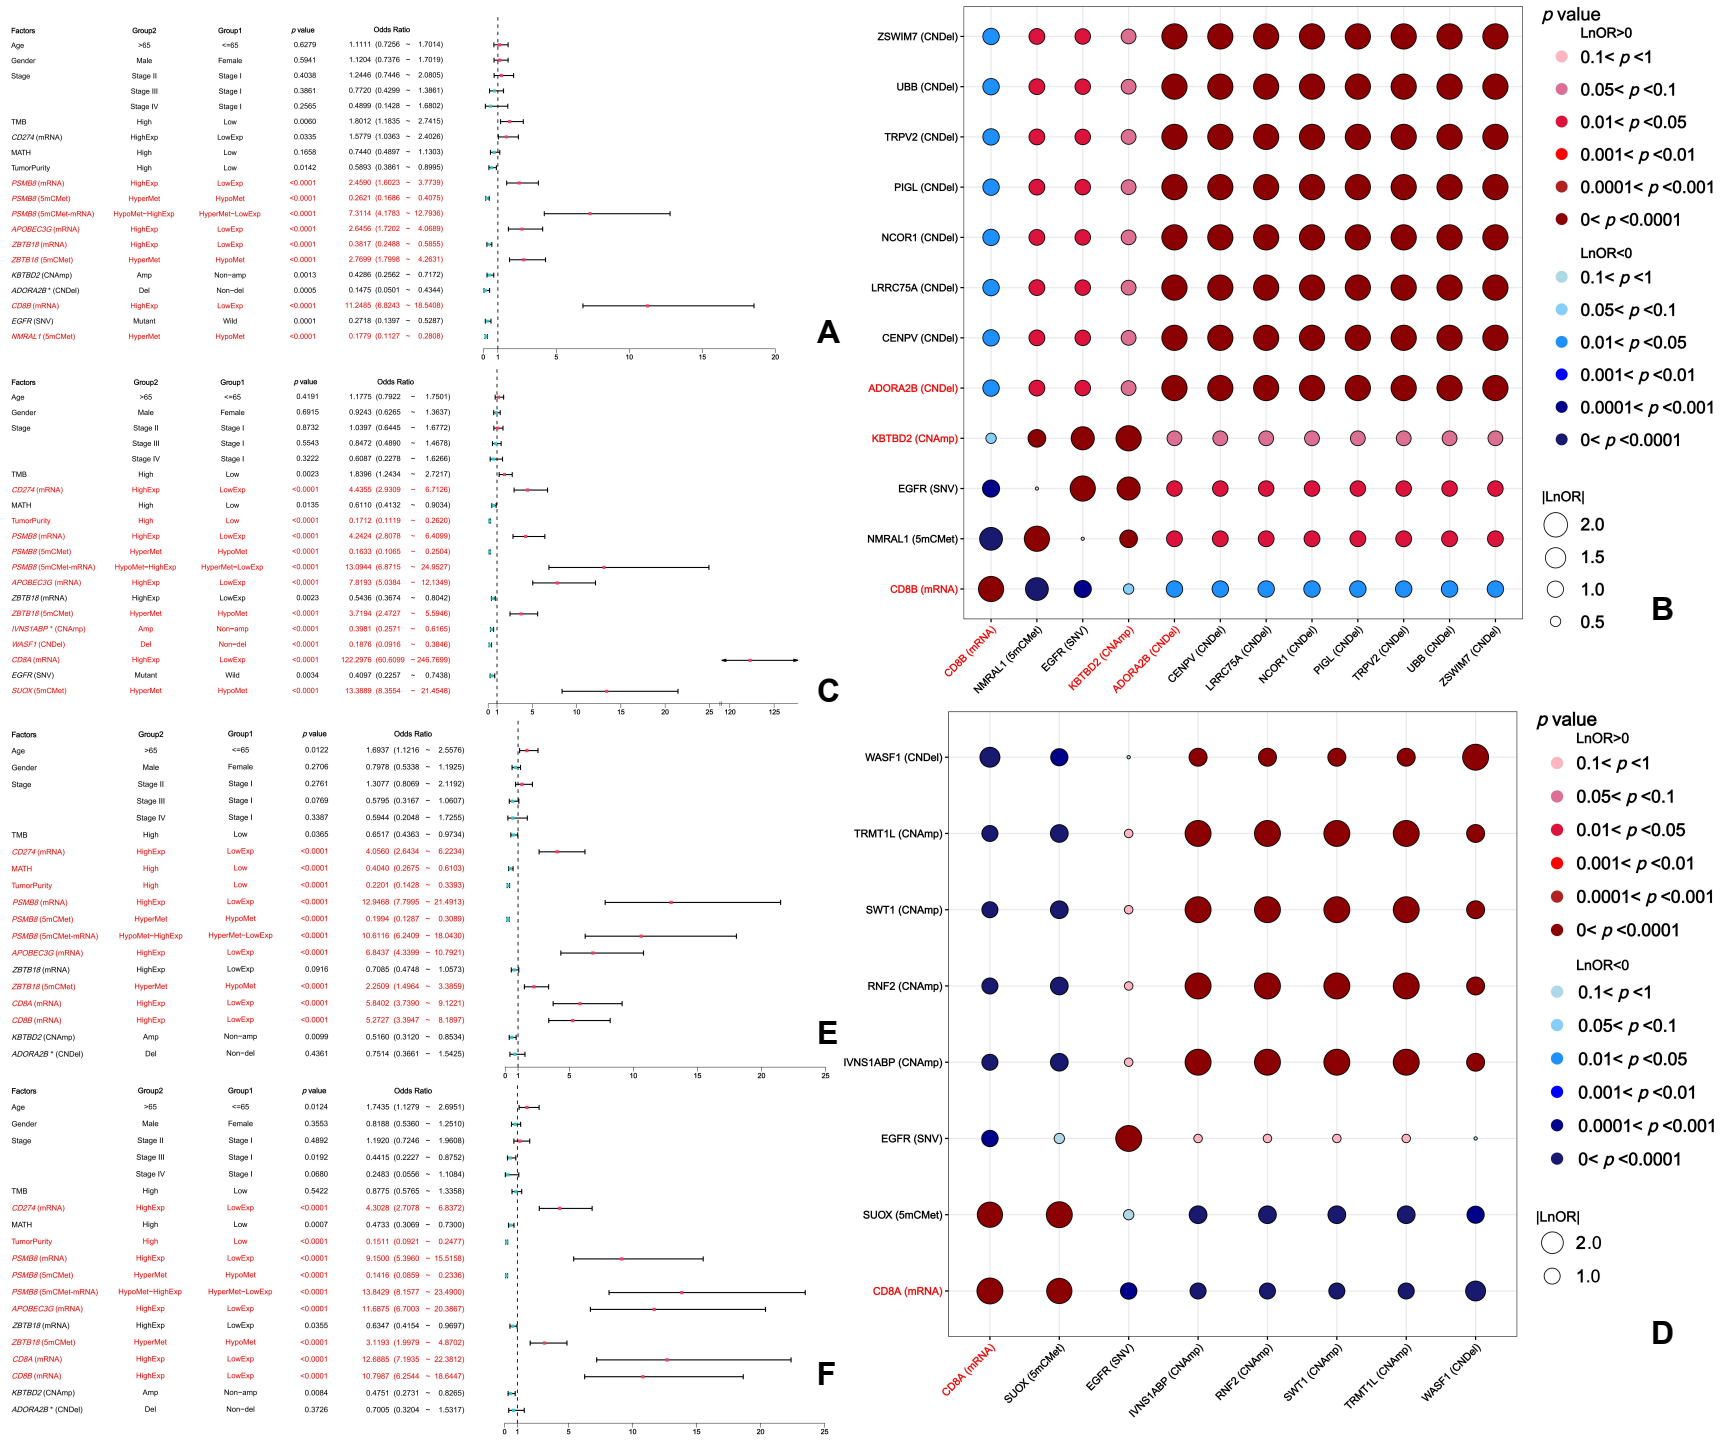

Supplement: Supplementary file 7 [file 1]

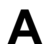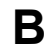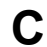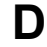

Supplement: Supplementary file 8 [file 1]
